# Supplementary material for: Regioselective intramolecular sp2 C–H amination: direct vs. mediated electrooxidation
Source: Royal Society of Chemistry journal article supplement (doi:10.1039/d0qo01584a), 2021-01-01

# Regioselective Intramolecular $sp^2$ C-H Amination: Direct vs. Mediated Electrooxidation

Jianxue Shi,<sup>a†</sup> Jingjing Li,<sup>a,b†</sup> Wenjing Zhao,<sup>a</sup> Mengru Cui,<sup>a</sup> Wanying Ni,<sup>a</sup>

Lijun Li,<sup>a</sup> Wenmin Liu<sup>a</sup>, Kun Xu<sup>a\*</sup> and Sheng Zhang<sup>a\*</sup>

## Supporting Information

Table of Contents

|                                                         |         |
|---------------------------------------------------------|---------|
| <b>Part I Experimental Section</b>                      | S2      |
| 1. General information                                  | S2      |
| 2. General procedures for C-H amination                 | S2-S3   |
| 3. Procedure for gram scale reaction                    | S3-S4   |
| 4. Cyclic voltammetric experiments                      | S4-S6   |
| 5. Procedure for control experiments                    | S6-S7   |
| 6. Crystal structure of <b>2z</b>                       | S8-S16  |
| 7. Photoluminescence spectra of <b>2m</b> and <b>2n</b> | S17-S19 |
| 8. Experimental data for C-H amination products         | S20-S32 |
| 8. References                                           | S32     |
| <b>Part II NMR Spectra</b>                              | S33-S73 |

## 1. General Information

$^1\text{H}$  NMR and  $^{13}\text{C}$  NMR were recorded on a Bruker 400 MHz spectrometer ( $^1\text{H}$  NMR: 400MHz,  $^{13}\text{C}$  NMR: 100MHz). The chemical shifts ( $\delta$ ) and coupling constants ( $J$ ) were expressed in ppm and Hz respectively.  $^1\text{H}$  NMR spectra were referenced to the solvent residual peak (TMS,  $\delta$  0 ppm) and  $^{13}\text{C}\{^1\text{H}\}$  NMR spectra were referenced to the solvent residual peak ( $\text{CDCl}_3$ ,  $\delta$  77.0 ppm). High Resolution mass spectra were obtained using Thermo Scientific LTQ Orbitrap XL mass spectrometer. All solvents were purified and dried according to the standard procedures unless otherwise noted. Commercially substrates were purchased and used directly. Substrates **1a-1al**<sup>[1]</sup> were prepared according to the literature procedures.

## 2. General procedures for C-H amination

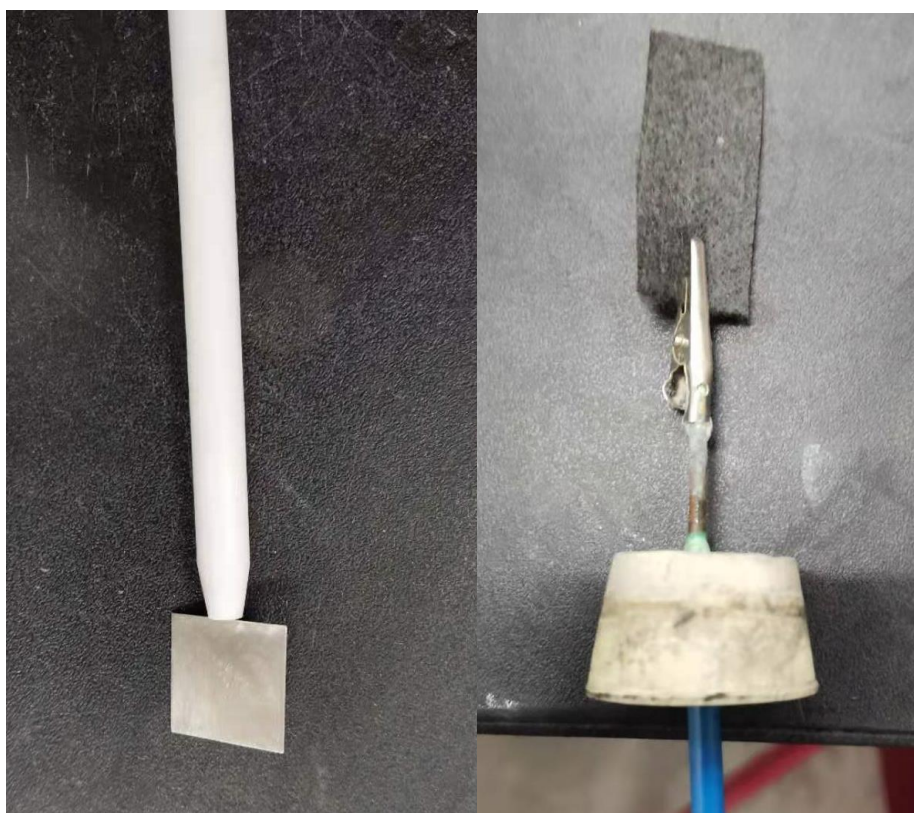

**Figure S1.** Electrodes (carbon cloth: width 1.5 cm, immergence depth 1.5 cm; platinum plate: width 1.5 cm)

### Procedure for direct oxidative C-H amination (Condition A, **1a** as an example)

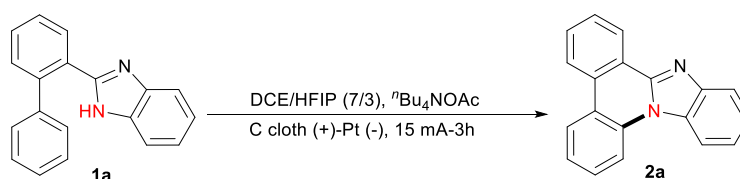

An undivided cell was equipped with a magnet stirrer, carbon cloth (1.5\*1.5 cm<sup>2</sup>), platinum plate (1.5 \*1.5 cm<sup>2</sup>), as the working electrode and counter electrode. The substrate 2-([1,1'-

biphenyl]-2-yl)-1H-benzo[d]imidazole **1a** (135 mg, 0.5 mmol), and  ${}^n\text{Bu}_4\text{NOAc}$  (301 mg, 1 mmol) were added to the solvent DCE/HFIP (7/3 mL). The resulting mixture was allowed to stir and electrolyze at constant current conditions (15 mA,  $J = 6.7 \text{ mA} \cdot \text{cm}^{-2}$ ) at room temperature for 3 hours. Then the volatile solvent was removed with a rotary evaporator. The residue was purified by column chromatography (PE/ EA= 10/1-6/1) on silica gel to afford the desired product **2a** (123 mg) in 92% yield.

### Procedure for indirect oxidative C-H amination (Condition B, **1a** as an example)

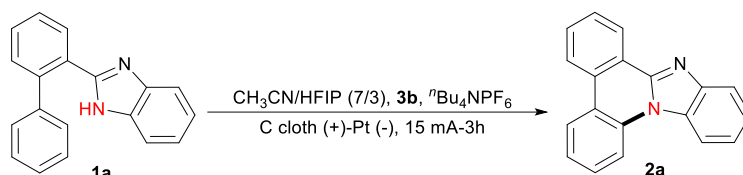

An undivided cell was equipped with a magnet stirrer, carbon cloth (1.5\*1.5 cm<sup>2</sup>), platinum plate (1.5 \*1.5 cm<sup>2</sup>), as the working electrode and counter electrode. The substrate 2-([1,1'-biphenyl]-2-yl)-1H-benzo[d]imidazole **1a** (135 mg, 0.5 mmol), tris(4-bromophenyl)amine **3b** (24 mg, 0.05 mmol), and  ${}^n\text{Bu}_4\text{NPF}_6$  (387 mg, 1 mmol) were added to the solvent CH<sub>3</sub>CN/HFIP (7/3 mL). The resulting mixture was allowed to stir and electrolyze at constant current conditions (15 mA,  $J = 6.7 \text{ mA} \cdot \text{cm}^{-2}$ ) at room temperature for 3 hours. Then the volatile solvent was removed with a rotary evaporator. The residue was purified by column chromatography (PE/ EA= 10/1-6/1) on silica gel to afford the desired product **2a** (118 mg) in 88% yield.

### 3. Procedure for gram scale reaction

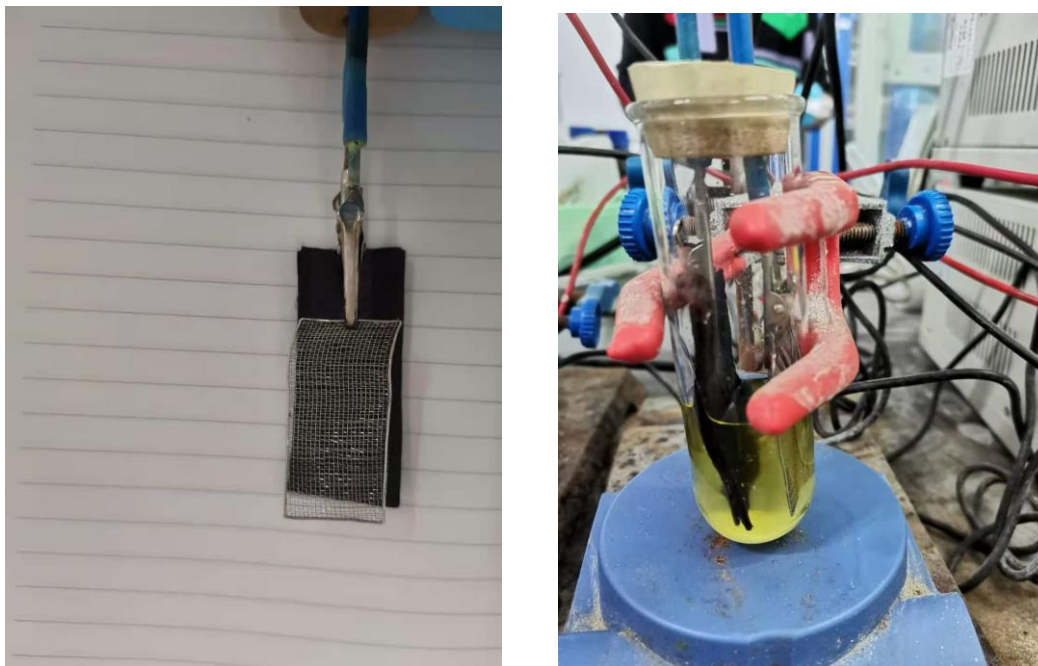

**Figure S2.** Gram-scale electrolysis setup (carbon cloth: width 2.5 cm, immersion depth 3 cm; platinum gauze electrode: width 2.5 cm, immersion depth 3 cm)

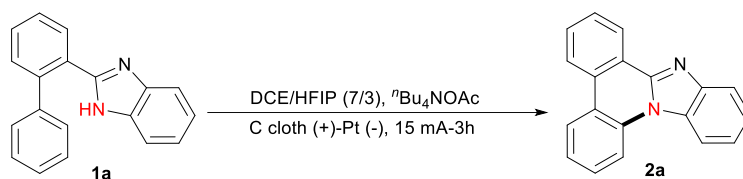

An undivided cell was equipped with a magnet stirrer, carbon cloth (2.5\*3 cm<sup>2</sup>), platinum gauze plate (2.5 \*3 cm<sup>2</sup>), as the working electrode and counter electrode (the electrolysis setup is shown in Fig. S2). The substrate 2-([1,1'-biphenyl]-2-yl)-1H-benzo[d]imidazole **1a** (1.08 g, 4 mmol), and <sup>t</sup>Bu<sub>4</sub>NOAc (602 mg, 2 mmol) were added to the solvent DCE/HFIP (14/6 mL). The resulting mixture was allowed to stir and electrolyze at constant current conditions (90 mA,  $J = 12 \text{ mA} \cdot \text{cm}^{-2}$ ) at room temperature for 4 hours. Then the volatile solvent was removed with a rotary evaporator. The residue was purified by column chromatography (PE/ EA= 10/1-6/1) on silica gel to afford the desired product **2a** (954 mg) in 89% yield.

#### 4. Cyclic voltammetric experiments

The electrochemical analysis was demonstrated with Ag wire as a reference electrode, which is not a stable reference electrode. CVs can be calibrated using ferrocene as an external reference. (Figure S3)  $E_0(\text{Fc}/\text{Fc}^*) = (1.06-0.058)/2 = 0.53 \text{ V}$ .

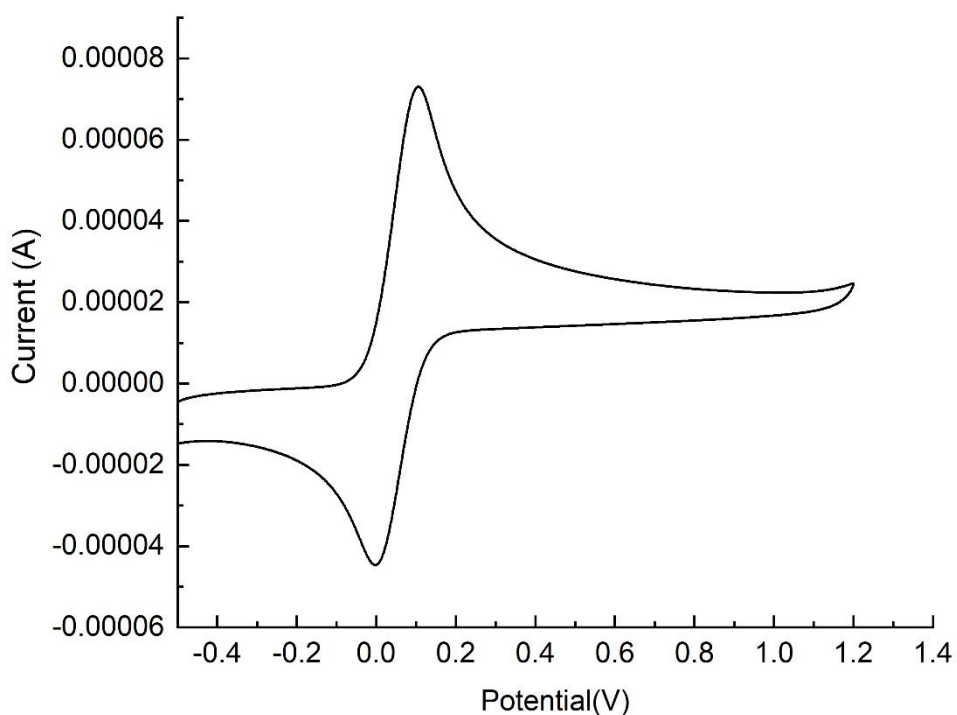

**Figure S3.** Cyclic voltammograms of ferrocene ( $5 \cdot 10^{-3} \text{ M}$ ) in 0.1 M LiClO<sub>4</sub>/CH<sub>3</sub>CN, using Pt wire working electrode, glassy carbon, and Ag/AgNO<sub>3</sub> (0.1 M in CH<sub>3</sub>CN) as counter and reference electrodes at 100 mV/s scan rate.

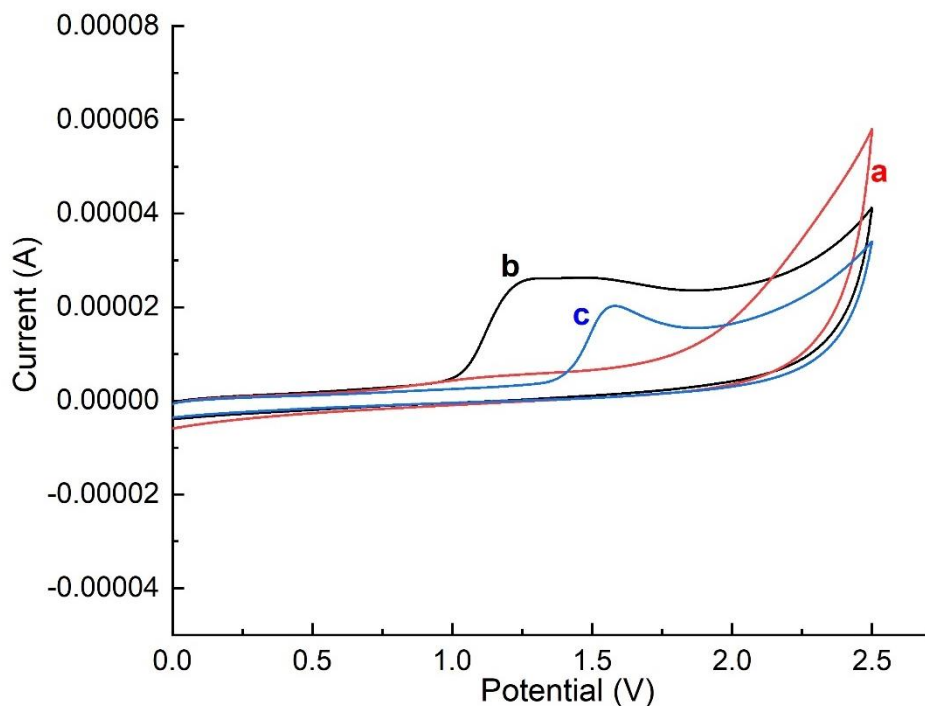

**Figure S4.** Cyclic voltammograms of substrates and catalyst in 0.1 M LiClO<sub>4</sub> (CH<sub>3</sub>CN), using Pt wire working electrode, glassy carbon, and Ag/AgNO<sub>3</sub> (0.1 M in CH<sub>3</sub>CN) as counter and reference electrodes at a 100 mV·s<sup>-1</sup> scan rate: (a) background; (b) 2-phenylbenzimidazole (5·10<sup>-3</sup> M); (c) biphenyl (5·10<sup>-3</sup> M).

As shown above, 2-phenylbenzimidazole (with anodic peak at 1.27 V) is more easily oxidized than biphenyl (with anodic peak at 1.57 V), and the anodic peak of 2-phenylbenzimidazole is close to that of substrate **1a** (with anodic peak at 1.14 V). In other word, benzimidazole moiety in the substrate **1a** is more likely to proceed anodic oxidation to afford nitrogen-centered radical.

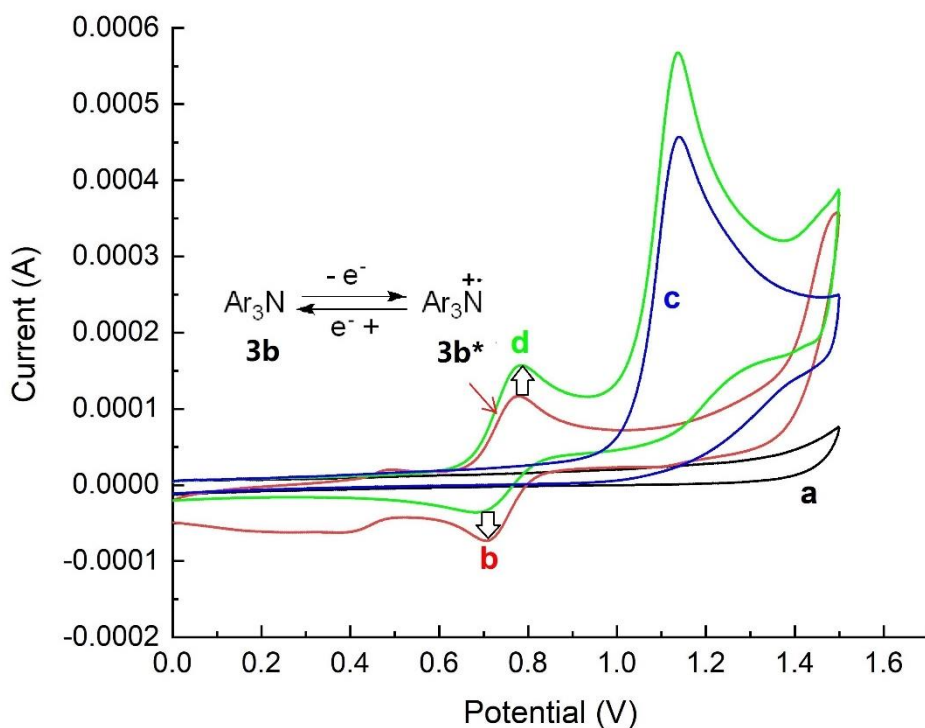

**Figure S5.** Cyclic voltammograms of substrates and catalyst in 0.1 M LiClO<sub>4</sub> (CH<sub>3</sub>CN), using Pt wire working electrode, glassy carbon, and Ag/AgNO<sub>3</sub> (0.1 M in CH<sub>3</sub>CN) as counter and reference electrodes at a 100 mV·s<sup>-1</sup> scan rate: (a) background; (b) **3b** (1\*10<sup>-3</sup> M); (c) **1a** (5\*10<sup>-3</sup> M); (d) **3b** (1\*10<sup>-3</sup> M) + **1a** (5\*10<sup>-3</sup> M).

As shown above, A couple of reversible redox peaks are shown on the spectrum of **3b** (curve b, Figure S5), and the anodic peak is assigned to the oxidation of **3b** to the corresponding cation radical species (**3b\***). Treating **3b** with 5 equivalents substrate **1a** led to an obvious increase of anodic peak of **3b** and decrease of its cathodic peak (curve d, Figure S5). The increase of anodic peak of **3b** associates with the regeneration of **3b**, which suggests that **3b** serves as a catalyst during the reaction. The decrease of the cathodic peak is attributed to the single electron transfer between substrate **1a** and the cation radical **3b\***.

## 5. Procedure for control experiments

### Procedure for KIE study

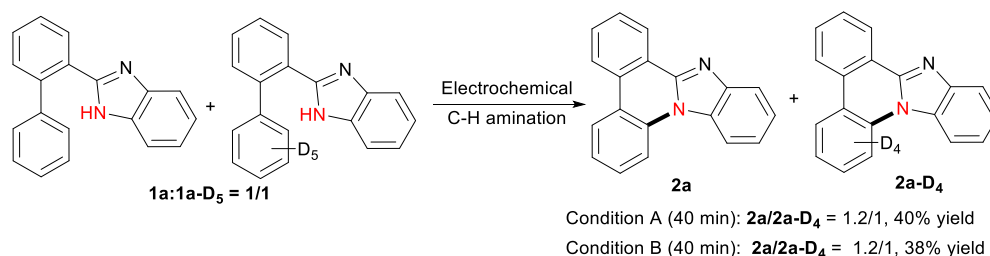

The mixture **1a** and **1a-D<sub>5</sub>** (1/1, 136 mg) were used to replace substrate **1a** under Condition A and Condition B with a shorter reaction time (40 min). The desired products were determined by <sup>1</sup>H NMR (**Figure S5** and **Figure S6**).

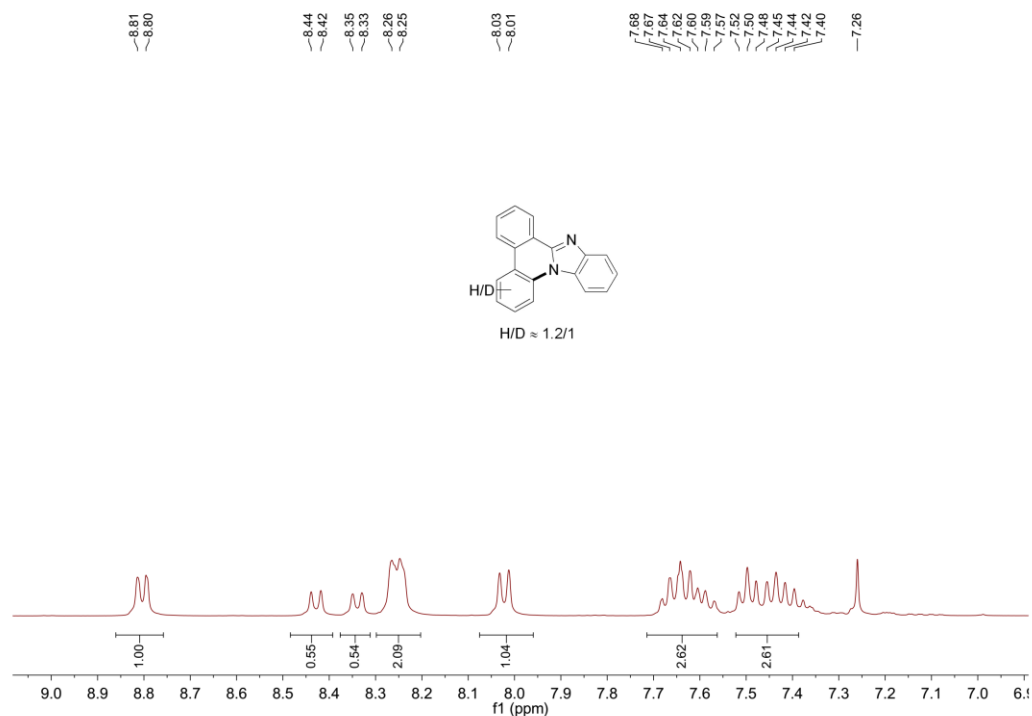

**Figure S5.** The <sup>1</sup>H NMR spectrum of mixed product under Condition A.

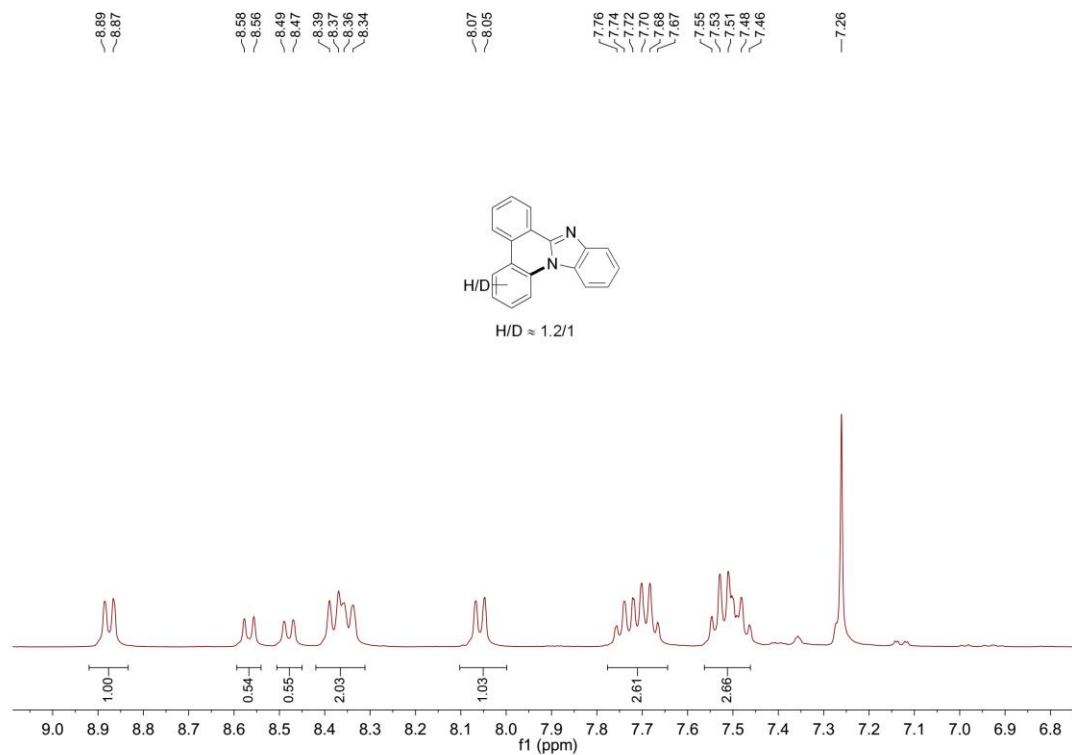

**Figure S5.** The  $^1\text{H}$  NMR spectrum of mixed product under Condition B.

#### Procedure for radical trapping experiments

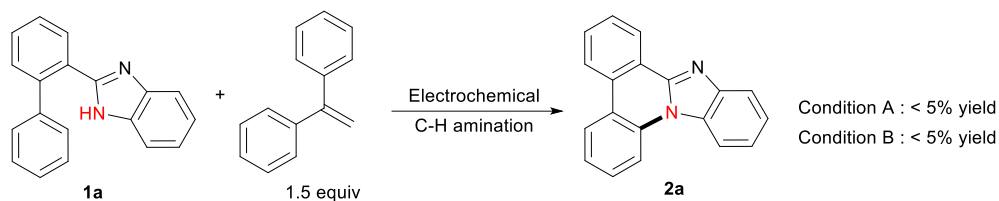

1,1-Diphenylethylene (1.5 mmol, 270 mg) was introduced to the reaction under Condition A and Condition B. The corresponding products were obtained with 5.2 mg (Condition A) and 5.7 mg (Condition B).

## 6. Crystal structure of 2z

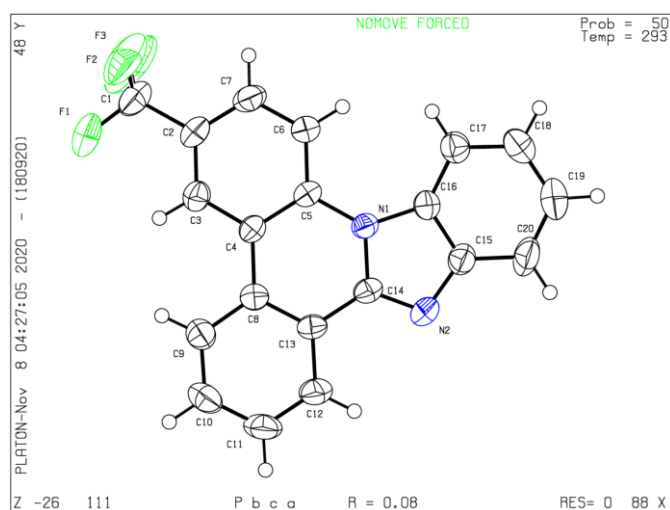

**Table S1. Crystal data and structure refinement for 2z.**

|                                   |                                                                                                                   |
|-----------------------------------|-------------------------------------------------------------------------------------------------------------------|
| Identification code               | 2z                                                                                                                |
| Empirical formula                 | C <sub>20</sub> H <sub>11</sub> F <sub>3</sub> N <sub>2</sub>                                                     |
| Formula weight                    | 336.31                                                                                                            |
| Temperature                       | 293(2) K                                                                                                          |
| Wavelength                        | 0.71073 Å                                                                                                         |
| Crystal system, space group       | Orthorhombic, Pbc <sub>a</sub>                                                                                    |
| Unit cell dimensions              | a = 9.2360(8) Å    alpha = 90 deg.<br>b = 17.7645(14) Å    beta = 90 deg.<br>c = 18.4265(15) Å    gamma = 90 deg. |
| Volume                            | 3023.3(4) Å <sup>3</sup>                                                                                          |
| Z, Calculated density             | 8, 1.478 Mg/m <sup>3</sup>                                                                                        |
| Absorption coefficient            | 0.114 mm <sup>-1</sup>                                                                                            |
| F(000)                            | 1376                                                                                                              |
| Crystal size                      | 0.25 x 0.21 x 0.14 mm                                                                                             |
| Theta range for data collection   | 3.123 to 27.666 deg.                                                                                              |
| Limiting indices                  | -12 ≤ h ≤ 11, -23 ≤ k ≤ 22, -23 ≤ l ≤ 24                                                                          |
| Reflections collected / unique    | 45226 / 3506 [R(int) = 0.1677]                                                                                    |
| Completeness to theta = 25.242    | 99.9 %                                                                                                            |
| Absorption correction             | Semi-empirical from equivalents                                                                                   |
| Max. and min. transmission        | 0.7456 and 0.6946                                                                                                 |
| Refinement method                 | Full-matrix least-squares on F <sup>2</sup>                                                                       |
| Data / restraints / parameters    | 3506 / 0 / 226                                                                                                    |
| Goodness-of-fit on F <sup>2</sup> | 1.014                                                                                                             |
| Final R indices [I > 2σ(I)]       | R <sub>1</sub> = 0.0795, wR <sub>2</sub> = 0.1475                                                                 |
| R indices (all data)              | R1 = 0.1866, wR2 = 0.1867                                                                                         |
| Extinction coefficient            | n/a                                                                                                               |
| Largest diff. peak and hole       | 0.260 and -0.309 e.Å <sup>-3</sup>                                                                                |



**Table S2. Atomic coordinates (  $\times 10^4$ ) and equivalent isotropic displacement parameters ( $\text{\AA}^2 \times 10^3$ ) for 2z.  $U(\text{eq})$  is defined as one third of the trace of the orthogonalized  $U_{ij}$  tensor.**

|       | x       | y       | z       | $U(\text{eq})$ |
|-------|---------|---------|---------|----------------|
| F(1)  | 2900(4) | 5597(2) | 4824(1) | 143(1)         |
| F(3)  | 3141(4) | 6643(2) | 5312(1) | 136(1)         |
| N(1)  | 6324(2) | 7340(1) | 2393(1) | 33(1)          |
| F(2)  | 4763(3) | 5856(2) | 5414(1) | 116(1)         |
| N(2)  | 6394(3) | 7531(2) | 1182(1) | 48(1)          |
| C(16) | 7297(3) | 7936(2) | 2274(2) | 35(1)          |
| C(14) | 5844(3) | 7125(2) | 1705(2) | 36(1)          |
| C(8)  | 4274(3) | 6167(2) | 2250(1) | 34(1)          |
| C(5)  | 5739(3) | 7023(2) | 3031(1) | 33(1)          |
| C(13) | 4847(3) | 6510(2) | 1629(1) | 36(1)          |
| C(4)  | 4707(3) | 6444(2) | 2964(1) | 33(1)          |
| C(3)  | 4119(3) | 6159(2) | 3603(2) | 41(1)          |
| C(6)  | 6139(3) | 7291(2) | 3711(2) | 43(1)          |
| C(7)  | 5536(4) | 6994(2) | 4330(2) | 49(1)          |
| C(15) | 7289(3) | 8038(2) | 1525(2) | 44(1)          |
| C(9)  | 3286(3) | 5574(2) | 2150(2) | 45(1)          |
| C(17) | 8180(3) | 8366(2) | 2722(2) | 45(1)          |
| C(2)  | 4525(3) | 6427(2) | 4276(2) | 44(1)          |
| C(12) | 4455(4) | 6260(2) | 938(2)  | 51(1)          |
| C(11) | 3495(4) | 5682(2) | 858(2)  | 58(1)          |
| C(10) | 2899(4) | 5342(2) | 1467(2) | 53(1)          |
| C(18) | 9015(4) | 8912(2) | 2392(2) | 55(1)          |
| C(20) | 8130(4) | 8599(2) | 1205(2) | 63(1)          |
| C(1)  | 3839(5) | 6128(2) | 4944(2) | 65(1)          |
| C(19) | 8983(4) | 9035(2) | 1652(2) | 66(1)          |

**Table S3. Bond lengths [Å] and angles [deg] for 2z.**

---

|                  |          |
|------------------|----------|
| F(1)-C(1)        | 1.301(4) |
| F(3)-C(1)        | 1.308(4) |
| N(1)-C(16)       | 1.406(3) |
| N(1)-C(14)       | 1.396(3) |
| N(1)-C(5)        | 1.411(3) |
| F(2)-C(1)        | 1.309(4) |
| N(2)-C(14)       | 1.306(4) |
| N(2)-C(15)       | 1.376(4) |
| C(16)-C(15)      | 1.393(4) |
| C(16)-C(17)      | 1.388(4) |
| C(14)-C(13)      | 1.435(4) |
| C(8)-C(13)       | 1.401(4) |
| C(8)-C(4)        | 1.462(4) |
| C(8)-C(9)        | 1.405(4) |
| C(5)-C(4)        | 1.407(4) |
| C(5)-C(6)        | 1.392(4) |
| C(13)-C(12)      | 1.396(4) |
| C(4)-C(3)        | 1.391(4) |
| C(3)-H(3)        | 0.9300   |
| C(3)-C(2)        | 1.380(4) |
| C(6)-H(6)        | 0.9300   |
| C(6)-C(7)        | 1.374(4) |
| C(7)-H(7)        | 0.9300   |
| C(7)-C(2)        | 1.376(4) |
| C(15)-C(20)      | 1.394(4) |
| C(9)-H(9)        | 0.9300   |
| C(9)-C(10)       | 1.372(4) |
| C(17)-H(17)      | 0.9300   |
| C(17)-C(18)      | 1.380(4) |
| C(2)-C(1)        | 1.484(4) |
| C(12)-H(12)      | 0.9300   |
| C(12)-C(11)      | 1.365(4) |
| C(11)-H(11)      | 0.9300   |
| C(11)-C(10)      | 1.387(5) |
| C(10)-H(10)      | 0.9300   |
| C(18)-H(18)      | 0.9300   |
| C(18)-C(19)      | 1.382(5) |
| C(20)-H(20)      | 0.9300   |
| C(20)-C(19)      | 1.378(5) |
| C(19)-H(19)      | 0.9300   |
| C(16)-N(1)-C(5)  | 132.4(2) |
| C(14)-N(1)-C(16) | 105.5(2) |

|                   |          |
|-------------------|----------|
| C(14)-N(1)-C(5)   | 121.7(2) |
| C(14)-N(2)-C(15)  | 104.8(2) |
| C(15)-C(16)-N(1)  | 104.4(2) |
| C(17)-C(16)-N(1)  | 134.3(3) |
| C(17)-C(16)-C(15) | 121.3(3) |
| N(1)-C(14)-C(13)  | 120.0(2) |
| N(2)-C(14)-N(1)   | 113.3(3) |
| N(2)-C(14)-C(13)  | 126.7(3) |
| C(13)-C(8)-C(4)   | 119.1(3) |
| C(13)-C(8)-C(9)   | 117.7(3) |
| C(9)-C(8)-C(4)    | 123.2(3) |
| C(4)-C(5)-N(1)    | 118.6(2) |
| C(6)-C(5)-N(1)    | 120.8(3) |
| C(6)-C(5)-C(4)    | 120.5(3) |
| C(8)-C(13)-C(14)  | 119.6(2) |
| C(12)-C(13)-C(14) | 119.9(3) |
| C(12)-C(13)-C(8)  | 120.5(3) |
| C(5)-C(4)-C(8)    | 120.6(2) |
| C(3)-C(4)-C(8)    | 122.2(3) |
| C(3)-C(4)-C(5)    | 117.2(3) |
| C(4)-C(3)-H(3)    | 119.1    |
| C(2)-C(3)-C(4)    | 121.9(3) |
| C(2)-C(3)-H(3)    | 119.1    |
| C(5)-C(6)-H(6)    | 119.7    |
| C(7)-C(6)-C(5)    | 120.6(3) |
| C(7)-C(6)-H(6)    | 119.7    |
| C(6)-C(7)-H(7)    | 120.1    |
| C(6)-C(7)-C(2)    | 119.8(3) |
| C(2)-C(7)-H(7)    | 120.1    |
| N(2)-C(15)-C(16)  | 111.9(2) |
| N(2)-C(15)-C(20)  | 127.5(3) |
| C(16)-C(15)-C(20) | 120.6(3) |
| C(8)-C(9)-H(9)    | 119.5    |
| C(10)-C(9)-C(8)   | 120.9(3) |
| C(10)-C(9)-H(9)   | 119.5    |
| C(16)-C(17)-H(17) | 121.5    |
| C(18)-C(17)-C(16) | 117.0(3) |
| C(18)-C(17)-H(17) | 121.5    |
| C(3)-C(2)-C(1)    | 120.4(3) |
| C(7)-C(2)-C(3)    | 120.1(3) |
| C(7)-C(2)-C(1)    | 119.5(3) |
| C(13)-C(12)-H(12) | 119.8    |
| C(11)-C(12)-C(13) | 120.4(3) |
| C(11)-C(12)-H(12) | 119.8    |

|                   |          |
|-------------------|----------|
| C(12)-C(11)-H(11) | 120.1    |
| C(12)-C(11)-C(10) | 119.8(3) |
| C(10)-C(11)-H(11) | 120.1    |
| C(9)-C(10)-C(11)  | 120.5(3) |
| C(9)-C(10)-H(10)  | 119.7    |
| C(11)-C(10)-H(10) | 119.7    |
| C(17)-C(18)-H(18) | 118.9    |
| C(17)-C(18)-C(19) | 122.2(3) |
| C(19)-C(18)-H(18) | 118.9    |
| C(15)-C(20)-H(20) | 121.0    |
| C(19)-C(20)-C(15) | 117.9(3) |
| C(19)-C(20)-H(20) | 121.0    |
| F(1)-C(1)-F(3)    | 105.5(4) |
| F(1)-C(1)-F(2)    | 106.3(3) |
| F(1)-C(1)-C(2)    | 113.8(3) |
| F(3)-C(1)-F(2)    | 103.6(3) |
| F(3)-C(1)-C(2)    | 113.0(3) |
| F(2)-C(1)-C(2)    | 113.8(3) |
| C(18)-C(19)-H(19) | 119.6    |
| C(20)-C(19)-C(18) | 120.9(3) |
| C(20)-C(19)-H(19) | 119.6    |

---

Symmetry transformations used to generate equivalent atoms:

**Table S4. Anisotropic displacement parameters ( $\text{\AA}^2 \times 10^3$ ) for 2z. The anisotropic displacement factor exponent takes the form:  $-2 \pi^2 [ h^2 a^{*2} U_{11} + \dots + 2 h k a^* b^* U_{12} ]$**

|       | U11    | U22    | U33   | U23   | U13    | U12     |
|-------|--------|--------|-------|-------|--------|---------|
| F(1)  | 178(3) | 190(3) | 62(2) | 16(2) | 30(2)  | -116(3) |
| F(3)  | 187(3) | 144(2) | 78(2) | 17(2) | 86(2)  | 57(2)   |
| N(1)  | 33(1)  | 38(1)  | 29(1) | 0(1)  | -1(1)  | 0(1)    |
| F(2)  | 120(2) | 161(3) | 67(2) | 65(2) | 6(2)   | 7(2)    |
| N(2)  | 57(2)  | 56(2)  | 31(1) | 8(1)  | 0(1)   | -9(2)   |
| C(16) | 30(2)  | 35(2)  | 40(2) | 1(1)  | 2(1)   | 2(1)    |
| C(14) | 38(2)  | 43(2)  | 29(2) | 1(1)  | -3(1)  | 3(2)    |
| C(8)  | 32(2)  | 35(2)  | 34(2) | 0(1)  | -3(1)  | 5(1)    |
| C(5)  | 34(2)  | 37(2)  | 28(2) | 1(1)  | 1(1)   | 5(1)    |
| C(13) | 38(2)  | 39(2)  | 30(2) | -1(1) | -6(1)  | 4(2)    |
| C(4)  | 31(2)  | 35(2)  | 32(2) | 1(1)  | 4(1)   | 5(1)    |
| C(3)  | 39(2)  | 43(2)  | 40(2) | 2(1)  | 6(1)   | 0(2)    |
| C(6)  | 50(2)  | 47(2)  | 33(2) | -1(2) | -2(2)  | -7(2)   |
| C(7)  | 61(2)  | 55(2)  | 30(2) | -3(2) | 1(2)   | 1(2)    |
| C(15) | 44(2)  | 46(2)  | 41(2) | 8(2)  | 2(2)   | -3(2)   |
| C(9)  | 45(2)  | 42(2)  | 48(2) | 1(2)  | -3(2)  | -4(2)   |
| C(17) | 43(2)  | 44(2)  | 48(2) | -1(2) | 3(2)   | -2(2)   |
| C(2)  | 49(2)  | 49(2)  | 33(2) | 5(2)  | 8(2)   | 4(2)    |
| C(12) | 64(2)  | 54(2)  | 35(2) | 1(2)  | -11(2) | -6(2)   |
| C(11) | 73(3)  | 57(2)  | 43(2) | -7(2) | -23(2) | -5(2)   |
| C(10) | 58(2)  | 42(2)  | 60(2) | -6(2) | -15(2) | -8(2)   |
| C(18) | 48(2)  | 48(2)  | 68(3) | -7(2) | 0(2)   | -10(2)  |
| C(20) | 70(3)  | 64(2)  | 54(2) | 24(2) | 9(2)   | -14(2)  |
| C(1)  | 81(3)  | 75(3)  | 39(2) | 7(2)  | 15(2)  | -7(2)   |
| C(19) | 59(2)  | 61(2)  | 79(3) | 12(2) | 11(2)  | -19(2)  |

**Table S5. Hydrogen coordinates ( x 10<sup>4</sup>) and isotropic displacement parameters (A<sup>2</sup> x 10<sup>3</sup>) for 2z.**

|       | x    | y    | z    | U(eq) |
|-------|------|------|------|-------|
| H(3)  | 3432 | 5777 | 3576 | 49    |
| H(6)  | 6820 | 7675 | 3748 | 52    |
| H(7)  | 5810 | 7174 | 4783 | 58    |
| H(9)  | 2889 | 5336 | 2553 | 54    |
| H(17) | 8208 | 8289 | 3221 | 54    |
| H(12) | 4850 | 6489 | 529  | 61    |
| H(11) | 3241 | 5516 | 397  | 69    |
| H(10) | 2232 | 4954 | 1411 | 64    |
| H(18) | 9619 | 9208 | 2679 | 66    |
| H(20) | 8115 | 8677 | 706  | 76    |
| H(19) | 9545 | 9417 | 1453 | 80    |

**Table S6. Torsion angles [deg] for 2z.**

---

|                         |           |
|-------------------------|-----------|
| N(1)-C(16)-C(15)-N(2)   | -1.3(3)   |
| N(1)-C(16)-C(15)-C(20)  | 179.1(3)  |
| N(1)-C(16)-C(17)-C(18)  | 179.5(3)  |
| N(1)-C(14)-C(13)-C(8)   | 4.9(4)    |
| N(1)-C(14)-C(13)-C(12)  | -175.2(3) |
| N(1)-C(5)-C(4)-C(8)     | 1.3(4)    |
| N(1)-C(5)-C(4)-C(3)     | -178.1(2) |
| N(1)-C(5)-C(6)-C(7)     | 178.2(3)  |
| N(2)-C(14)-C(13)-C(8)   | -175.3(3) |
| N(2)-C(14)-C(13)-C(12)  | 4.6(5)    |
| N(2)-C(15)-C(20)-C(19)  | -178.3(3) |
| C(16)-N(1)-C(14)-N(2)   | -1.2(3)   |
| C(16)-N(1)-C(14)-C(13)  | 178.6(2)  |
| C(16)-N(1)-C(5)-C(4)    | 176.5(3)  |
| C(16)-N(1)-C(5)-C(6)    | -1.6(4)   |
| C(16)-C(15)-C(20)-C(19) | 1.2(5)    |
| C(16)-C(17)-C(18)-C(19) | 0.2(5)    |
| C(14)-N(1)-C(16)-C(15)  | 1.4(3)    |
| C(14)-N(1)-C(16)-C(17)  | -176.5(3) |
| C(14)-N(1)-C(5)-C(4)    | 3.8(4)    |
| C(14)-N(1)-C(5)-C(6)    | -174.3(3) |
| C(14)-N(2)-C(15)-C(16)  | 0.6(4)    |
| C(14)-N(2)-C(15)-C(20)  | -179.9(3) |
| C(14)-C(13)-C(12)-C(11) | -179.2(3) |
| C(8)-C(13)-C(12)-C(11)  | 0.7(5)    |
| C(8)-C(4)-C(3)-C(2)     | -179.6(3) |
| C(8)-C(9)-C(10)-C(11)   | 1.0(5)    |
| C(5)-N(1)-C(16)-C(15)   | -172.2(3) |
| C(5)-N(1)-C(16)-C(17)   | 9.9(5)    |
| C(5)-N(1)-C(14)-N(2)    | 173.2(2)  |
| C(5)-N(1)-C(14)-C(13)   | -7.0(4)   |
| C(5)-C(4)-C(3)-C(2)     | -0.2(4)   |
| C(5)-C(6)-C(7)-C(2)     | -0.2(5)   |
| C(13)-C(8)-C(4)-C(5)    | -3.2(4)   |
| C(13)-C(8)-C(4)-C(3)    | 176.2(3)  |
| C(13)-C(8)-C(9)-C(10)   | 0.0(4)    |
| C(13)-C(12)-C(11)-C(10) | 0.3(5)    |
| C(4)-C(8)-C(13)-C(14)   | 0.0(4)    |
| C(4)-C(8)-C(13)-C(12)   | -179.9(3) |
| C(4)-C(8)-C(9)-C(10)    | 179.0(3)  |
| C(4)-C(5)-C(6)-C(7)     | 0.2(4)    |

|                         |           |
|-------------------------|-----------|
| C(4)-C(3)-C(2)-C(7)     | 0.2(5)    |
| C(4)-C(3)-C(2)-C(1)     | 177.9(3)  |
| C(3)-C(2)-C(1)-F(1)     | 2.1(5)    |
| C(3)-C(2)-C(1)-F(3)     | -118.2(4) |
| C(3)-C(2)-C(1)-F(2)     | 124.0(4)  |
| C(6)-C(5)-C(4)-C(8)     | 179.4(3)  |
| C(6)-C(5)-C(4)-C(3)     | 0.0(4)    |
| C(6)-C(7)-C(2)-C(3)     | 0.0(5)    |
| C(6)-C(7)-C(2)-C(1)     | -177.8(3) |
| C(7)-C(2)-C(1)-F(1)     | 179.8(4)  |
| C(7)-C(2)-C(1)-F(3)     | 59.5(5)   |
| C(7)-C(2)-C(1)-F(2)     | -58.3(5)  |
| C(15)-N(2)-C(14)-N(1)   | 0.4(3)    |
| C(15)-N(2)-C(14)-C(13)  | -179.4(3) |
| C(15)-C(16)-C(17)-C(18) | 1.8(4)    |
| C(15)-C(20)-C(19)-C(18) | 0.8(6)    |
| C(9)-C(8)-C(13)-C(14)   | 179.1(3)  |
| C(9)-C(8)-C(13)-C(12)   | -0.8(4)   |
| C(9)-C(8)-C(4)-C(5)     | 177.8(3)  |
| C(9)-C(8)-C(4)-C(3)     | -2.8(4)   |
| C(17)-C(16)-C(15)-N(2)  | 177.0(3)  |
| C(17)-C(16)-C(15)-C(20) | -2.6(5)   |
| C(17)-C(18)-C(19)-C(20) | -1.5(6)   |
| C(12)-C(11)-C(10)-C(9)  | -1.1(5)   |

---

Symmetry transformations used to generate equivalent atoms:

**Table S7. Hydrogen bonds for 2z [A and deg.].**

---

| D-H...A                           | D-H) | d(H...A) | d(D...A)  | <(DHA) |
|-----------------------------------|------|----------|-----------|--------|
| C(3) --H(3) ..F(1) [            ] | 0.93 | 2.37     | 2.7067(2) | 101    |
| C(6) --H(6) ..F(3) [ 3455.01]     | 0.93 | 2.44     | 3.2010(3) | 139    |
| C(11) --H(11) ..F(1) [ 2655.01]   | 0.93 | 2.48     | 3.2325(3) | 139    |



## 7. Photoluminescence spectra of 2m and 2n

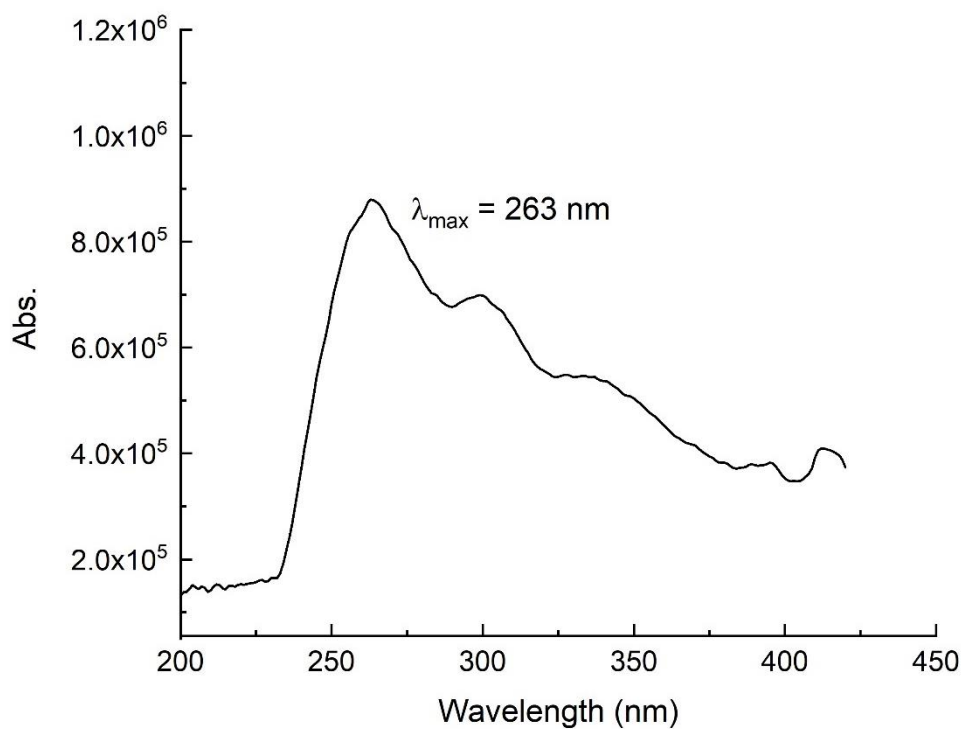

Figure S6. Photoluminescence absorption spectrum of **2m** in solid powders

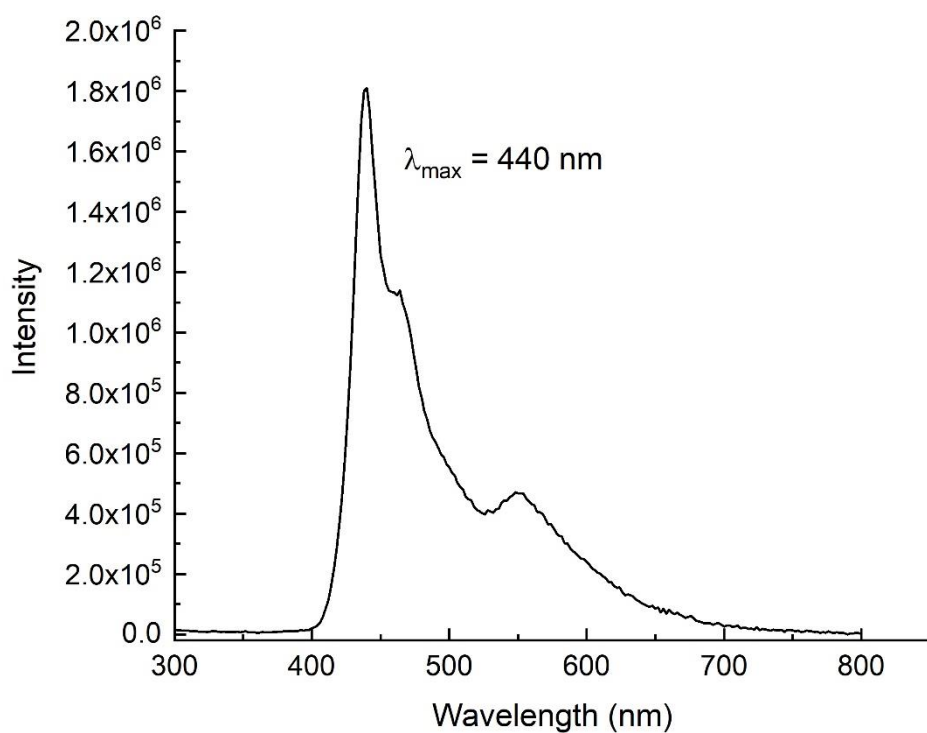

Figure S7. Photoluminescence emission spectrum of **2m** in solid powders upon excitation at 263 nm

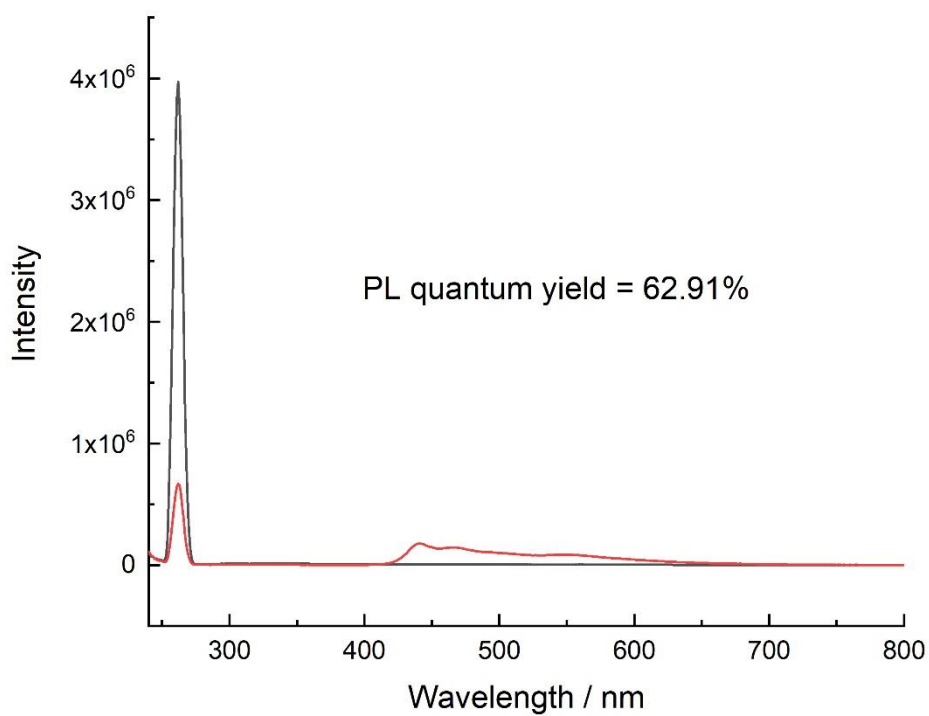

**Figure S8.** Photoluminescence quantum yield of **2m** in solid powders upon excitation at 263 nm.

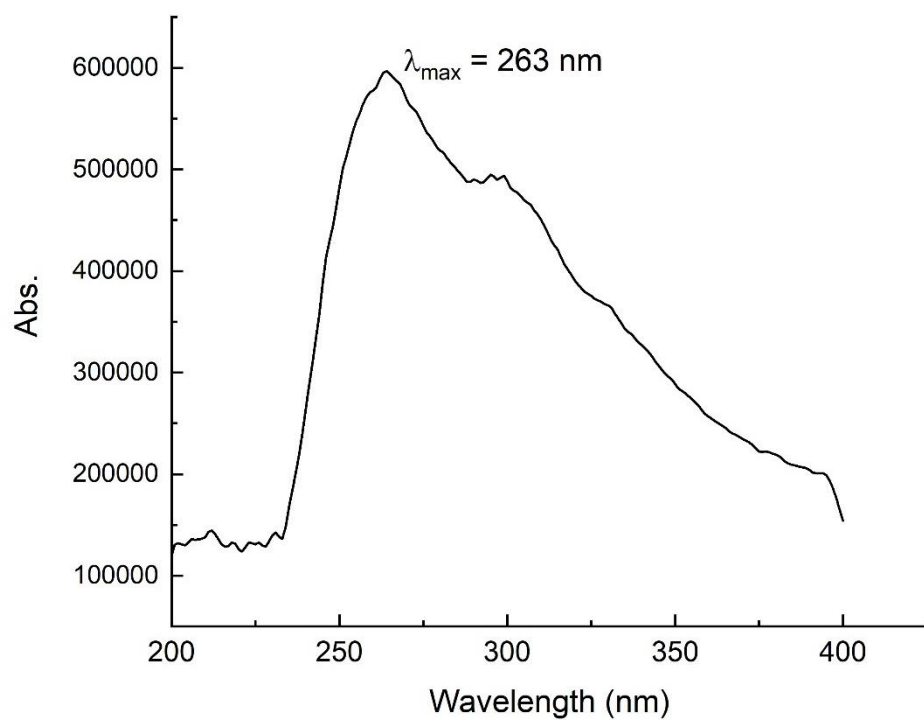

**Figure S9.** Photoluminescence absorption spectrum of **2n** in solid powders

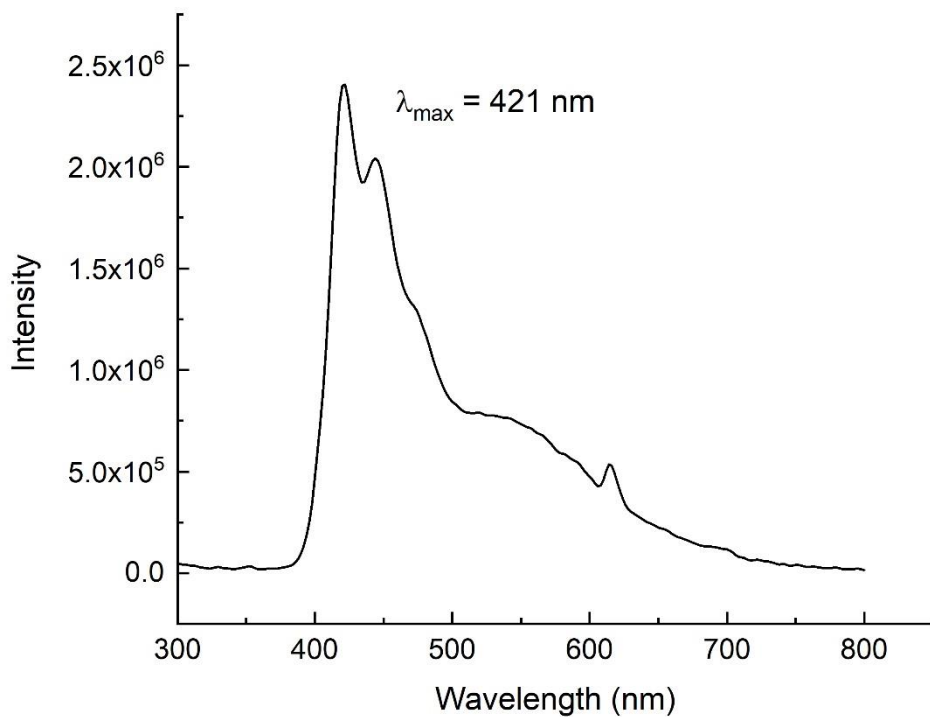

**Figure S10.** Photoluminescence emission spectrum of **2n** in solid powders upon excitation at 263 nm

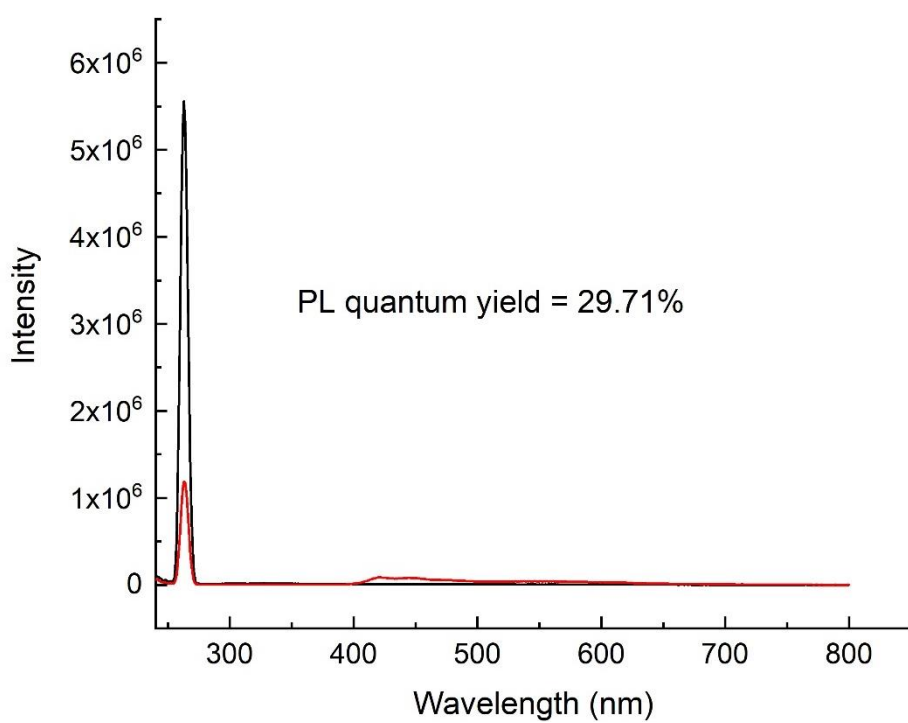

**Figure S11.** Photoluminescence quantum yield of **2n** in solid powders upon excitation at 263 nm.

## 7. Experimental data for C-H amination products

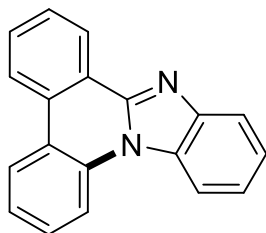

Benzo[4,5]imidazo[1,2-*f*]phenanthridine (**2a**): Condition A: 123 mg, 92% yield; Condition B: 118 mg, 88% yield; white solid, m.p. 156-158 °C; <sup>1</sup>H NMR (400 MHz, CDCl<sub>3</sub>): 8.88 (d, *J* = 8 Hz, 1H), 8.57 (d, *J* = 8 Hz, 1H), 8.49 (d, *J* = 8 Hz, 1H), 8.37 (dd, *J* = 12 Hz, *J* = 8 Hz, 2H), 8.06 (d, *J* = 8 Hz, 1H), 7.72 (m, 3H), 7.50 (m, 3H); <sup>13</sup>C NMR (100 MHz, CDCl<sub>3</sub>): 147.4, 144.5, 134.3, 131.8, 130.3, 129.4, 129.0, 128.5, 126.0, 124.3, 124.09, 124.06, 123.4, 122.9, 122.2, 121.6, 120.3, 115.9, 113.9; These data are in accordance with the literature.<sup>[2]</sup>

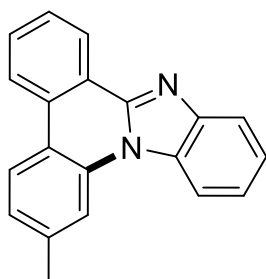

2-Methylbenzo[4,5]imidazo[1,2-*f*]phenanthridine (**2b**): Condition A: 100 mg, 71% yield; Condition B: 130 mg, 92% yield; white solid, m.p. 187-189 °C; <sup>1</sup>H NMR (400 MHz, CDCl<sub>3</sub>): 8.81 (d, *J* = 8 Hz, 1H), 8.26 (m, 4H), 8.02 (d, *J* = 8 Hz, 1H), 7.64 (m, 2H), 7.48 (m, 2H), 7.22 (d, *J* = 8 Hz, 1H), 2.56 (s, 3H); <sup>13</sup>C NMR (100 MHz, CDCl<sub>3</sub>): 147.4, 144.0, 139.4, 134.0, 131.5, 130.3, 129.5, 127.9, 125.8, 125.4, 124.0, 123.7, 122.7, 122.4, 121.8, 119.8, 118.9, 115.9, 113.9, 21.7; These data are in accordance with the literature.<sup>[2]</sup>

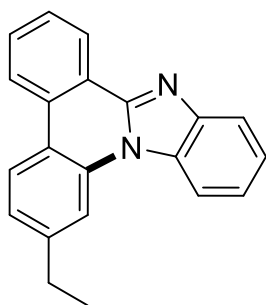

2-Ethylbenzo[4,5]imidazo[1,2-*f*]phenanthridine (**2c**): Condition A: 95 mg, 64% yield; Condition B: 130 mg, 88% yield; white solid, m.p. 158-160 °C; <sup>1</sup>H NMR (400 MHz, CDCl<sub>3</sub>): 8.75 (d, *J* = 4Hz, 1H), 8.14 (m, 4H), 7.99 (d, *J* = 8 Hz, 1H), 7.56 (m, 2H), 7.46 (t, *J* = 8 Hz, 1H), 7.40 (t, *J* = 8 Hz, 1H), 7.13 (d, *J* = 8 Hz, 1H), 2.77 (q, *J* = 8 Hz, 2H), 1.33 (t, *J* = 8 Hz, 3H); <sup>13</sup>C NMR (100 MHz, CDCl<sub>3</sub>): 147.5, 145.6, 144.5, 134.3, 131.8, 130.1, 129.5, 127.9, 125.8, 124.1, 123.9, 122.9, 122.6, 121.8, 120.2, 119.1, 114.8, 113.8, 28.9, 15.3; These data are in accordance with the literature.<sup>[1]</sup>

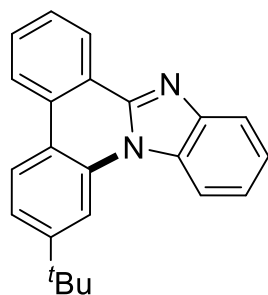

2-(*tert*-Butyl)benzo[4,5]imidazo[1,2-*f*]phenanthridine (**2d**): Condition A: 112 mg, 69% yield; Condition B: 146 mg, 90% yield; white solid, m.p. 144-146 °C;  $^1\text{H}$  NMR (400 MHz,  $\text{CDCl}_3$ ): 8.85 (d,  $J = 8.0$  Hz, 1H), 8.60 (s, 1H), 8.39 (d,  $J = 8.0$  Hz, 1H), 8.34 (t,  $J = 6.0$  Hz, 2H), 8.05 (d,  $J = 8.0$  Hz, 1H), 7.71 (t,  $J = 8.0$  Hz, 1H), 7.64 (t,  $J = 8.0$  Hz, 1H), 7.52 (m, 3H), 1.53 (s, 9H);  $^{13}\text{C}$  NMR (100 MHz,  $\text{CDCl}_3$ ): 152.9, 147.8, 144.6, 134.4, 131.8, 130.4, 129.6, 128.2, 126.0, 124.0, 123.9, 123.1, 122.9, 122.1, 122.1, 120.4, 119.2, 113.8, 112.9, 35.4, 31.4; HRMS (ESI): calcd for  $\text{C}_{23}\text{H}_{21}\text{N}_2^+$  ( $\text{M}+\text{H}$ ) $^+$  325.1699, found 325.1700.

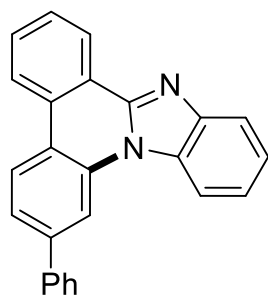

2-Phenylbenzo[4,5]imidazo[1,2-*f*]phenanthridine (**2e**): Condition A: 124 mg, 72% yield; Condition B: 99 mg, 57% yield; white solid, m.p. 233-235 °C;  $^1\text{H}$  NMR (400 MHz,  $\text{CDCl}_3$ ): 8.76 (d,  $J = 4.0$  Hz, 1H), 8.55 (s, 1H), 8.28 (d,  $J = 8$  Hz, 1H), 8.20 (t,  $J = 8$  Hz, 2H), 7.99 (d,  $J = 8$  Hz, 1H), 7.68 (d,  $J = 8$  Hz, 2H), 7.56 (m, 5H), 7.44 (m, 3H);  $^{13}\text{C}$  NMR (100 MHz,  $\text{CDCl}_3$ ): 147.4, 144.5, 141.8, 139.9, 134.6, 131.7, 130.2, 129.1, 128.3, 128.1, 127.2, 125.9, 124.4, 124.0, 123.2, 123.0, 122.8, 122.0, 120.4, 120.3, 114.1, 113.8; HRMS (ESI): calcd for  $\text{C}_{25}\text{H}_{17}\text{N}_2^+$  ( $\text{M}+\text{H}$ ) $^+$  345.1386, found 345.1386.

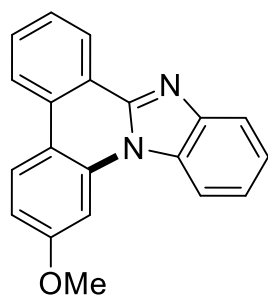

2-Methoxybenzo[4,5]imidazo[1,2-*f*]phenanthridine (**2f**): Condition A: 111 mg, 75% yield; Condition B: 113 mg, 76% yield; white solid, m.p. 147-149 °C;  $^1\text{H}$  NMR (400 MHz,  $\text{CDCl}_3$ ): 8.82 (d,  $J = 8.0$  Hz, 1H), 8.32 (t,  $J = 8.0$  Hz, 1H), 8.26 (m, 2H), 8.04 (d,  $J = 8.0$  Hz, 1H), 7.98 (s, 1H), 7.68 (t,  $J = 8.0$  Hz, 1H), 7.60 (t,  $J = 8.0$  Hz, 1H), 7.52 (t,  $J = 6.0$  Hz, 1H), 7.46 (t,  $J = 8.0$  Hz, 1H), 7.03 (d,  $J = 8.0$  Hz, 1H), 4.00 (s, 3H);  $^{13}\text{C}$  NMR (100 MHz,  $\text{CDCl}_3$ ): 160.2, 147.8, 144.5, 135.3, 131.6, 130.3, 129.6, 127.4, 125.9, 125.2, 124.0, 122.7, 122.1, 121.5, 120.2, 114.8, 113.6, 110.6, 101.1, 55.6; These data are in accordance with the literature.<sup>[2]</sup>

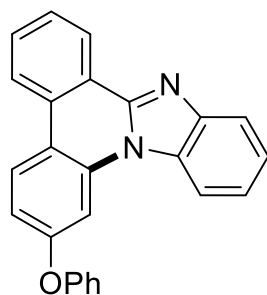

2-Phenoxybenzo[4,5]imidazo[1,2-f]phenanthridine (**2g**): Condition A: 107 mg, 59% yield; Condition B: 124 mg, 69% yield; white solid, m.p. 238-240 °C;  $^1\text{H}$  NMR (400 MHz,  $\text{CDCl}_3$ ): 8.85 (d,  $J = 8.0$  Hz, 1H), 8.40 (d,  $J = 8.0$  Hz, 1H), 8.29 (d,  $J = 8.0$  Hz, 1H), 8.15 (s, 1H), 8.03 (q,  $J = 4.0$  Hz, 2H), 7.72 (t,  $J = 6.0$  Hz, 1H), 7.64 (t,  $J = 8.0$  Hz, 1H), 7.49 (m, 3H), 7.38 (t,  $J = 8.0$  Hz, 1H), 7.27 (d,  $J = 8.0$  Hz, 1H), 7.21 (d,  $J = 8.0$  Hz, 2H), 7.14 (d,  $J = 8.0$  Hz, 1H);  $^{13}\text{C}$  NMR (100 MHz,  $\text{CDCl}_3$ ): 158.7, 156.1, 147.8, 144.6, 135.5, 131.7, 130.5, 130.2, 129.5, 128.0, 126.1, 125.7, 124.5, 124.2, 122.9, 122.7, 121.9, 120.4, 119.9, 116.8, 114.5, 113.6, 105.4; HRMS (ESI): calcd for  $\text{C}_{25}\text{H}_{17}\text{N}_2\text{O}^+$  ( $\text{M}+\text{H}$ ) $^+$  361.1335, found 361.1335.

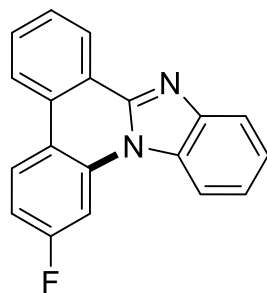

2-Fluorobenzo[4,5]imidazo[1,2-f]phenanthridine (**2h**): Condition A: 135 mg, 94% yield; Condition B: 118 mg, 82% yield; white solid, m.p. 186-188 °C;  $^1\text{H}$  NMR (400 MHz,  $\text{CDCl}_3$ ): 8.84 (d,  $J = 8.0$  Hz, 1H), 8.43 (dd,  $J = 8.0$  Hz,  $J = 8.0$  Hz, 1H), 8.26 (m, 3H), 8.04 (d,  $J = 8.0$  Hz, 1H), 7.73 (t,  $J = 8.0$  Hz, 1H), 7.66 (t,  $J = 8.0$  Hz, 1H), 7.52 (m, 2H), 7.22 (m, 1H);  $^{19}\text{F}$  NMR (376 MHz,  $\text{CDCl}_3$ ): -109.5;  $^{13}\text{C}$  NMR (100 MHz,  $\text{CDCl}_3$ ): 162.6 (d,  $J_{\text{F-C}} = 247$  Hz), 147.2, 143.8, 134.7 (d,  $J_{\text{F-C}} = 10$  Hz), 131.1, 130.6, 128.8, 128.3, 125.82, 125.78, 125.7, 124.6, 123.3, 122.1, 121.8, 120.0, 117.8, 112.0 (d,  $J_{\text{F-C}} = 22$  Hz), 103.0 (d,  $J_{\text{F-C}} = 27$  Hz); These data are in accordance with the literature.<sup>[1]</sup>

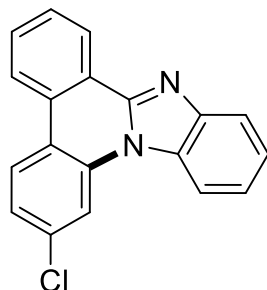

2-Chlorobenzo[4,5]imidazo[1,2-f]phenanthridine (**2i**): Condition A: 139 mg, 92% yield; Condition B: 109 mg, 72% yield; white solid, m.p. 215-217 °C;  $^1\text{H}$  NMR (400 MHz,  $\text{CDCl}_3$ ): 8.81 (d,  $J = 8.0$  Hz, 1H), 8.46 (s, 1H), 8.31 (d,  $J = 12.0$  Hz, 1H), 8.23 (t,  $J = 8.0$  Hz, 2H), 8.02 (d,  $J = 8.0$  Hz, 1H), 7.67 (m, 2H), 7.51 (m, 2H), 7.42 (d,  $J = 8.0$  Hz, 1H);  $^{13}\text{C}$  NMR (100 MHz,  $\text{CDCl}_3$ ): 147.2, 143.7, 135.0, 134.5, 131.2, 130.8, 128.9, 128.7,

126.0, 125.2, 124.8, 124.7, 123.5, 122.5, 122.1, 120.1, 120.0, 116.0, 113.7; HRMS (ESI): calcd for  $C_{19}H_{12}ClN_2^+$  (M+H) $^+$  303.0684, found 303.0686.

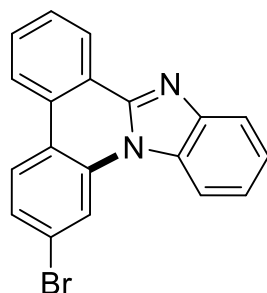

2-Bromobenzo[4,5]imidazo[1,2-f]phenanthridine (**2j**): Condition A: 125 mg, 72% yield; Condition B: 145 mg, 84% yield; white solid, m.p. 221-223°C;  $^1H$  NMR (400 MHz,  $CDCl_3$ ): 8.85 (d,  $J = 4.0$  Hz, 1H), 8.68 (s, 1H), 8.29 (m, 3H), 8.05 (d,  $J = 4.0$  Hz, 1H), 7.72 (m, 2H), 7.61 (d,  $J = 8.0$  Hz, 1H), 7.53 (m, 2H);  $^{13}C$  NMR (100 MHz,  $CDCl_3$ ): 146.9, 144.3, 134.6, 131.2, 130.3, 128.7, 128.3, 127.1, 125.8, 125.0, 124.3, 123.1, 122.9, 122.7, 121.8, 120.4, 120.2, 118.5, 113.5; HRMS (ESI): calcd for  $C_{19}H_{12}BrN_2^+$  (M+H) $^+$  347.0178, found 347.0181.

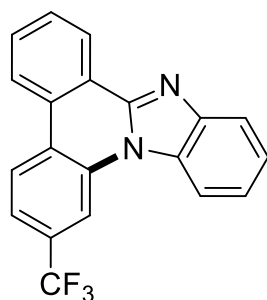

2-(Trifluoromethyl)benzo[4,5]imidazo[1,2-f]phenanthridine (**2k**): Condition A: 124 mg, 74% yield; Condition B: trace; white solid, m.p. 217-219 °C;  $^1H$  NMR (400 MHz,  $CDCl_3$ ): 8.80 (d,  $J = 8.0$  Hz, 1H), 8.71 (s, 1H), 8.49 (d,  $J = 8.0$  Hz, 1H), 8.31 (d,  $J = 8.0$  Hz, 1H), 8.22 (d,  $J = 8.0$  Hz, 1H), 8.02 (d,  $J = 8.0$  Hz, 1H), 7.70 (m, 3H), 7.52 (m, 2H);  $^{19}F$  NMR (376 MHz,  $CDCl_3$ ): -62.3;  $^{13}C$  NMR (100 MHz,  $CDCl_3$ ): 147.2, 144.5, 134.2, 131.6, 131.3, 130.8 (q,  $J_{F-C} = 33.0$  Hz), 130.7, 129.8, 128.2, 126.2, 124.9, 124.6, 124.5, 124.1, 123.8 (q,  $J_{F-C} = 270.0$  Hz), 123.6, 122.7, 120.7, 113.5, 113.0 (q,  $J_{F-C} = 4.0$  Hz); These data are in accordance with the literature.<sup>[2]</sup>

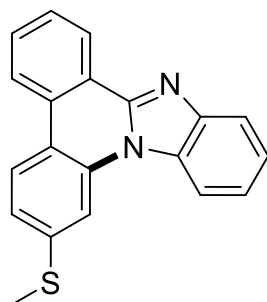

2-(Methylthio)benzo[4,5]imidazo[1,2-f]phenanthridine (**2l**): Condition A: 25 mg, 16% yield; Condition B: trace; white solid, m.p. 196-197 °C;  $^1H$  NMR (400 MHz,  $CDCl_3$ ): 8.75 (d,  $J = 8.0$  Hz, 1H), 8.16 (m, 4H), 8.00

(d,  $J = 8.0$  Hz, 1H), 7.60 (m, 2H), 7.46 (m, 2H), 7.18 (d,  $J = 8.0$  Hz, 1H), 2.62 (s, 3H);  $^{13}\text{C}$  NMR (100 MHz,  $\text{CDCl}_3$ ): 147.6, 144.6, 140.8, 134.7, 131.7, 130.4, 129.3, 128.2, 126.0, 124.3, 124.2, 123.0, 122.9, 122.0, 121.8, 120.4, 118.5, 113.7, 112.7, 15.7; HRMS (ESI): calcd for  $\text{C}_{20}\text{H}_{15}\text{N}_2\text{S}^+$  ( $\text{M}+\text{H}$ ) $^+$  315.0951, found 315.0952.

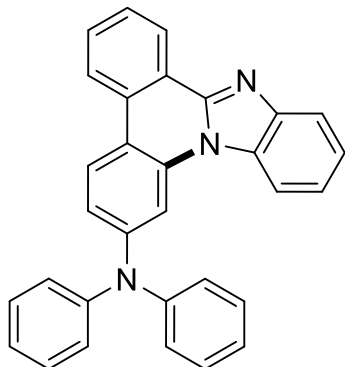

*N,N*-Diphenylbenzo[4,5]imidazo[1,2-*f*]phenanthridin-2-amine (**2m**): Condition A: 118 mg, 54% yield; Condition B: 65 mg, 30% yield; white solid, m.p. 250-251 °C;  $^1\text{H}$  NMR (400 MHz,  $\text{CDCl}_3$ ): 8.82 (d,  $J = 8.0$  Hz, 1H), 8.25 (t,  $J = 8.0$  Hz, 2H), 8.15 (d,  $J = 4.0$  Hz, 1H), 7.99 (d,  $J = 8.0$  Hz, 1H), 7.68 (t,  $J = 8.0$  Hz, 1H), 7.58 (m, 2H), 7.41 (m, 5H), 7.31 (d,  $J = 8.0$  Hz, 4H), 7.20 (m, 4H);  $^{13}\text{C}$  NMR (100 MHz,  $\text{CDCl}_3$ ): 149.1, 147.8, 146.8, 144.6, 135.2, 131.7, 130.4, 129.8, 127.4, 126.0, 125.7, 124.97, 124.5, 123.9, 122.6, 122.3, 121.6, 120.2, 117.6, 115.1, 113.4, 108.0; HRMS (ESI): calcd for  $\text{C}_{31}\text{H}_{22}\text{N}_3^+$  ( $\text{M}+\text{H}$ ) $^+$  436.1808, found 436.1809.

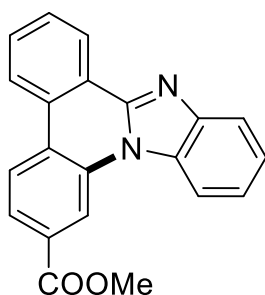

Methyl benzo[4,5]imidazo[1,2-*f*]phenanthridine-2-carboxylate (**2n**): Condition A: 111 mg, 68% yield; Condition B: trace; white solid, m.p. 225-227 °C;  $^1\text{H}$  NMR (400 MHz,  $\text{CDCl}_3$ ): 8.8 (s, 1H), 8.61 (m, 1H), 8.08 (t,  $J = 8.0$  Hz, 2H), 8.00 (m, 1H), 7.92 (d,  $J = 8.0$  Hz, 1H), 7.77 (d,  $J = 8.0$  Hz, 1H), 7.54 (m, 2H), 7.53 (m, 2H), 3.97 (s, 3H);  $^{13}\text{C}$  NMR (100 MHz,  $\text{CDCl}_3$ ): 165.9, 146.8, 144.3, 133.6, 131.5, 130.3, 129.8, 129.4, 128.2, 125.9, 124.9, 124.5, 124.3, 123.80, 123.76, 123.3, 122.6, 120.4, 116.8, 113.8, 52.6; HRMS (ESI): calcd for  $\text{C}_{21}\text{H}_{15}\text{N}_2\text{O}_2^+$  ( $\text{M}+\text{H}$ ) $^+$  327.1128, found 327.1128.

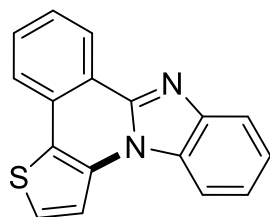

Benzo[4,5]imidazo[2,1-*a*]thieno[3,2-*c*]isoquinoline (**2o**): Condition A: 96 mg, 70% yield; Condition B: 82 mg, 60% yield; white solid, m.p. 108-110 °C;  $^1\text{H}$  NMR (400 MHz,  $\text{CDCl}_3$ ): 8.76 (d,  $J = 8.0$  Hz, 1H), 7.97 (m,



2H), 7.84 (d,  $J = 4$  Hz, 1H), 7.76 (d,  $J = 8.0$  Hz, 1H), 7.57 (m, 3H), 7.47 (t,  $J = 8.0$  Hz, 1H), 7.39 (t,  $J = 8.0$  Hz, 1H);  $^{13}\text{C}$  NMR (100 MHz,  $\text{CDCl}_3$ ): 147.1, 143.3, 133.3, 130.3, 128.1, 127.4, 126.4, 125.9, 124.1, 123.1, 122.5, 122.4, 120.8, 119.9, 116.7, 112.0; HRMS (ESI): calcd for  $\text{C}_{17}\text{H}_{11}\text{N}_2\text{S}^+$  ( $\text{M}+\text{H}$ ) $^+$  275.0638, found 275.0639.

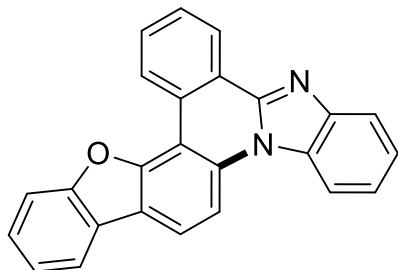

Benzo[4,5]imidazo[1,2-f]benzofuro[2,3-a]phenanthridine (**2p**): Condition A: 122 mg, 68% yield; Condition B: 130 mg, 73% yield; white solid, m.p. 247-249 °C;  $^1\text{H}$  NMR (400 MHz,  $\text{CDCl}_3$ ): 9.21 (d,  $J = 8.0$  Hz, 1H), 8.79 (d,  $J = 8.0$  Hz, 1H), 8.22 (d,  $J = 8.0$  Hz, 1H), 8.15 (d,  $J = 8.0$  Hz, 1H), 8.00 (d,  $J = 8.0$  Hz, 1H), 7.85 (m, 2H), 7.62 (m, 3H), 7.42 (m, 4H);  $^{13}\text{C}$  NMR (100 MHz,  $\text{CDCl}_3$ ): 156.1, 153.4, 147.4, 144.5, 133.5, 131.8, 130.5, 128.4, 127.6, 127.1, 127.0, 125.5, 124.2, 123.4, 123.1, 123.0, 122.8, 120.8, 120.32, 120.26, 114.1, 111.7, 111.0, 108.8; HRMS (ESI): calcd for  $\text{C}_{25}\text{H}_{15}\text{N}_2\text{O}^+$  ( $\text{M}+\text{H}$ ) $^+$  359.1179, found 359.1178.

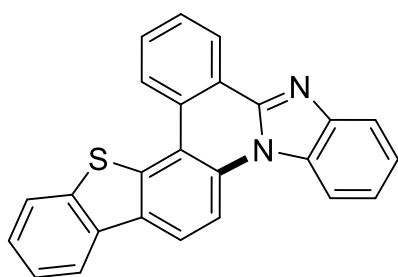

Benzo[4,5]imidazo[1,2-f]benzo[4,5]thieno[2,3-a]phenanthridine (**2q**): Condition A: 122 mg, 65% yield; Condition B: 127 mg, 68% yield; white solid, m.p. 260-262 °C;  $^1\text{H}$  NMR (400 MHz,  $\text{CDCl}_3$ ): 9.01 (t,  $J = 8.0$  Hz, 2H), 8.73 (d,  $J = 8.0$  Hz, 1H), 8.42 (t,  $J = 8.0$  Hz, 2H), 8.24 (m, 1H), 8.09 (d,  $J = 4.0$  Hz, 1H), 7.97 (m, 1H), 7.88 (t,  $J = 8.0$  Hz, 1H), 7.75 (t,  $J = 8.0$  Hz, 1H), 7.53 (m, 4H);  $^{13}\text{C}$  NMR (100 MHz,  $\text{CDCl}_3$ ): 147.2, 144.7, 138.6, 136.4, 134.0, 133.8, 133.0, 131.9, 130.2, 129.0, 128.2, 126.8, 126.1, 125.6, 125.0, 124.3, 123.7, 122.8, 122.0, 121.7, 121.2, 120.4, 117.4, 114.2, 113.3; HRMS (ESI): calcd for  $\text{C}_{25}\text{H}_{15}\text{N}_2\text{S}^+$  ( $\text{M}+\text{H}$ ) $^+$  375.0951, found 375.0950.

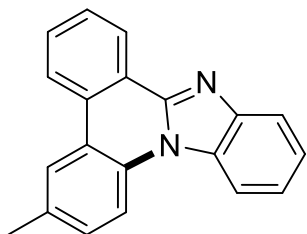

3-Methylbenzo[4,5]imidazo[1,2-f]phenanthridine (**2r**): Condition A: 97 mg, 69% yield; Condition B: 109 mg, 77% yield; white solid, m.p. 213-215 °C;  $^1\text{H}$  NMR (400 MHz,  $\text{CDCl}_3$ ): 8.80 (d,  $J = 4.0$  Hz, 1H), 8.23 (m, 3H), 8.07 (s, 1H), 8.02 (d,  $J = 8.0$  Hz, 1H), 7.62 (m, 2H), 7.49 (t,  $J = 8.0$  Hz, 1H), 7.42 (t,  $J = 8.0$  Hz, 1H), 7.33 (d,  $J = 8.0$  Hz, 1H), 2.44 (s, 3H);  $^{13}\text{C}$  NMR (100 MHz,  $\text{CDCl}_3$ ): 147.3, 144.4, 133.9, 132.2, 131.8, 130.2,

129.9, 129.4, 128.3, 125.9, 124.1, 123.9, 123.4, 122.6, 122.1, 121.4, 120.2, 115.6, 113.8, 21.2; These data are in accordance with the literature.<sup>[3]</sup>

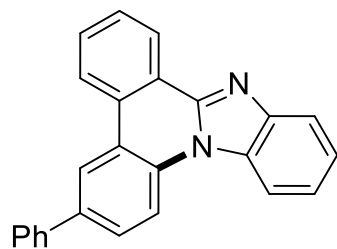

3-Phenylbenzo[4,5]imidazo[1,2-f]phenanthridine (**2s**): Condition A: 133 mg, 77% yield; Condition B: 100 mg, 58% yield; white solid, m.p. 237-239 °C; <sup>1</sup>H NMR (400 MHz, CDCl<sub>3</sub>): 8.91 (d, *J* = 4.0 Hz, 1H), 8.69 (s, 1H), 8.65 (d, *J* = 8.0 Hz, 1H), 8.49 (d, *J* = 8.0 Hz, 1H), 8.39 (d, *J* = 8.0 Hz, 1H), 8.07 (d, *J* = 8.0 Hz, 1H), 7.94 (d, *J* = 8.0 Hz, 1H), 7.74 (m, 4H), 7.50 (m, 5H); <sup>13</sup>C NMR (100 MHz, CDCl<sub>3</sub>): 147.3, 144.5, 139.9, 137.0, 133.4, 131.7, 130.3, 129.3, 129.0, 128.6, 127.7, 127.6, 127.1, 126.0, 124.1, 123.4, 122.9, 122.3, 122.1, 121.8, 120.3, 116.2, 113.8; HRMS (ESI): calcd for C<sub>25</sub>H<sub>17</sub>N<sub>2</sub><sup>+</sup> (M+H)<sup>+</sup> 345.1386, found 345.1386.

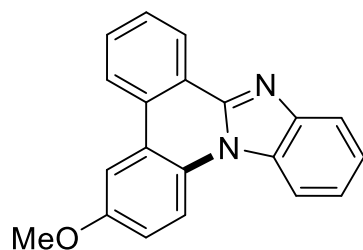

3-Methoxybenzo[4,5]imidazo[1,2-f]phenanthridine (**2t**): Condition A: 104 mg, 70% yield; Condition B: 89 mg, 60% yield; white solid, m.p. 149-150 °C; <sup>1</sup>H NMR (400 MHz, CDCl<sub>3</sub>): 8.75 (m, 1H), 8.20 (d, *J* = 8.0 Hz, 1H), 8.09 (m, 2H), 7.99 (d, *J* = 8.0 Hz, 1H), 7.59 (m, 3H), 7.46 (t, *J* = 8.0 Hz, 1H), 7.38 (d, *J* = 8.0 Hz, 1H), 7.03 (dd, *J* = 8.0 Hz, *J* = 4.0 Hz, 1H), 3.83 (s, 3H); <sup>13</sup>C NMR (100 MHz, CDCl<sub>3</sub>): 156.0, 146.9, 144.3, 131.6, 130.0, 129.1, 128.50, 128.46, 125.9, 123.7, 123.5, 122.8, 122.6, 122.1, 120.2, 116.8, 115.5, 113.5, 107.7, 55.5; These data are in accordance with the literature.<sup>[3]</sup>

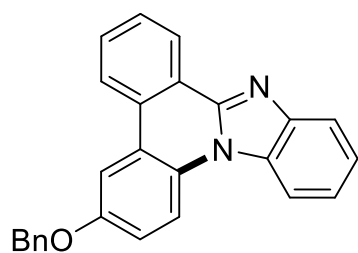

3-(Benzyloxy)benzo[4,5]imidazo[1,2-f]phenanthridine (**2u**): Condition A: 117 mg, 62% yield; Condition B: 87 mg, 46% yield; white solid, m.p. 233-234 °C; <sup>1</sup>H NMR (400 MHz, CDCl<sub>3</sub>): 8.89 (d, *J* = 8.0 Hz, 1H), 8.50 (d, *J* = 8.0 Hz, 1H), 8.30 (m, 2H), 8.04 (m, 2H), 7.71 (m, 2H), 7.44 (m, 8H); <sup>13</sup>C NMR (100 MHz, CDCl<sub>3</sub>): 155.5, 147.2, 144.5, 136.6, 131.8, 130.3, 129.3, 129.0, 128.80, 128.77, 128.3, 127.6, 126.2, 123.9, 123.8, 123.2, 122.8, 122.4, 120.4, 117.2, 116.7, 113.6, 109.6, 70.7; HRMS (ESI): calcd for C<sub>26</sub>H<sub>19</sub>N<sub>2</sub>O<sup>+</sup> (M+H)<sup>+</sup> 375.1492, found 375.1492.

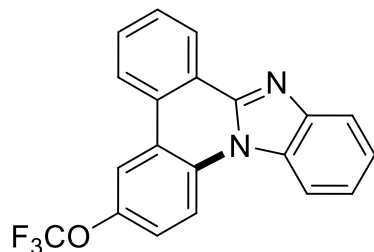

3-(Trifluoromethoxy)benzo[4,5]imidazo[1,2-*f*]phenanthridine (**2v**): Condition A: 127 mg, 72% yield; Condition B: 162 mg, 92% yield; white solid, m.p. 172-174 °C; <sup>1</sup>H NMR (400 MHz, CDCl<sub>3</sub>): 8.85 (d, *J* = 8.0 Hz, 1H), 8.55 (d, *J* = 8.0 Hz, 1H), 8.27 (m, 3H), 8.04 (d, *J* = 8.0 Hz, 1H), 7.74 (m, 2H), 7.52 (m, 3H); <sup>19</sup>F NMR (376 MHz, CDCl<sub>3</sub>): -57.8; <sup>13</sup>C NMR (100 MHz, CDCl<sub>3</sub>): 146.9, 145.3, 144.2, 132.5, 131.4, 130.5, 129.3, 128.1, 125.9, 124.3, 123.4, 123.2, 123.1, 122.2, 121.5, 120.5 (q, *J*<sub>F-C</sub> = 256 Hz), 120.4, 117.0, 116.7, 116.5, 113.3; HRMS (ESI): calcd for C<sub>20</sub>H<sub>12</sub>F<sub>3</sub>N<sub>2</sub>O<sup>+</sup> (M+H)<sup>+</sup> 353.0896, found 353.0896.

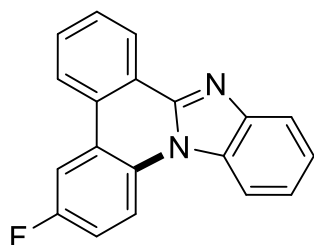

3-Fluorobenzo[4,5]imidazo[1,2-*f*]phenanthridine (**2w**): Condition A: 115 mg, 80% yield; Condition B: 104 mg, 73% yield; white solid, m.p. 196-198 °C; <sup>1</sup>H NMR (400 MHz, CDCl<sub>3</sub>): 8.76 (d, *J* = 4.0 Hz, 1H), 8.34 (m, 1H), 8.12 (d, *J* = 8.0 Hz, 2H), 7.97 (m, 2H), 7.64 (m, 2H), 7.45 (m, 2H), 7.28 (t, *J* = 8.0 Hz, 1H); <sup>19</sup>F NMR (376 MHz, CDCl<sub>3</sub>): -116.7; <sup>13</sup>C NMR (100 MHz, CDCl<sub>3</sub>): 159.1 (d, *J*<sub>F-C</sub> = 243 Hz), 146.9, 144.3, 131.5, 130.7, 130.4, 129.2, 128.5, 126.0, 124.1, 123.53, 123.46, 123.01, 122.3, 120.4, 117.3 (d, *J*<sub>F-C</sub> = 8 Hz), 116.2 (d, *J*<sub>F-C</sub> = 24 Hz), 113.4, 110.2 (d, *J*<sub>F-C</sub> = 24 Hz); HRMS (ESI): calcd for C<sub>19</sub>H<sub>12</sub>FN<sub>2</sub><sup>+</sup> (M+H)<sup>+</sup> 287.0979, found 287.0979.

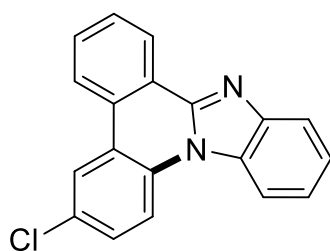

3-Chlorobenzo[4,5]imidazo[1,2-*f*]phenanthridine (**2x**): Condition A: 116 mg, 77% yield; Condition B: 110 mg, 73% yield; white solid, m.p. 205-207 °C; <sup>1</sup>H NMR (400 MHz, CDCl<sub>3</sub>): 8.72 (d, *J* = 8.0 Hz, 1H), 8.25 (d, *J* = 8.0 Hz, 1H), 8.20 (s, 1H), 8.10 (t, *J* = 8.0 Hz, 2H), 7.98 (d, *J* = 8.0 Hz, 1H), 7.63 (m, 2H), 7.48 (t, *J* = 8.0 Hz, 2H), 7.41 (t, *J* = 8.0 Hz, 1H); <sup>13</sup>C NMR (100 MHz, CDCl<sub>3</sub>): 146.9, 144.4, 132.6, 131.5, 130.4, 129.9, 129.2, 128.8, 128.1, 126.0, 124.3, 123.8, 123.5, 123.1, 123.1, 122.2, 120.5, 117.0, 113.5; HRMS (ESI): calcd for C<sub>19</sub>H<sub>12</sub>ClN<sub>2</sub><sup>+</sup> (M+H)<sup>+</sup> 303.0684, found 303.0681.

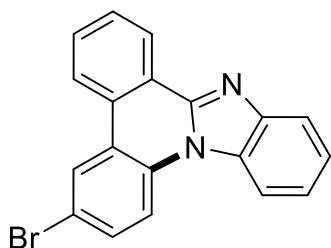

3-Bromobenzo[4,5]imidazo[1,2-*f*]phenanthridine (**2y**): Condition A: 125 mg, 72% yield; Condition B: 107 mg, 62% yield; white solid, m.p. 219-220°C; <sup>1</sup>H NMR (400 MHz, CDCl<sub>3</sub>): 8.85 (d, *J* = 4.0 Hz, 1H), 8.68 (s, 1H), 8.29 (m, 3H), 8.05 (d, *J* = 4.0 Hz, 1H), 7.72 (m, 2H), 7.61 (d, *J* = 8.0 Hz, 1H), 7.53 (m, 2H); <sup>13</sup>C NMR (100 MHz, CDCl<sub>3</sub>): 146.9, 144.3, 134.6, 131.2, 130.3, 128.7, 128.3, 127.1, 125.8, 125.0, 124.3, 123.1, 122.9, 122.7, 121.8, 120.4, 120.2, 118.54, 113.46; HRMS (ESI): calcd for C<sub>19</sub>H<sub>12</sub>BrN<sub>2</sub><sup>+</sup> (M+H)<sup>+</sup> 347.0178, found 347.0180.

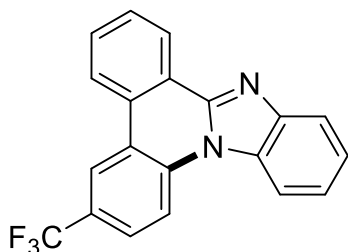

3-(Trifluoromethyl)benzo[4,5]imidazo[1,2-*f*]phenanthridine (**2z**): Condition A: 110 mg, 65% yield; Condition B: 79 mg, 47% yield; white solid, m.p. 211-213 °C; <sup>1</sup>H NMR (400 MHz, CDCl<sub>3</sub>): 8.69 (d, *J* = 8.0 Hz, 1H), 8.53 (s, 1H), 8.42 (d, *J* = 8.0 Hz, 1H), 8.21 (d, *J* = 8.0 Hz, 1H), 8.13 (d, *J* = 8.0 Hz, 1H), 7.96 (d, *J* = 8.0 Hz, 1H), 7.79 (d, *J* = 8.0 Hz, 1H), 7.65 (m, 2H), 7.47 (m, 2H); <sup>19</sup>F NMR (376 MHz, CDCl<sub>3</sub>): -61.9; <sup>13</sup>C NMR (100 MHz, CDCl<sub>3</sub>): 147.1, 144.4, 136.1, 131.5, 130.6, 129.4, 128.2, 126.23 (q, *J*<sub>F-C</sub> = 33 Hz), 126.0, 125.4 (q, *J*<sub>F-C</sub> = 3 Hz), 125.6, 123.9 (q, *J*<sub>F-C</sub> = 271 Hz), 123.5, 123.4, 122.2, 121.7, 121.3 (q, *J*<sub>F-C</sub> = 4 Hz), 120.6, 116.1, 113.6; HRMS (ESI): calcd for C<sub>20</sub>H<sub>12</sub>F<sub>3</sub>N<sub>2</sub><sup>+</sup> (M+H)<sup>+</sup> 337.0947, found 337.0945.

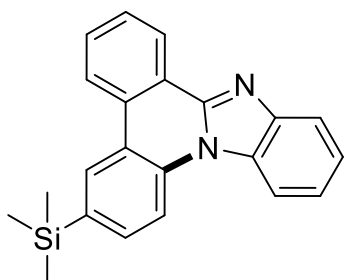

3-(Trimethylsilyl)benzo[4,5]imidazo[1,2-*f*]phenanthridine (**2aa**): Condition A: 109 mg, 64% yield; Condition B: 136 mg, 80% yield; white solid, m.p. 198-200 °C; <sup>1</sup>H NMR (400 MHz, CDCl<sub>3</sub>): 8.82 (d, *J* = 8.0 Hz, 1H), 8.57 (s, 1H), 8.46 (d, *J* = 8.0 Hz, 1H), 8.38 (d, *J* = 8.0 Hz, 1H), 8.28 (d, *J* = 8.0 Hz, 1H), 8.02 (d, *J* = 8.0 Hz, 1H), 8.79 (d, *J* = 8.0 Hz, 1H), 7.71 (t, *J* = 6.0 Hz, 1H), 7.64 (t, *J* = 6.0 Hz, 1H), 7.47 (m, 2H), 0.42 (s, 9H); <sup>13</sup>C NMR (100 MHz, CDCl<sub>3</sub>): 147.4, 144.5, 136.1, 134.7, 134.0, 131.8, 130.3, 129.5, 129.0, 128.4, 126.0, 124.0, 123.4, 122.8, 122.0, 120.7, 120.3, 115.2, 113.9, -1.0; HRMS (ESI): calcd for C<sub>22</sub>H<sub>21</sub>N<sub>2</sub>Si<sup>+</sup> (M+H)<sup>+</sup> 341.1469, found 341.1470.

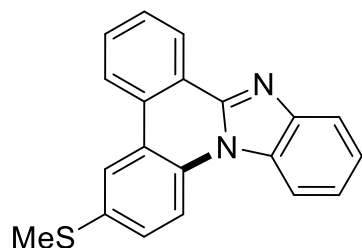

3-(Methylthio)benzo[4,5]imidazo[1,2-*f*]phenanthridine (**2ab**): Condition A: 28 mg, 18% yield; Condition B: trace; white solid, m.p. 156-158 °C; <sup>1</sup>H NMR (400 MHz, CDCl<sub>3</sub>): 8.84 (d, *J* = 4.0 Hz, 1H), 8.43 (d, *J* = 8.0 Hz, 1H), 8.28 (m, 3H), 8.04 (d, *J* = 8.0 Hz, 1H), 7.69 (m, 2H), 7.5 (m, 3H), 2.63 (s, 3H); <sup>13</sup>C NMR (100 MHz, CDCl<sub>3</sub>): 147.2, 144.3, 134.5, 132.1, 131.7, 130.5, 128.9, 128.8, 127.9, 126.1, 124.2, 123.5, 123.0, 122.4, 122.3, 122.2, 120.4, 116.5, 113.8, 16.6; HRMS (ESI): calcd for C<sub>20</sub>H<sub>15</sub>N<sub>2</sub>S<sup>+</sup> (M+H)<sup>+</sup> 315.0951, found 315.0949.

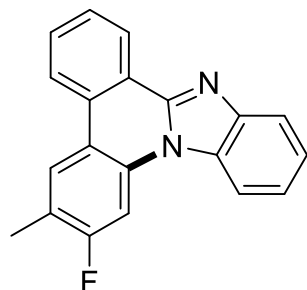

2-Fluoro-3-methylbenzo[4,5]imidazo[1,2-*f*]phenanthridine (**2ac**): Condition A: 119 mg, 80% yield; Condition B: 105 mg, 70% yield; white solid, m.p. 228-230 °C; <sup>1</sup>H NMR (400 MHz, CDCl<sub>3</sub>): 8.54 (d, *J* = 8.0 Hz, 1H), 8.26 (m, 3H), 8.17 (d, *J* = 12.0 Hz, 1H), 8.05 (d, *J* = 4.0 Hz, 1H), 7.68 (m, 2H), 7.51 (m, 2H); <sup>19</sup>F NMR (376 MHz, CDCl<sub>3</sub>): -113.0; <sup>13</sup>C NMR (100 MHz, CDCl<sub>3</sub>): 161.4 (d, *J*<sub>F-C</sub> = 246 Hz), 147.5, 144.5, 133.2, 131.6, 130.5, 129.0, 128.3, 126.9 (d, *J*<sub>F-C</sub> = 7 Hz), 126.1, 124.3, 123.0, 122.9, 122.1, 121.5, 120.5, 117.9 (d, *J*<sub>F-C</sub> = 2 Hz), 113.5, 102.9 (d, *J*<sub>F-C</sub> = 28 Hz), 14.7 (d, *J*<sub>F-C</sub> = 3 Hz); HRMS (ESI): calcd for C<sub>20</sub>H<sub>14</sub>FN<sub>2</sub><sup>+</sup> (M+H)<sup>+</sup> 301.1136, found 301.1143.

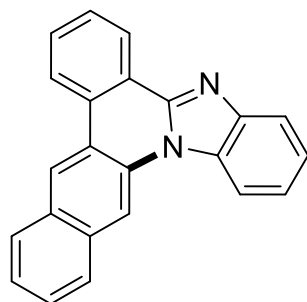

Benzo[*b*]benzo[4,5]imidazo[1,2-*f*]phenanthridine (**2ad**): Condition A: 120 mg, 75% yield; Condition B: 126 mg, 79% yield; white solid, m.p. 214-216 °C; <sup>1</sup>H NMR (400 MHz, CDCl<sub>3</sub>): 8.87 (d, *J* = 8.0 Hz, 1H), 8.51 (d, *J* = 8.0 Hz, 1H), 8.33 (m, 2H), 8.04 (d, *J* = 8.0 Hz, 1H), 7.95 (d, *J* = 8.0 Hz, 1H), 7.88 (d, *J* = 8.0 Hz, 1H), 7.76 (d, *J* = 8.0 Hz, 1H), 7.68 (m, 2H), 7.60 (t, *J* = 8.0 Hz, 1H), 7.48 (q, *J* = 8.0 Hz, 2H), 7.25 (m, 1H); <sup>13</sup>C NMR (100 MHz, CDCl<sub>3</sub>): 148.8, 144.5, 133.7, 133.4, 130.4, 129.7, 129.4, 128.6, 128.0, 127.2, 125.9, 125.7, 124.8, 124.6, 124.1, 123.8, 123.3, 122.58, 120.62, 120.5, 120.3, 120.1, 115.6; HRMS (ESI): calcd for

$C_{23}H_{15}N_2^+$  (M+H)<sup>+</sup> 319.1230, found 319.1229.

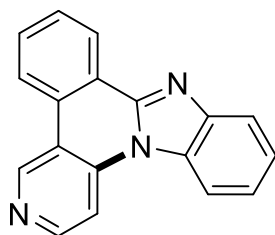

Benzo[c]benzo[4,5]imidazo[1,2-*a*][1,6]naphthyridine (**2ae**): Condition A: 79 mg, 59% yield; Condition B: 33 mg, 25% yield; white solid, m.p. 188-190 °C; <sup>1</sup>H NMR (400 MHz, CDCl<sub>3</sub>): 9.00 (d, *J* = 8.0 Hz, 1H), 8.69 (m, 1H), 8.57 (d, *J* = 4.0 Hz, 1H), 8.41 (d, *J* = 8.0 Hz, 1H), 8.06 (m, 1H), 7.96 (d, *J* = 8.0 Hz, 1H), 7.58 (m, 2H), 7.47 (m, 2H), 7.24 (m, 1H); <sup>13</sup>C NMR (100 MHz, CDCl<sub>3</sub>): 148.14, 148.10, 147.2, 145.8, 143.9, 131.5, 130.2, 129.0, 128.3, 125.8, 124.5, 123.3, 122.2, 119.8, 119.3, 117.1, 116.33, 116.27; HRMS (ESI): calcd for C<sub>18</sub>H<sub>12</sub>N<sub>3</sub><sup>+</sup> (M+H)<sup>+</sup> 270.1026, found 270.1026.

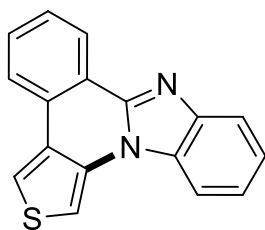

Benzo[4,5]imidazo[2,1-*a*]thieno[3,4-*c*]isoquinoline (**2af**): Condition A: 115 mg, 84% yield; Condition B: 101 mg, 74% yield; white solid, m.p. 195-197 °C; <sup>1</sup>H NMR (400 MHz, CDCl<sub>3</sub>): 8.77 (d, *J* = 8.0 Hz, 1H), 7.96 (m, 3H), 7.52 (m, 5H), 7.15 (d, *J* = 4.0 Hz, 1H); <sup>13</sup>C NMR (100 MHz, CDCl<sub>3</sub>): 147.0, 143.4, 134.5, 130.2, 129.8, 128.6, 127.1, 125.7, 124.4, 122.9, 122.8, 122.3, 121.1, 119.8, 117.7, 111.6; HRMS (ESI): calcd for C<sub>17</sub>H<sub>11</sub>N<sub>2</sub>S<sup>+</sup> (M+H)<sup>+</sup> 275.0638, found 275.0639.

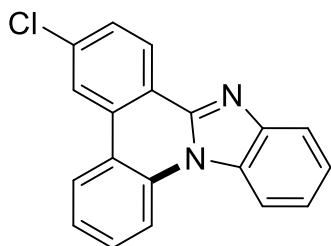

6-Chlorobenzo[4,5]imidazo[1,2-*f*]phenanthridine (**2ag**): Condition A: 122 mg, 81% yield; Condition B: trace; white solid, m.p. 210-212 °C; <sup>1</sup>H NMR (400 MHz, CDCl<sub>3</sub>): 8.61 (d, *J* = 8.0 Hz, 1H), 8.30 (d, *J* = 8.0 Hz, 1H), 8.14 (t, *J* = 6.0 Hz, 2H), 8.09 (s, 1H), 7.95 (d, *J* = 8.0 Hz, 1H), 7.55 (t, *J* = 8.0 Hz, 1H), 7.48 (m, 2H), 7.39 (t, *J* = 8.0 Hz, 1H), 7.33 (t, *J* = 8.0 Hz, 1H); <sup>13</sup>C NMR (100 MHz, CDCl<sub>3</sub>): 146.5, 144.3, 136.7, 134.4, 131.6, 130.6, 129.6, 128.8, 127.4, 124.4, 124.2, 124.0, 123.1, 122.0, 121.5, 120.3, 120.3, 115.8, 113.8; These data are in accordance with the literature.<sup>[4]</sup>

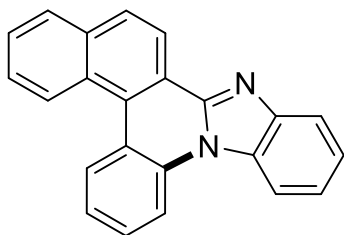

Benzo[*k*]benzo[4,5]imidazo[1,2-*f*]phenanthridine (**2ah**): Condition A: 107 mg, 67% yield; Condition B: 103 mg, 65% yield; white solid, m.p. 155-157 °C; <sup>1</sup>H NMR (400 MHz, CDCl<sub>3</sub>): 8.76 (d, *J* = 8.0 Hz, 2H), 8.70 (d, *J* = 8.0 Hz, 1H), 8.50 (d, *J* = 12.0 Hz, 1H), 8.26 (d, *J* = 8.0 Hz, 1H), 8.04 (d, *J* = 8.0 Hz, 1H), 7.96 (m, 2H), 7.60 (m, 3H), 7.50 (t, *J* = 8.0 Hz, 1H), 7.43 (q, *J* = 8.0 Hz, 2H); <sup>13</sup>C NMR (100 MHz, CDCl<sub>3</sub>): 148.0, 145.1, 135.2, 134.3, 131.3, 129.8, 129.4, 129.0, 128.7, 127.4, 127.2, 126.88, 126.85, 124.2, 123.8, 122.8, 122.3, 122.1, 121.9, 120.4, 115.8, 113.9; These data are in accordance with the literature.<sup>[4]</sup>

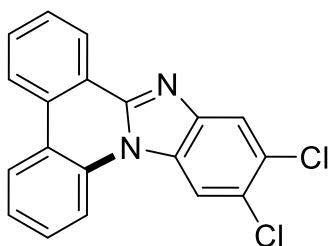

11,12-Dichlorobenzo[4,5]imidazo[1,2-*f*]phenanthridine (**2ai**): Condition A: 101 mg, 60% yield; Condition B: 116 mg, 69% yield; white solid, m.p. 242-244 °C; <sup>1</sup>H NMR (400 MHz, CDCl<sub>3</sub>): 8.71 (d, *J* = 8.0 Hz, 1H), 8.42 (d, *J* = 8.0 Hz, 1H), 8.32 (m, 2H), 8.23 (d, *J* = 8.0 Hz, 1H), 7.99 (s, 1H), 7.74 (t, *J* = 8.0 Hz, 1H), 7.67 (m, 2H), 7.51 (t, *J* = 8.0 Hz, 1H); <sup>13</sup>C NMR (100 MHz, CDCl<sub>3</sub>): 149.0, 143.9, 133.6, 131.0, 130.7, 129.6, 129.4, 128.8, 128.1, 126.4, 126.2, 125.0, 124.4, 122.8, 122.3, 121.7, 121.0, 115.6, 115.0; These data are in accordance with the literature.<sup>[1]</sup>

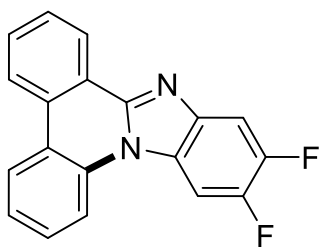

11,12-Difluorobenzo[4,5]imidazo[1,2-*f*]phenanthridine (**2aj**): Condition A: 58 mg, 38% yield; Condition B: 131 mg, 86% yield; white solid, m.p. 216-218 °C; <sup>1</sup>H NMR (400 MHz, CDCl<sub>3</sub>): 8.72 (d, *J* = 8.0 Hz, 1H), 8.40 (d, *J* = 8.0 Hz, 1H), 8.30 (d, *J* = 8.0 Hz, 1H), 8.20 (d, *J* = 8.0 Hz, 1H), 8.03 (dd, *J* = 12.0 Hz, *J* = 8.0 Hz, 1H), 7.72 (t, *J* = 10.0 Hz, 2H), 7.65 (m, 2H), 7.48 (t, *J* = 8.0 Hz, 1H); <sup>19</sup>F NMR (376 MHz, CDCl<sub>3</sub>): -140.1 (d, *J* = 18.8 Hz), -140.6 (d, *J* = 18.8 Hz); <sup>13</sup>C NMR (100 MHz, CDCl<sub>3</sub>): 148.7 (d, *J*<sub>F-C</sub> = 3 Hz), 148.5 (dd, *J*<sub>F-C</sub> = 242 Hz, *J*<sub>F-C</sub> = 13 Hz), 147.5 (dd, *J*<sub>F-C</sub> = 232 Hz, *J*<sub>F-C</sub> = 13 Hz), 140.0 (d, *J*<sub>F-C</sub> = 10 Hz), 133.5, 130.7, 129.2, 128.8, 126.5 (d, *J*<sub>F-C</sub> = 10 Hz), 125.9, 124.9, 124.3, 122.8, 122.2, 121.6, 155.2, 107.1 (d, *J*<sub>F-C</sub> = 19 Hz), 102.2 (d, *J*<sub>F-C</sub> = 24 Hz); HRMS (ESI): calcd for C<sub>19</sub>H<sub>11</sub>F<sub>2</sub>N<sub>2</sub><sup>+</sup> (M+H)<sup>+</sup> 305.0885, found 305.0886.

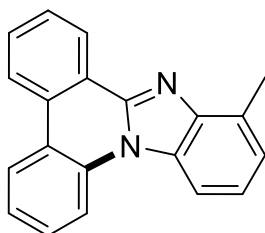

10-Methylbenzo[4,5]imidazo[1,2-f]phenanthridine (**2ak**): Condition A: 37 mg, 26% yield; Condition B: 43 mg, 31% yield; white solid, m.p. 193-195 °C;  $^1\text{H}$  NMR (400 MHz,  $\text{CDCl}_3$ ): 8.89 (d,  $J = 8.0$  Hz, 1H), 8.49 (d,  $J = 8.0$  Hz, 1H), 8.40 (d,  $J = 8.0$  Hz, 1H), 8.30 (d,  $J = 8.0$  Hz, 1H), 8.11 (d,  $J = 8.0$  Hz, 1H), 7.65 (m, 3H), 7.44 (t,  $J = 6.0$  Hz, 1H), 7.31 (m, 2H), 2.86 (s, 3H);  $^{13}\text{C}$  NMR (100 MHz,  $\text{CDCl}_3$ ): 146.7, 143.8, 134.5, 131.5, 130.4, 130.1, 129.3, 129.0, 128.4, 126.1, 124.3, 124.2, 124.1, 123.7, 122.7, 122.1, 121.7, 115.9, 111.3, 17.1; These data are in accordance with the literature.<sup>[4]</sup>

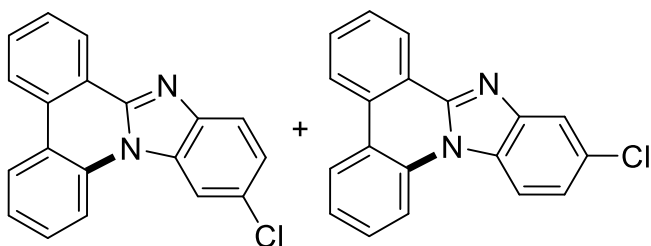

Mixture of 12-chlorobenzo[4,5]imidazo[1,2-f]phenanthridine and 11-chlorobenzo[4,5]imidazo[1,2-f]phenanthridine (**2al**) (ratio: 1/1): Condition A: 101 mg, 67% yield; Condition B: 147 mg, 97% yield; white solid, m.p. 165-167 °C;  $^1\text{H}$  NMR (400 MHz,  $\text{CDCl}_3$ ): 8.65 (d,  $J = 8.0$  Hz, 1H), 8.12 (m, 4H), 7.84 (m, 1H), 7.58 (m, 3H), 7.34 (m, 2H);  $^{13}\text{C}$  NMR (100 MHz,  $\text{CDCl}_3$ ): 148.3, 147.9, 145.3, 142.9, 133.7, 131.9, 130.8, 130.6, 130.5, 130.2, 129.5, 129.3, 129.2, 129.0, 128.5, 128.2, 125.9, 125.9, 124.6, 124.5, 124.5, 124.0, 122.9, 122.8, 122.10, 122.07, 121.5, 121.4, 120.7, 119.8, 115.5, 114.3, 113.8; HRMS (ESI): calcd for  $\text{C}_{19}\text{H}_{12}\text{ClN}_2^+$  ( $\text{M}+\text{H}$ ) $^+$  303.0684, found 303.0682.

## 6. References

- [1] S. K. Bera, M. T. Alam and P. Mal, *J. Org. Chem.*, 2019, **84**, 12009-12020.
- [2] L. Yan, D. Zhao, J. Lan, Y. Cheng, Q. Guo, X. Li, N. Wu and J. You, *Org. Biomol. Chem.*, 2013, **11**, 7966-7977.
- [3] G. Zhao, C. Chen, Y. Yue, Y. Yu and J. Peng, *J. Org. Chem.*, 2015, **80**, 2827-2834.
- [4] C. Chen, G. Shang, J. Zhou, Y. Yu, B. Li and J. Peng, *Org. Lett.*, 2014, **16**, 1872-1875.



## Part II NMR Spectra

### 2a <sup>1</sup>H NMR

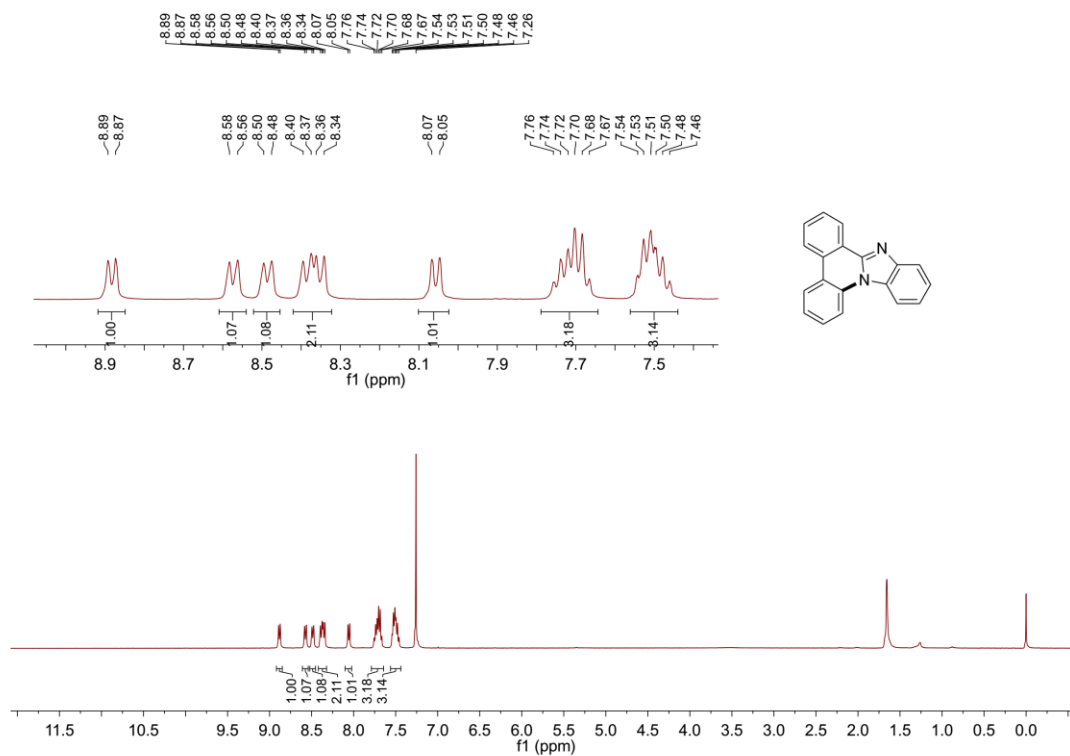

### 2a <sup>13</sup>C NMR

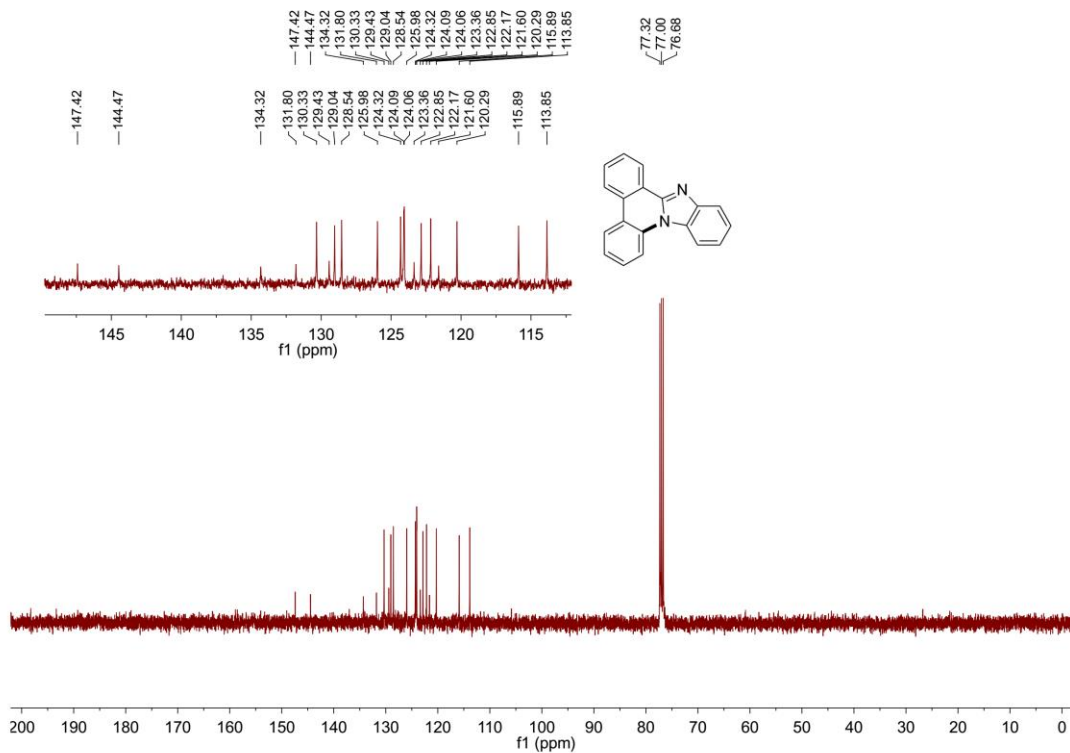

**2b <sup>1</sup>H NMR**

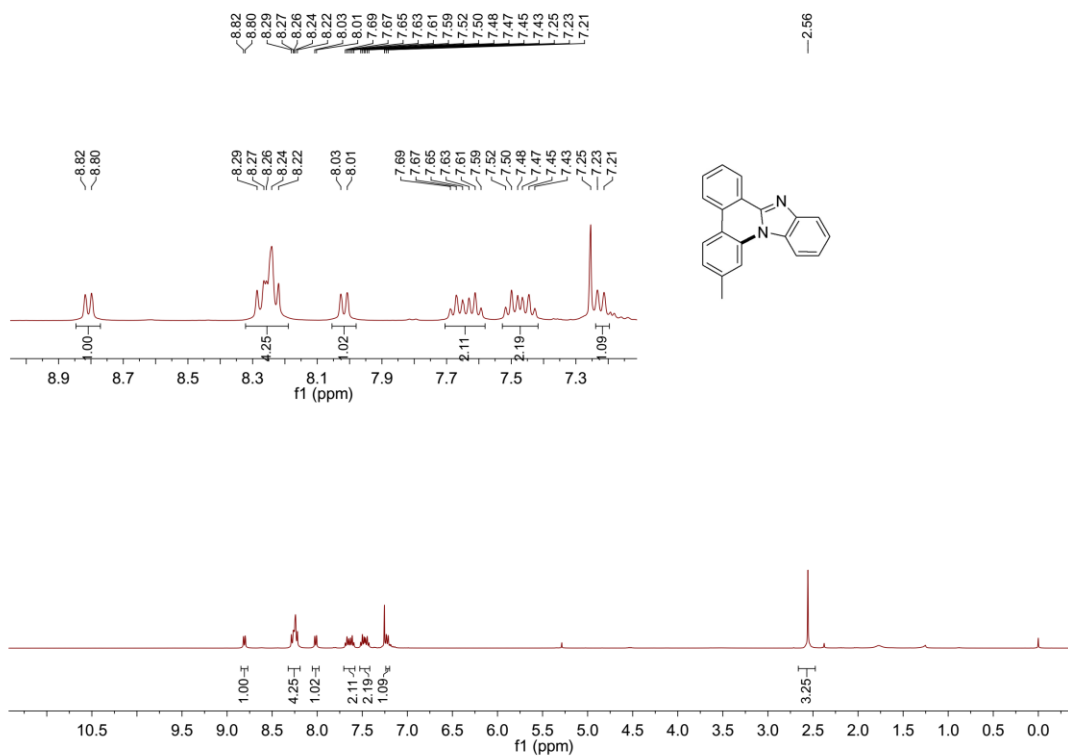

**2b <sup>13</sup>C NMR**

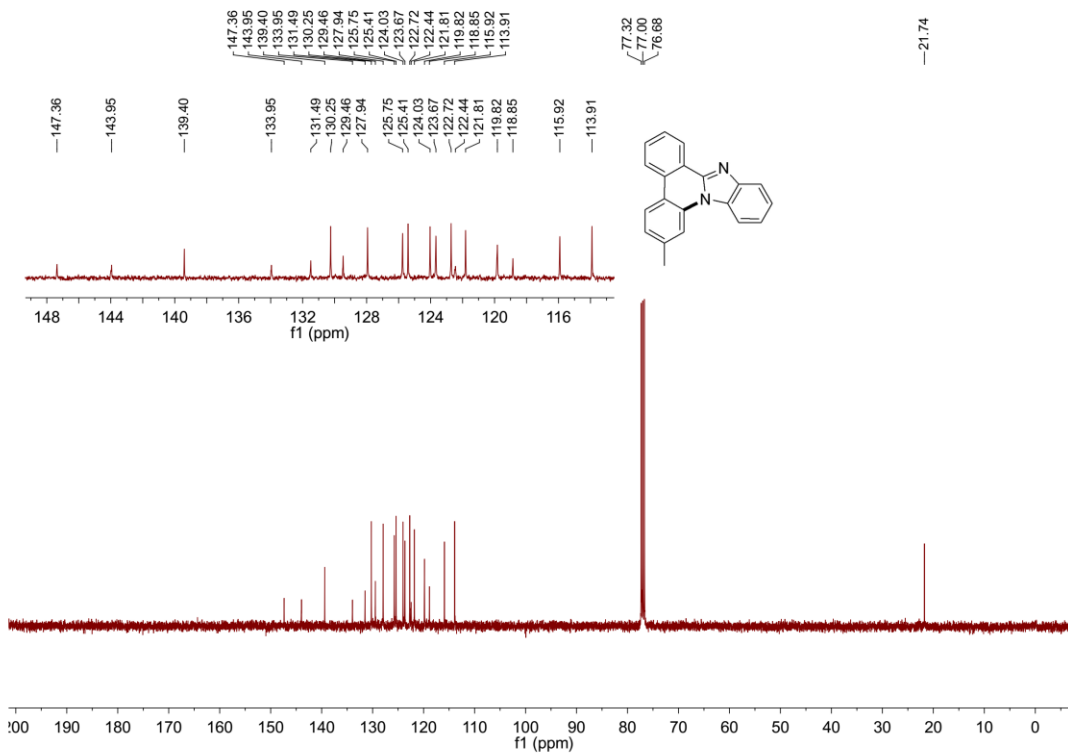

## 2c <sup>1</sup>H NMR

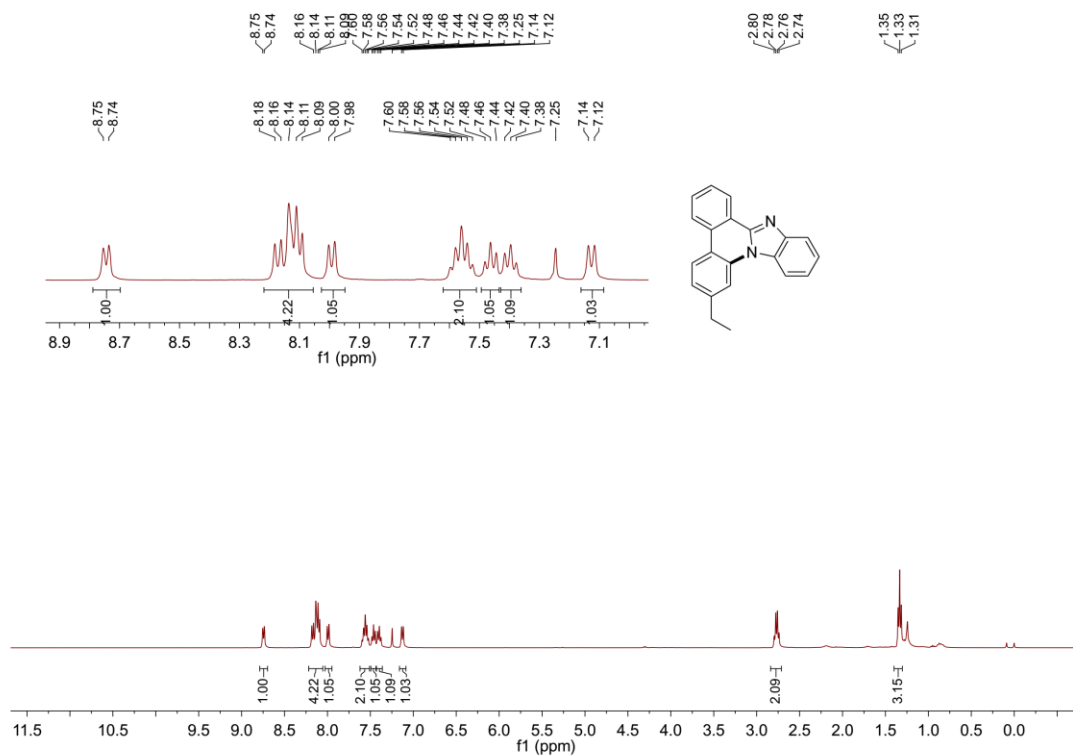

## 2c <sup>13</sup>C NMR

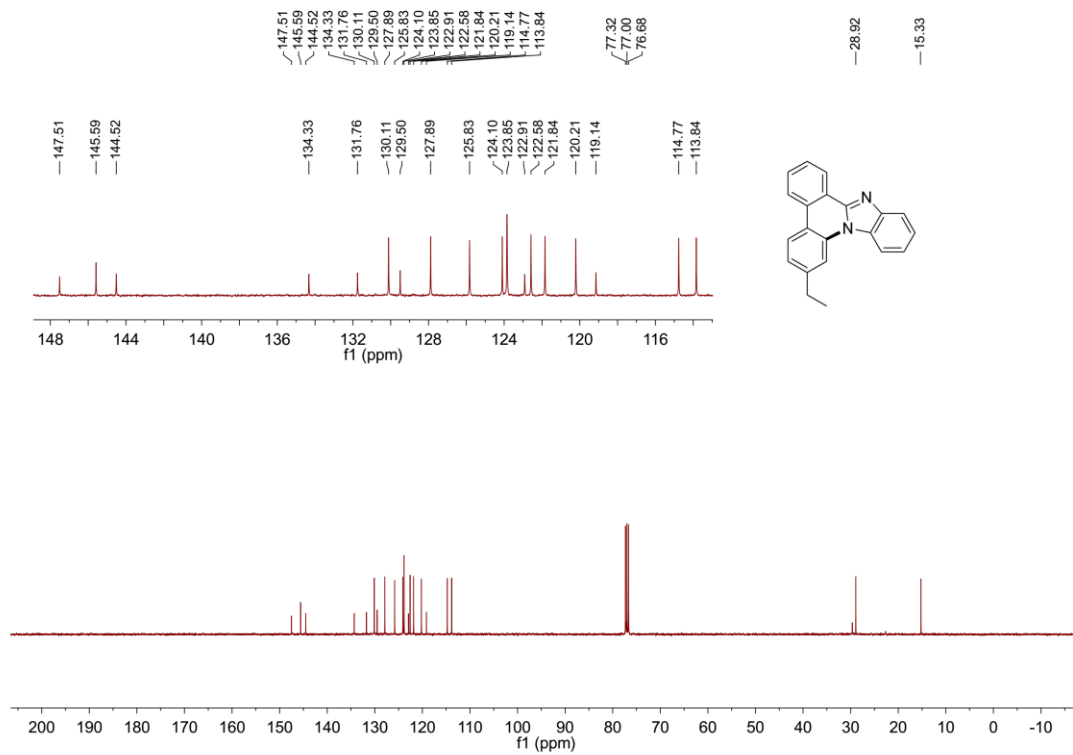

## 2d <sup>1</sup>H NMR

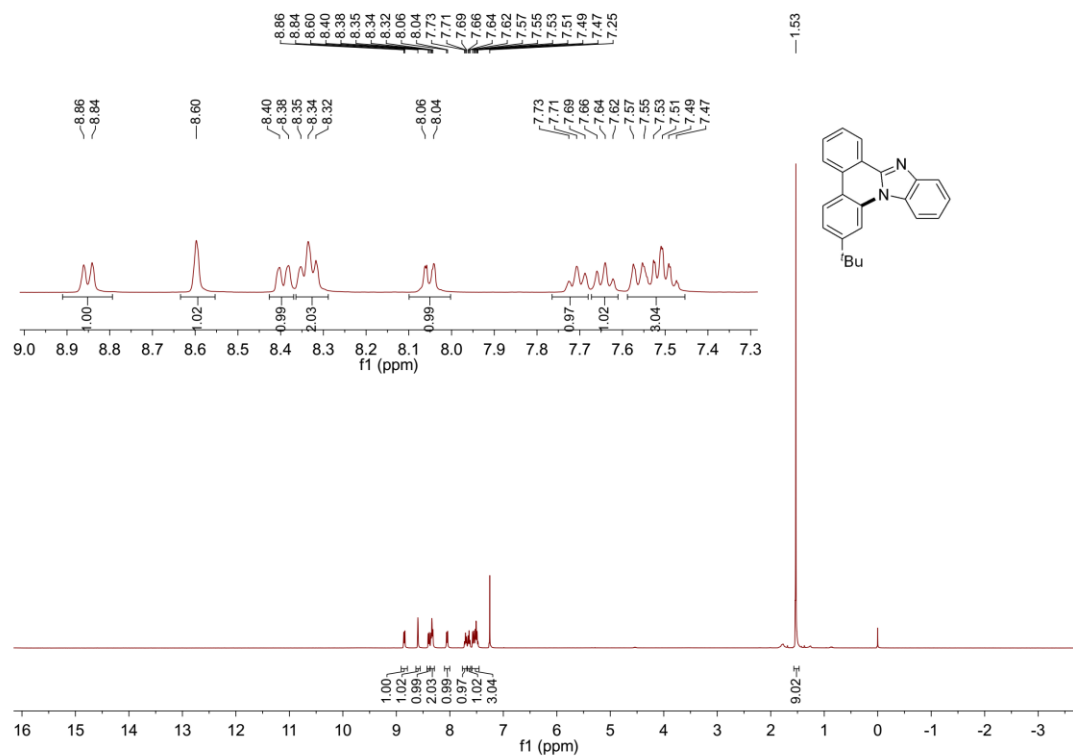

## 2d <sup>13</sup>C NMR

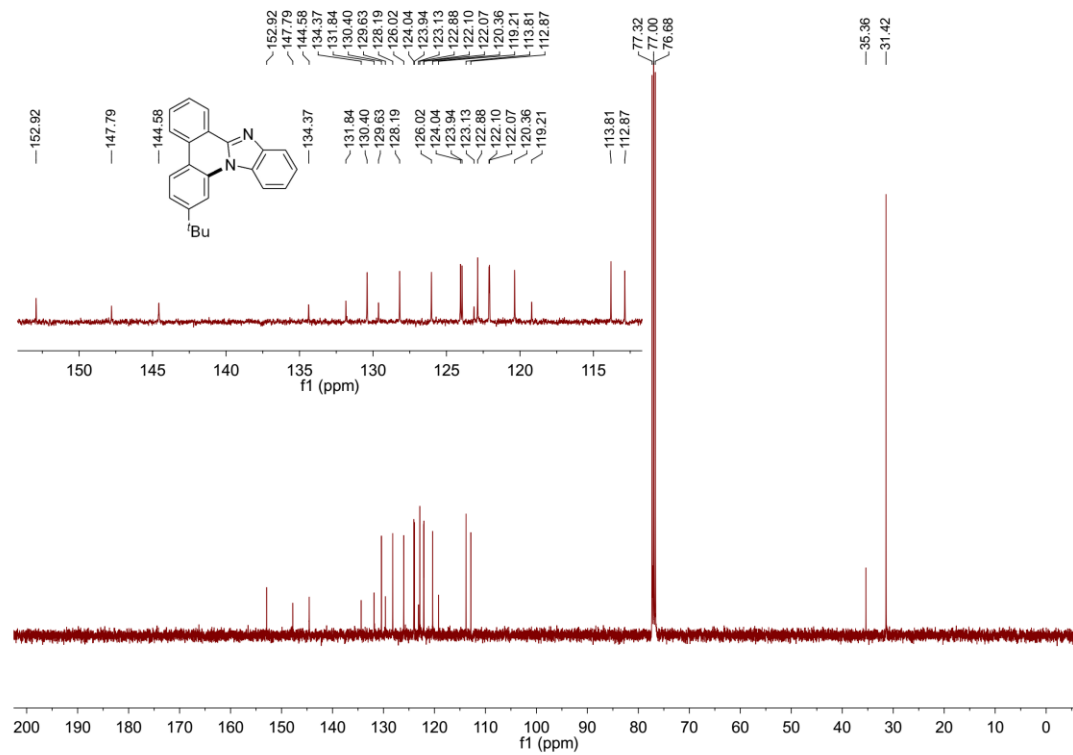

## 2e <sup>1</sup>H NMR

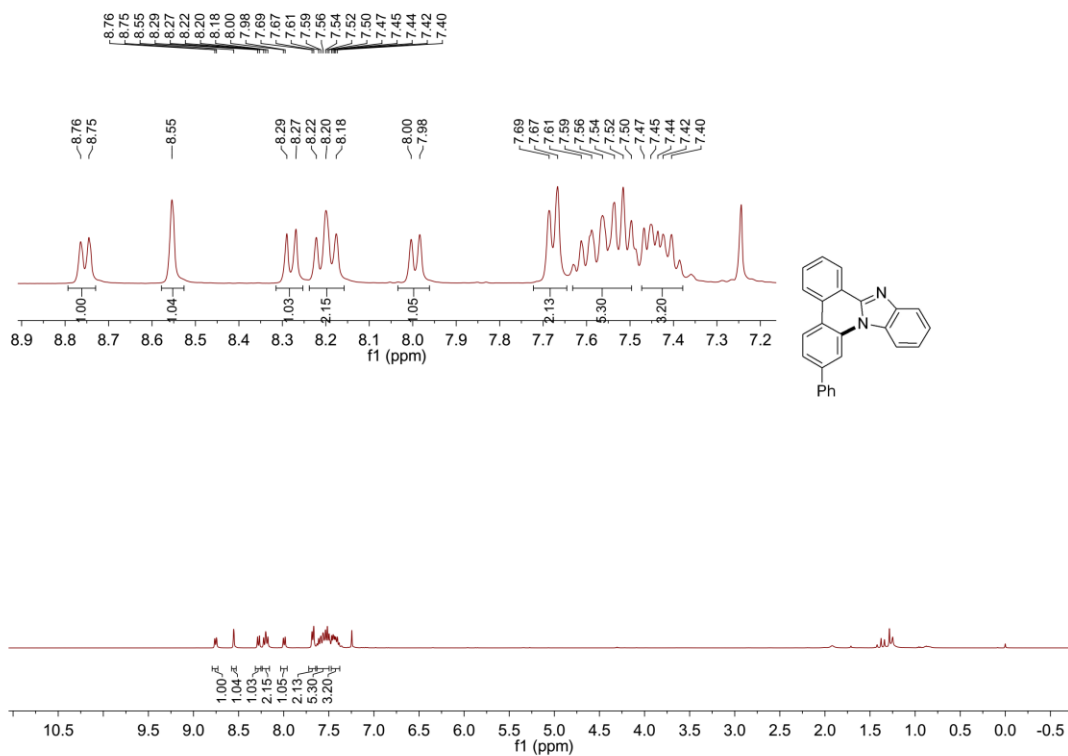

## 2e <sup>13</sup>C NMR

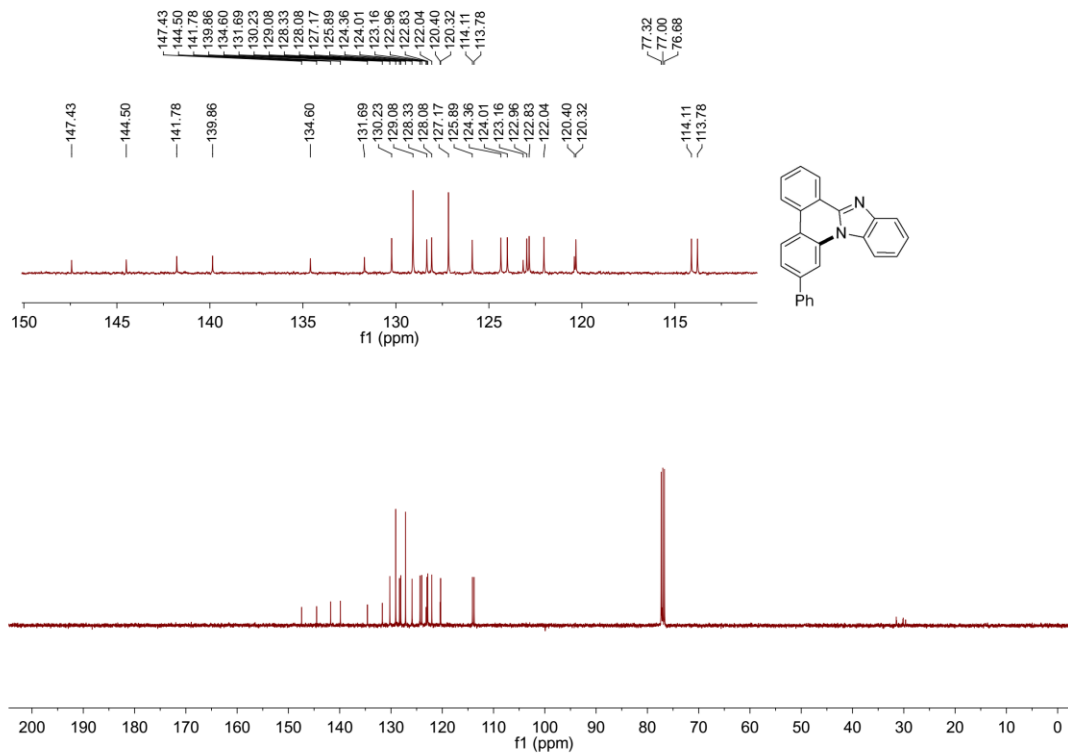

## 2f <sup>1</sup>H NMR

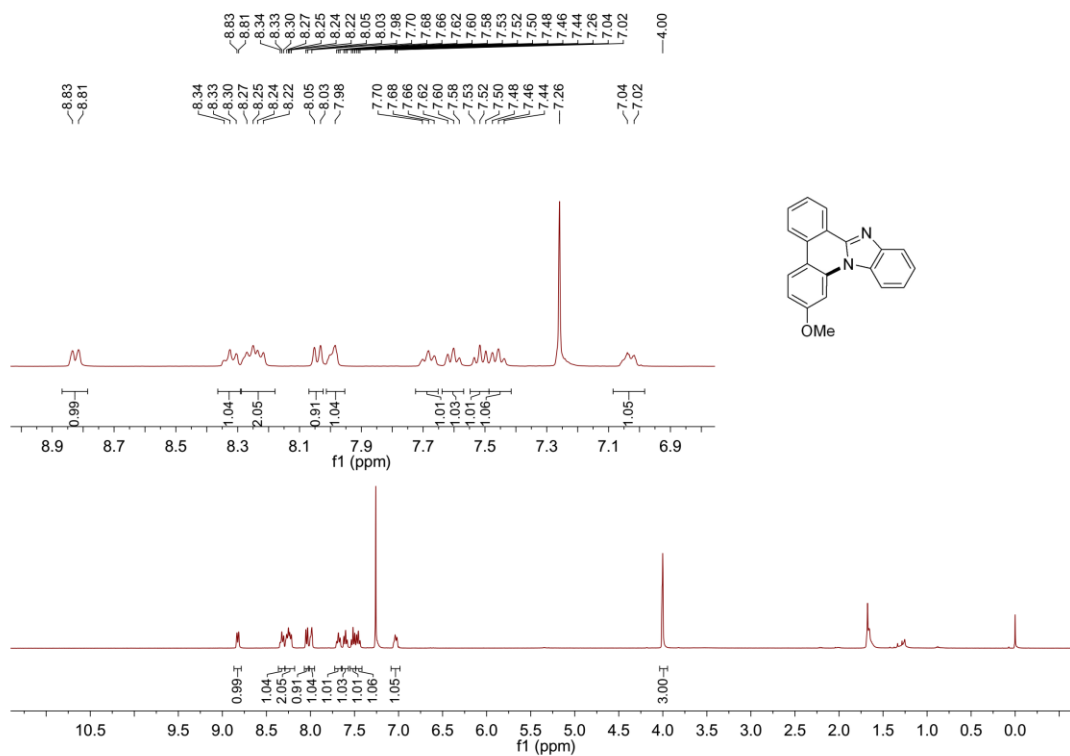

## 2f <sup>13</sup>C NMR

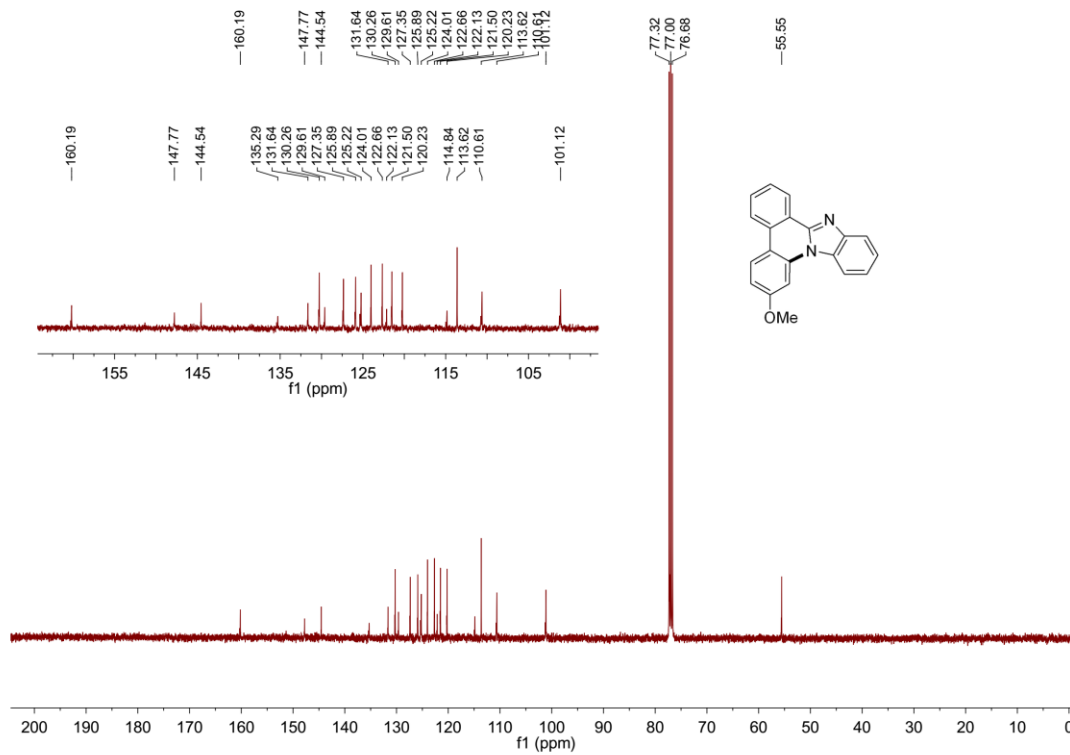

## 2g <sup>1</sup>H NMR

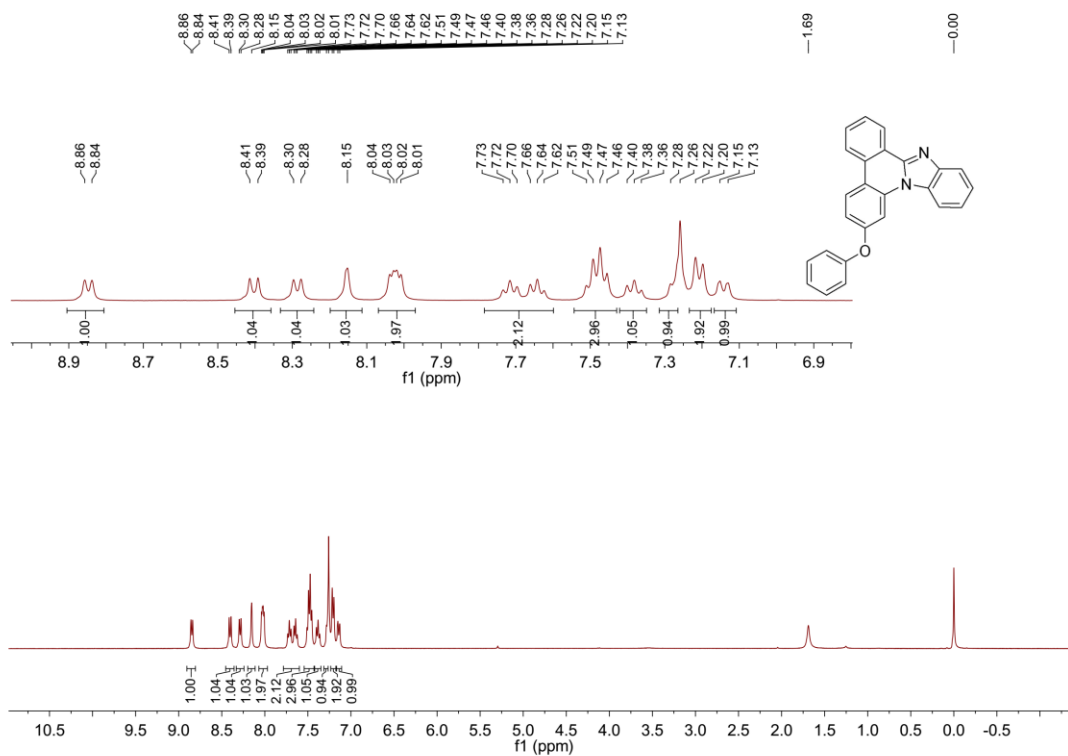

## 2g <sup>13</sup>C NMR

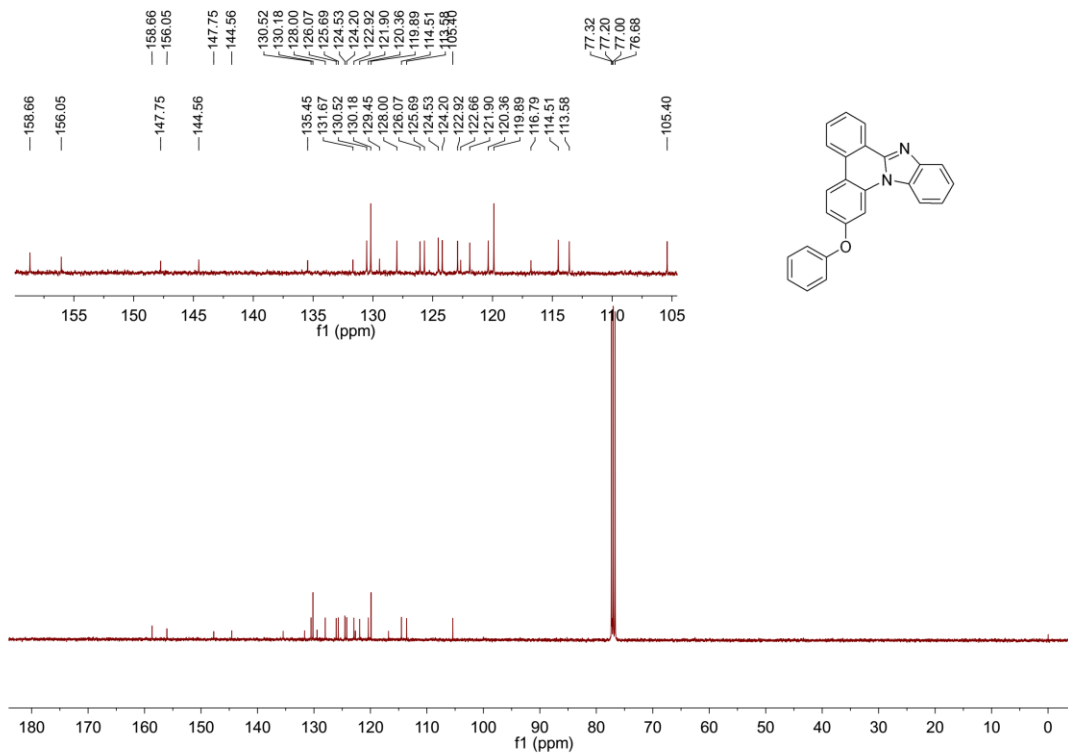

## 2h <sup>1</sup>H NMR

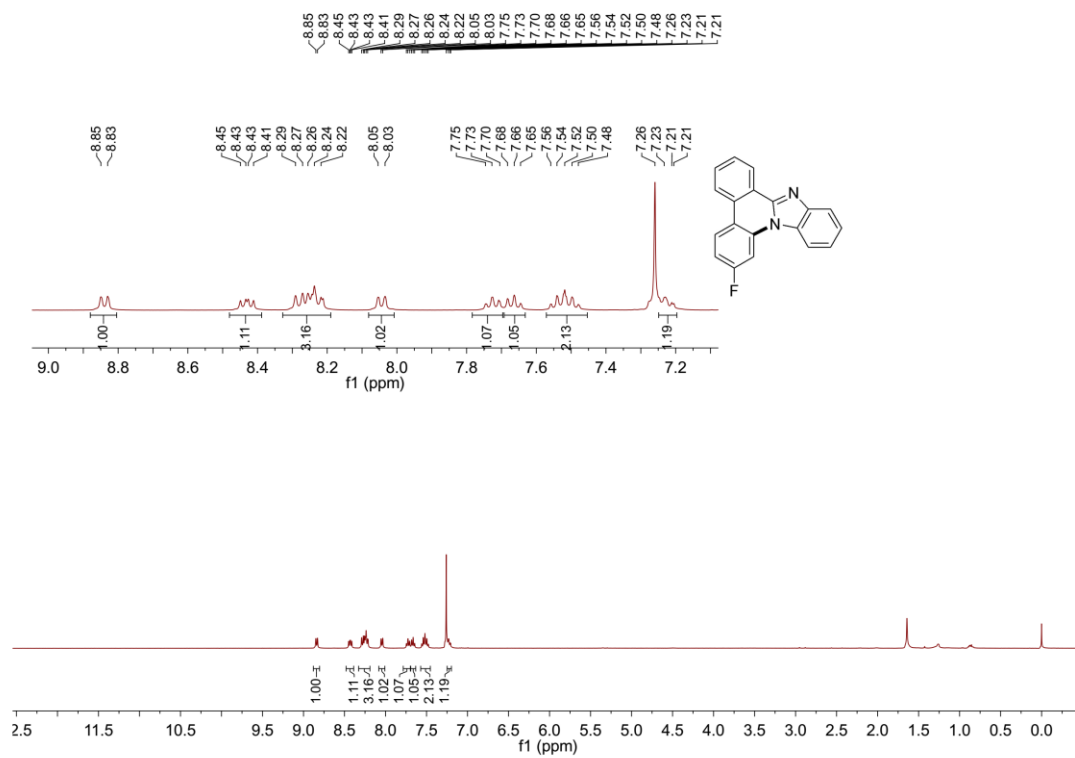

## 2h <sup>19</sup>F NMR

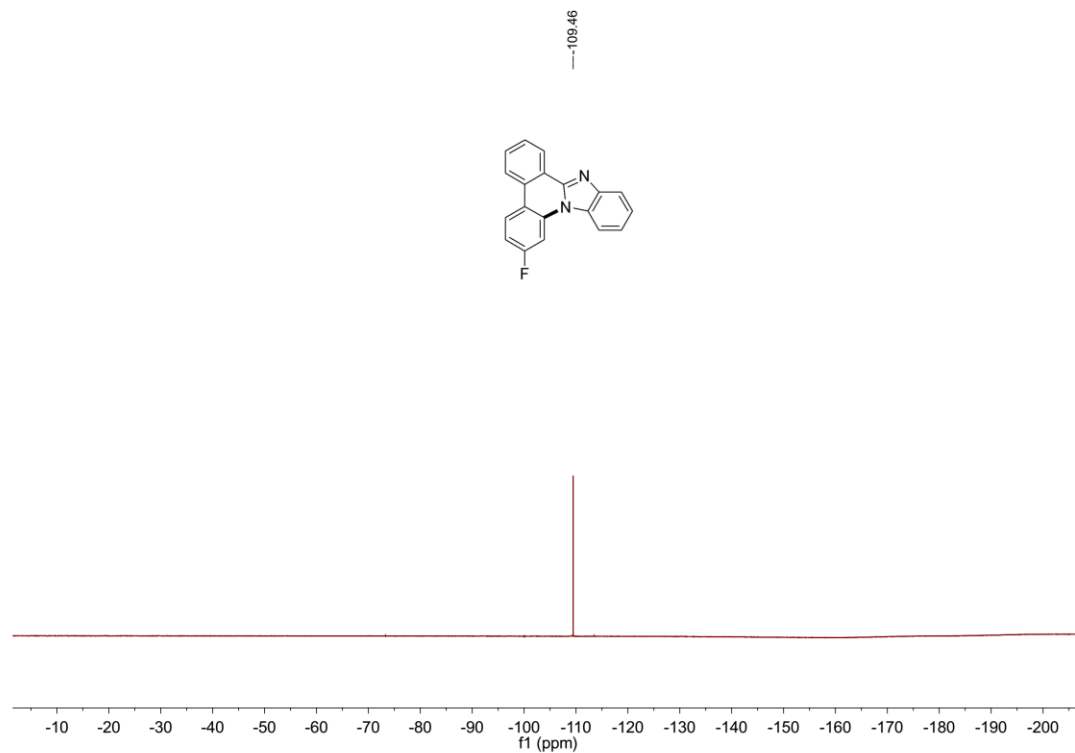



## 2h <sup>13</sup>C NMR

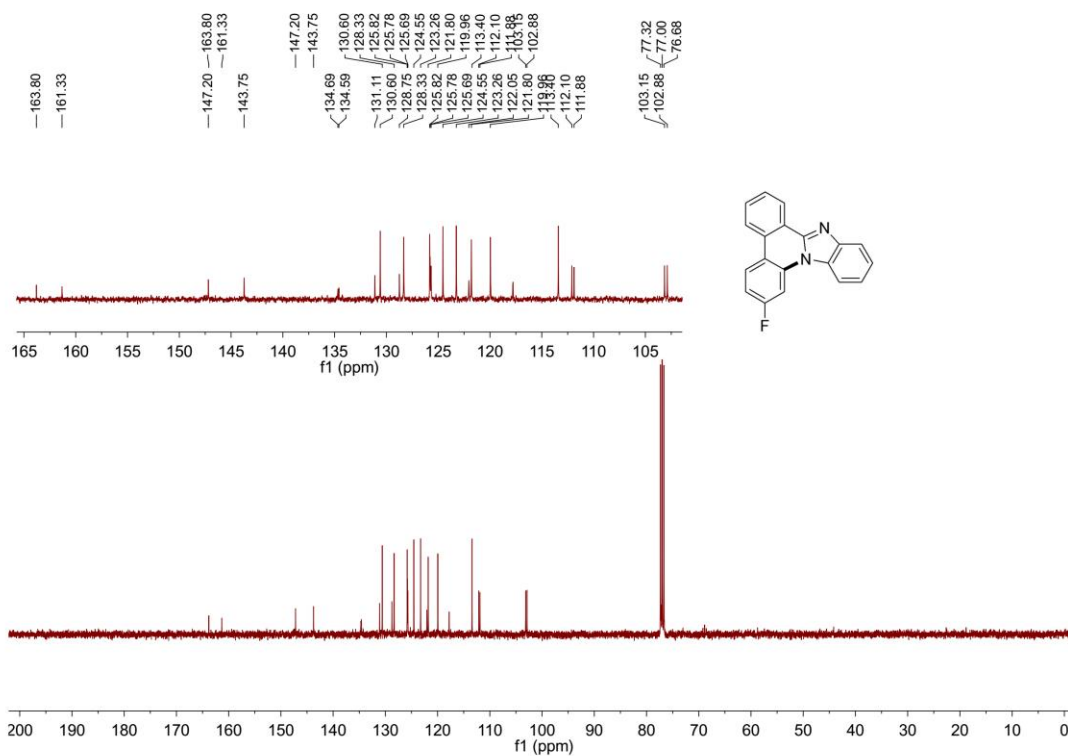

## 2i <sup>1</sup>H NMR

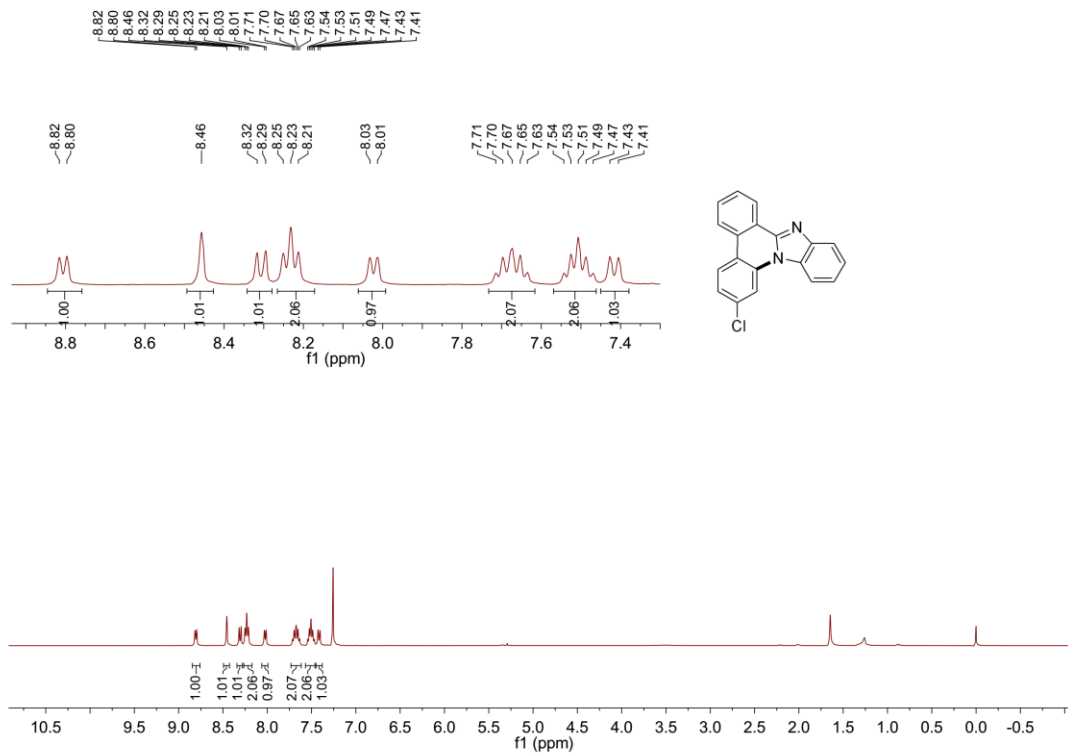

## 2i <sup>13</sup>C NMR

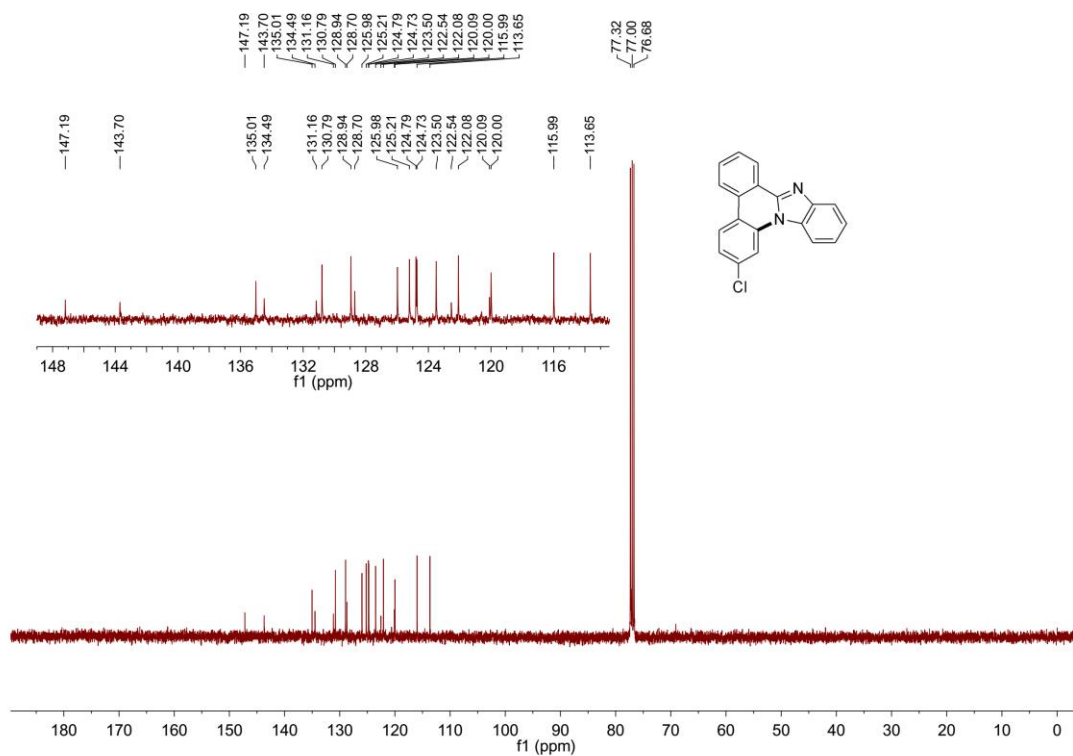

## 2j <sup>1</sup>H NMR

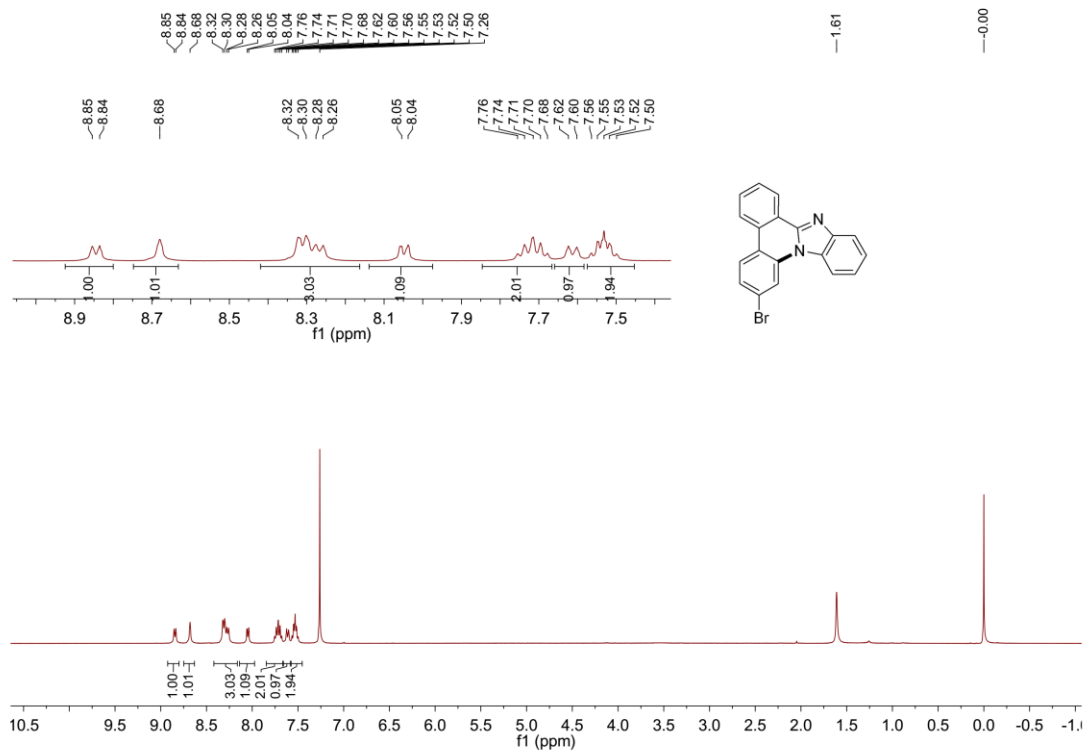

## 2j <sup>13</sup>C NMR

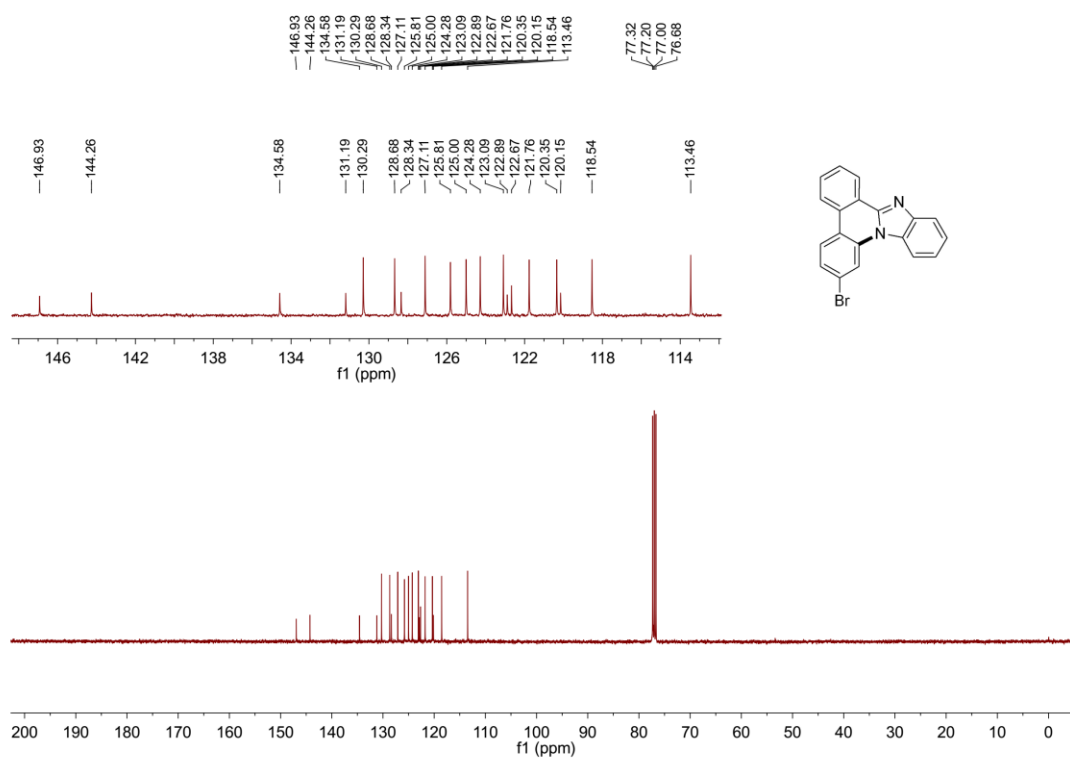

## 2k <sup>1</sup>H NMR

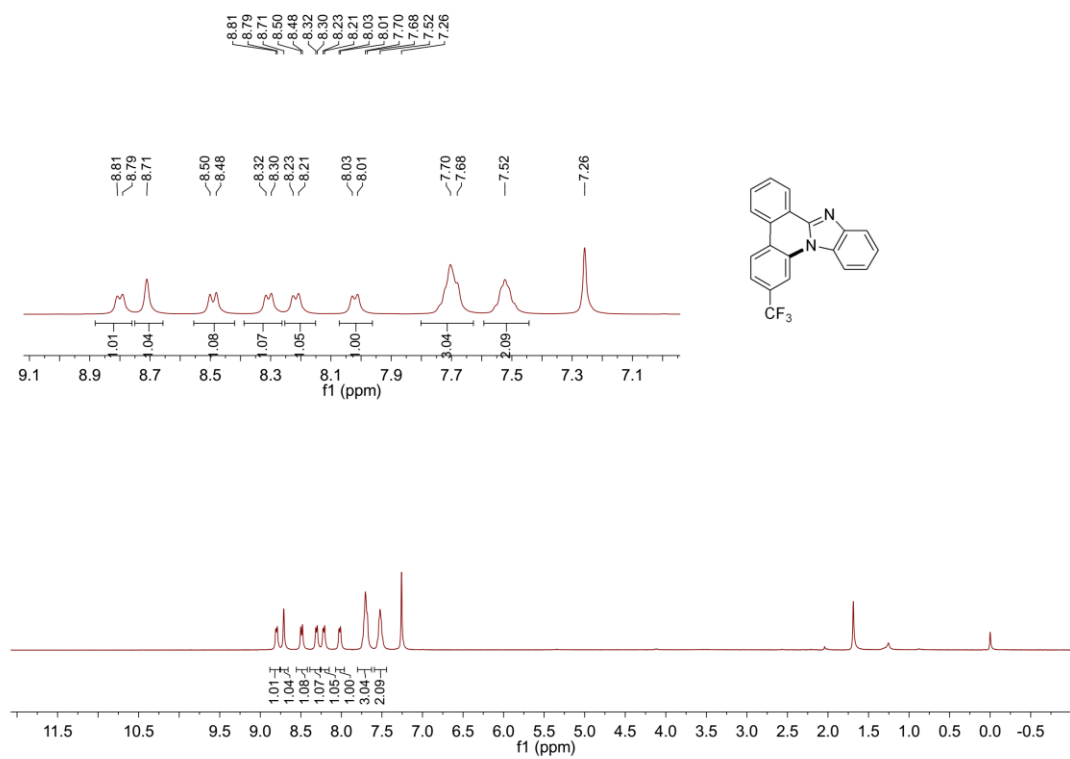

## 2k <sup>19</sup>F NMR

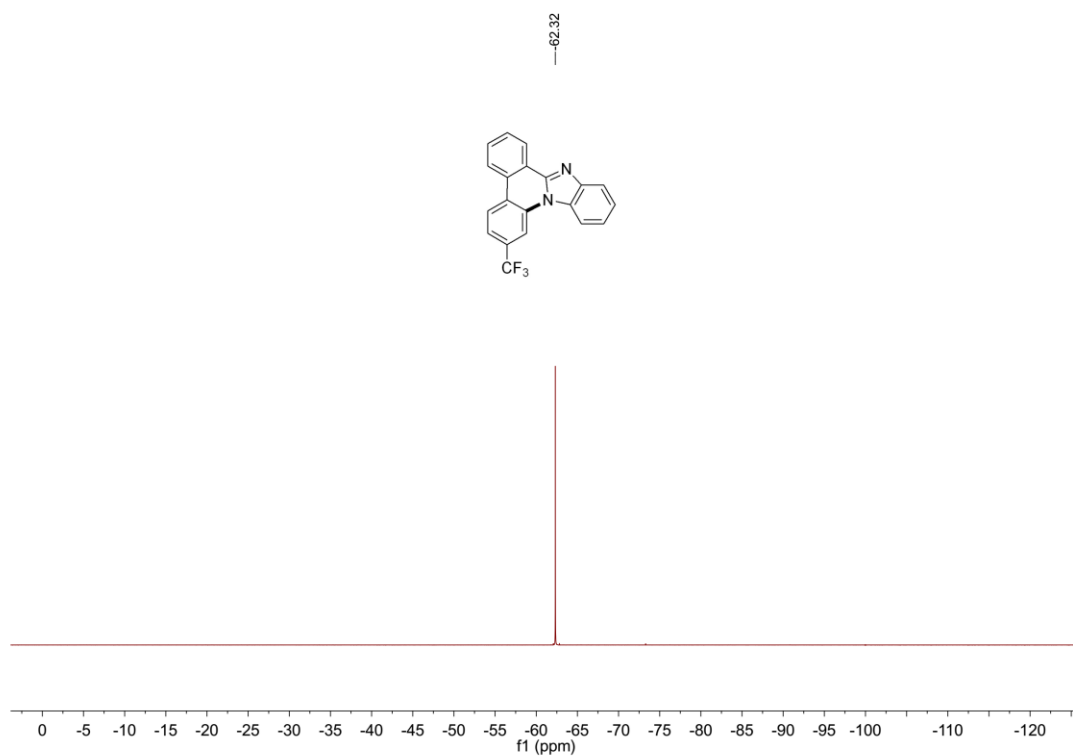

## 2k <sup>13</sup>C NMR

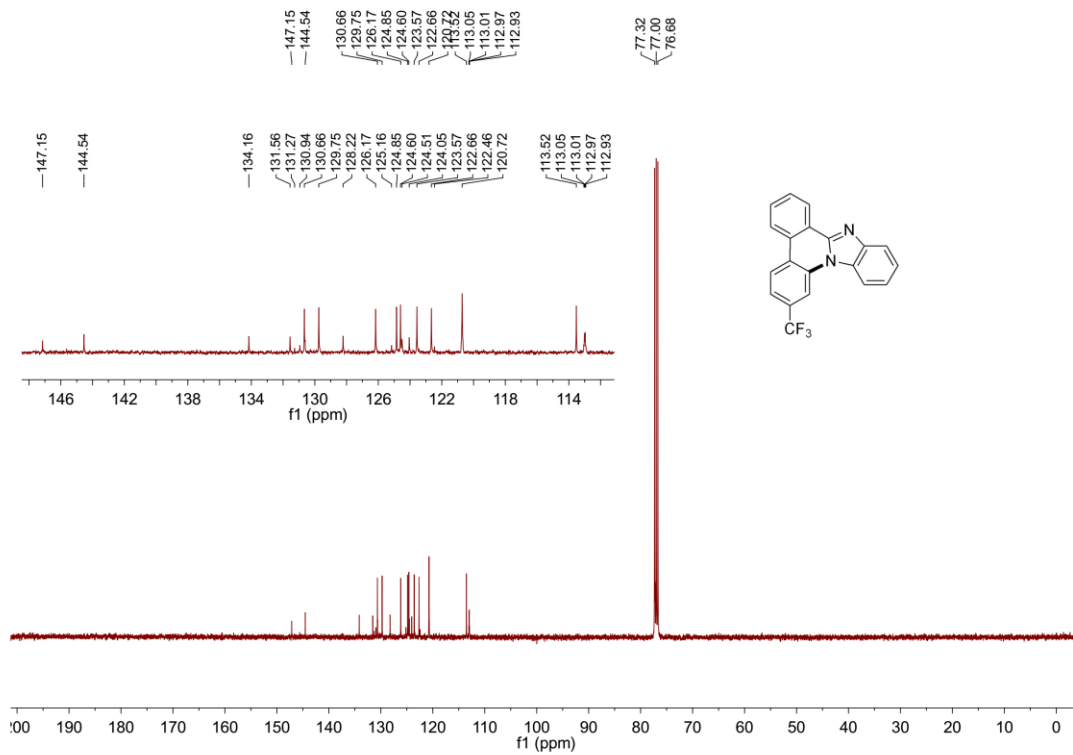

## 2I <sup>1</sup>H NMR

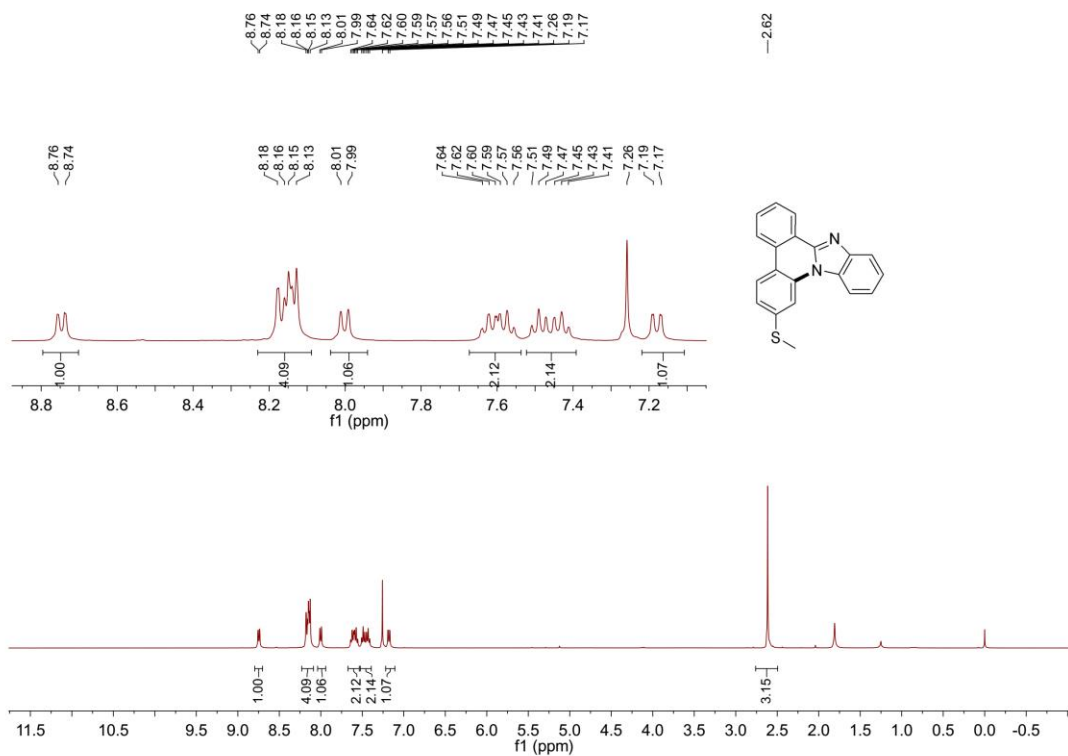

## 2I <sup>13</sup>C NMR

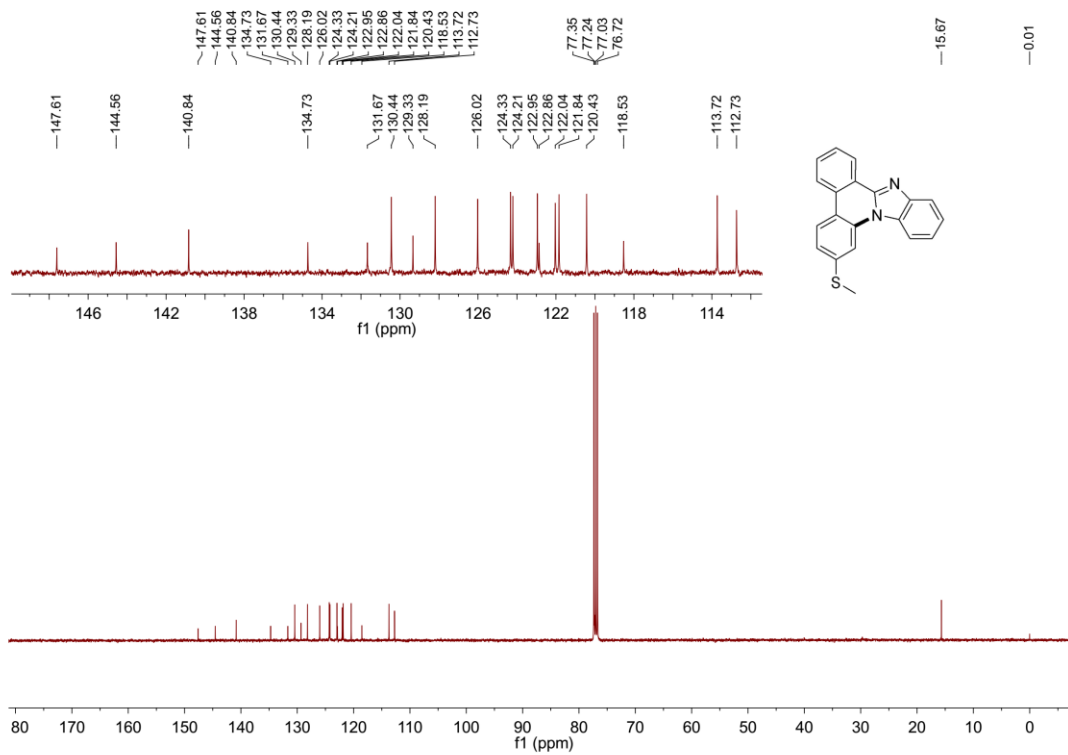

2m <sup>1</sup>H NMR

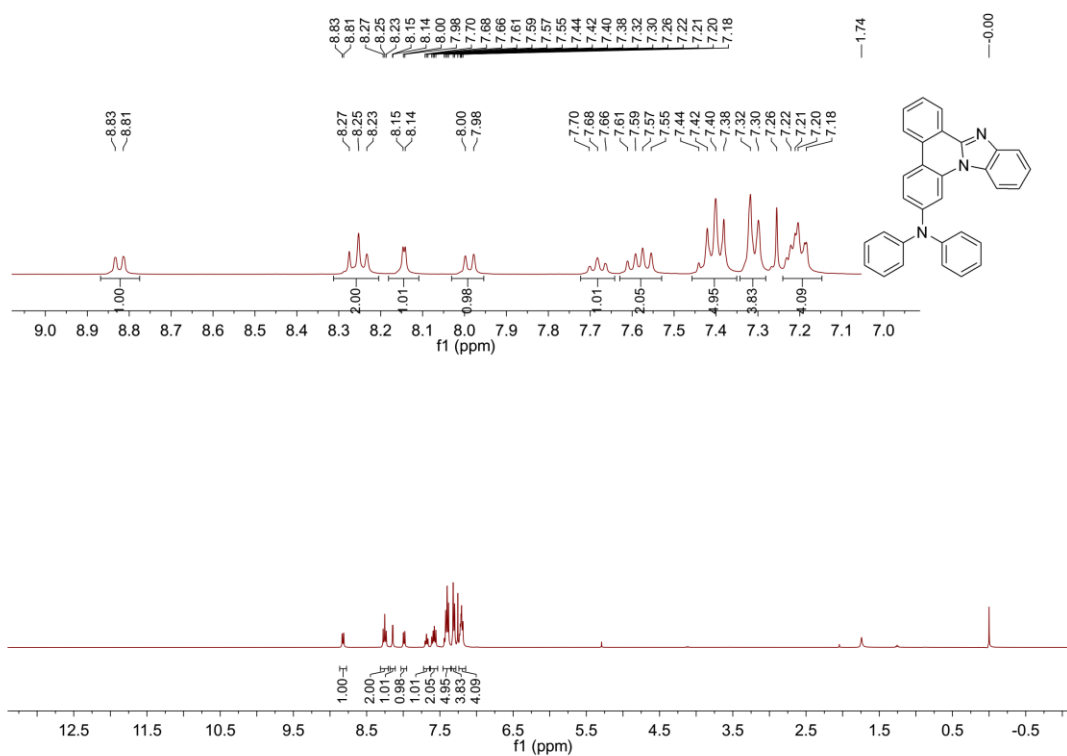

2m <sup>13</sup>C NMR

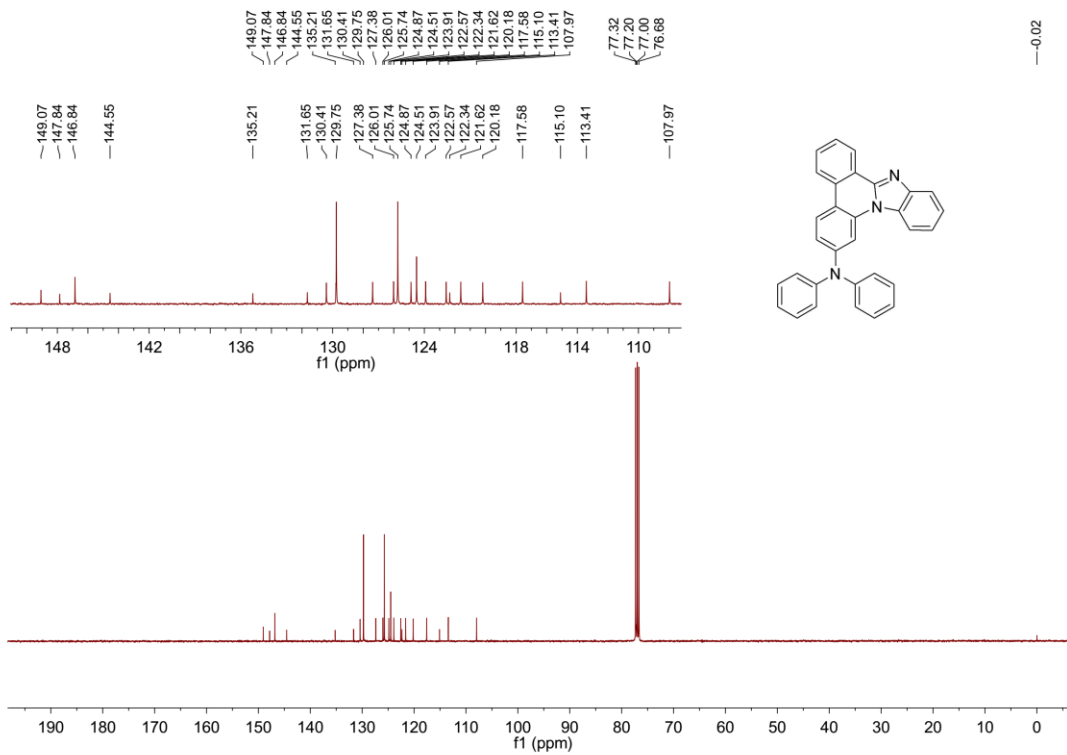

## 2n <sup>1</sup>H NMR

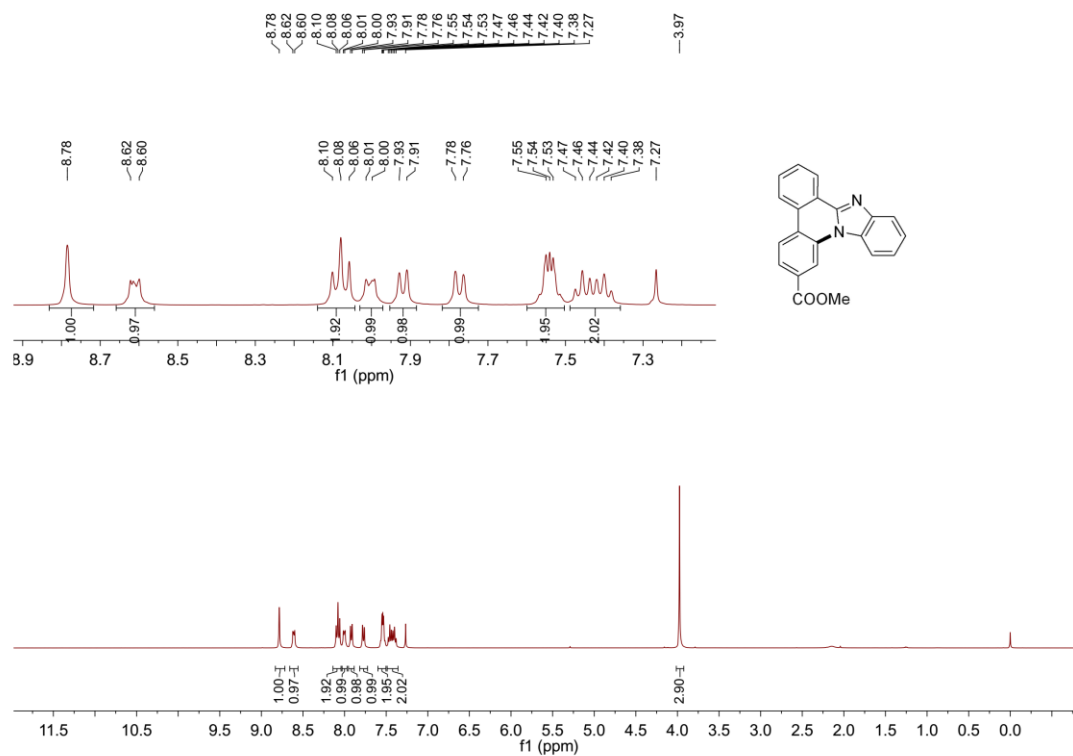

## 2n <sup>13</sup>C NMR

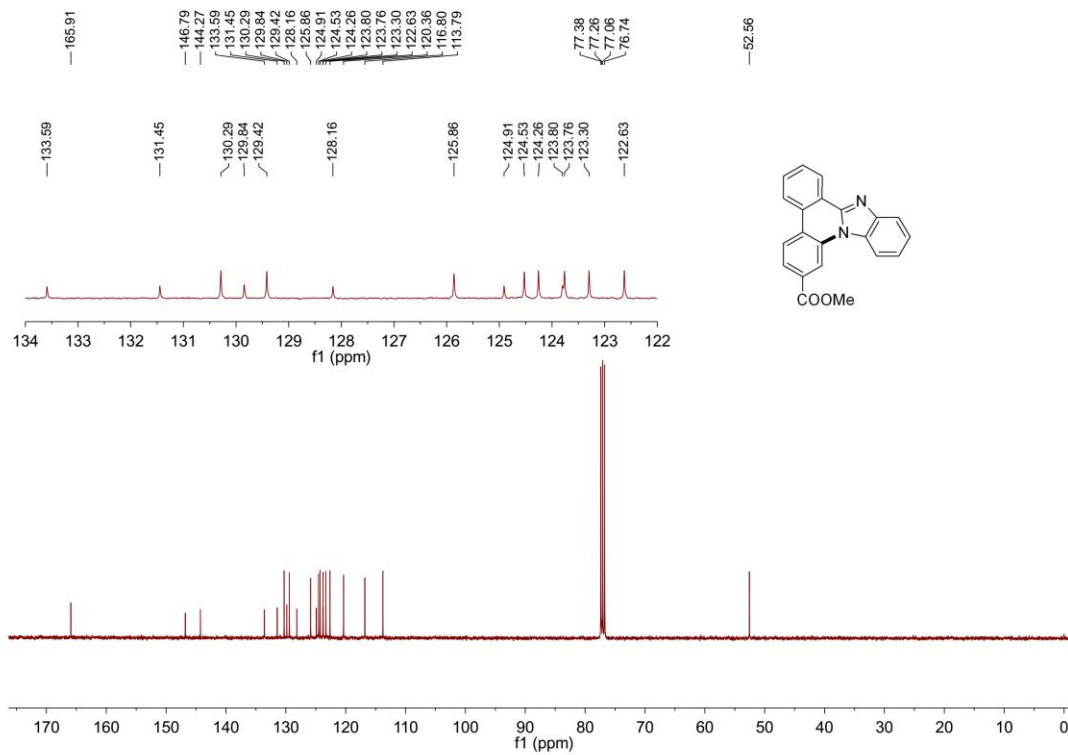

## 2o <sup>1</sup>H NMR

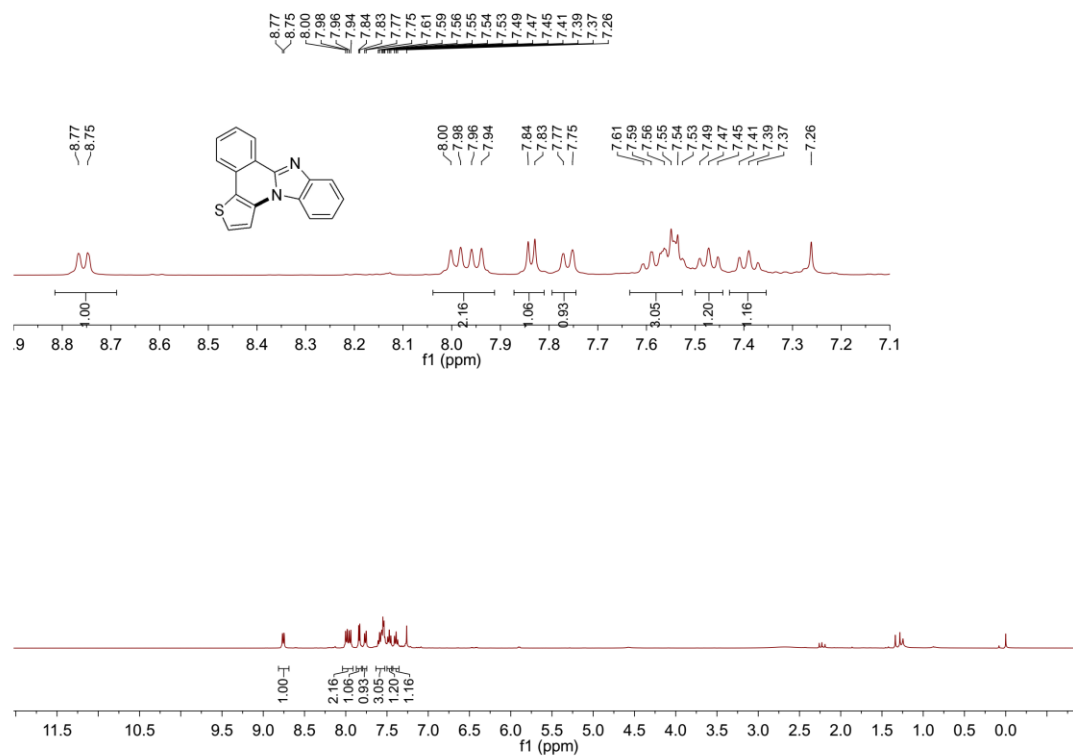

## 2o <sup>13</sup>C NMR

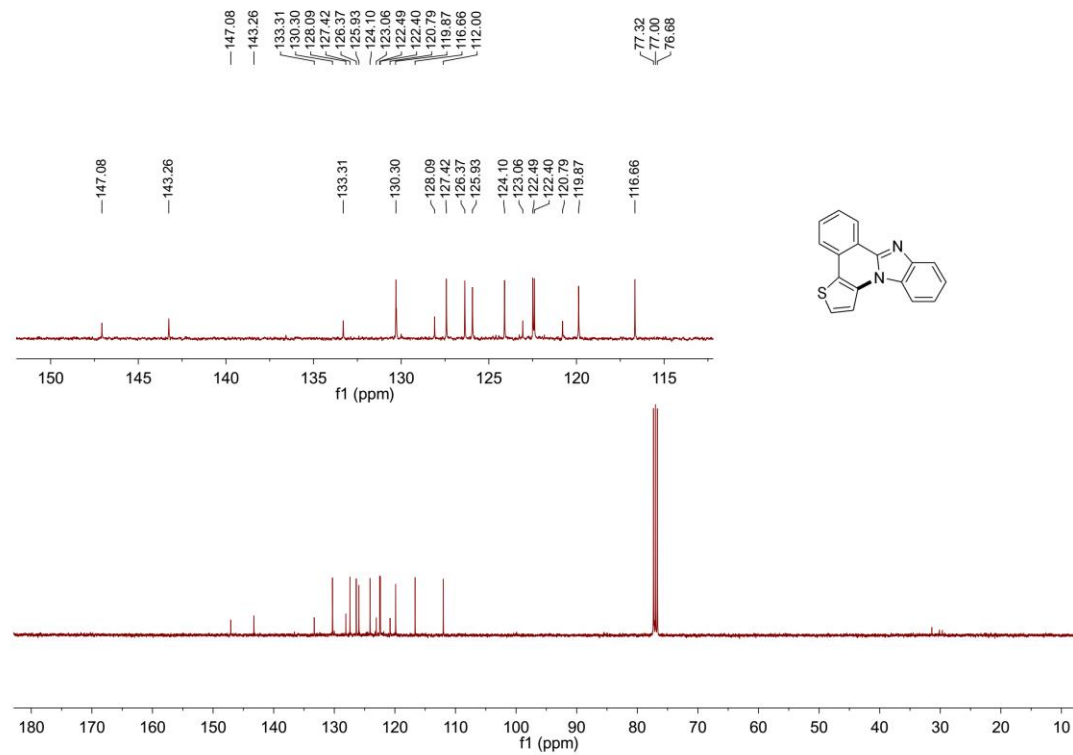



## 2p <sup>1</sup>H NMR

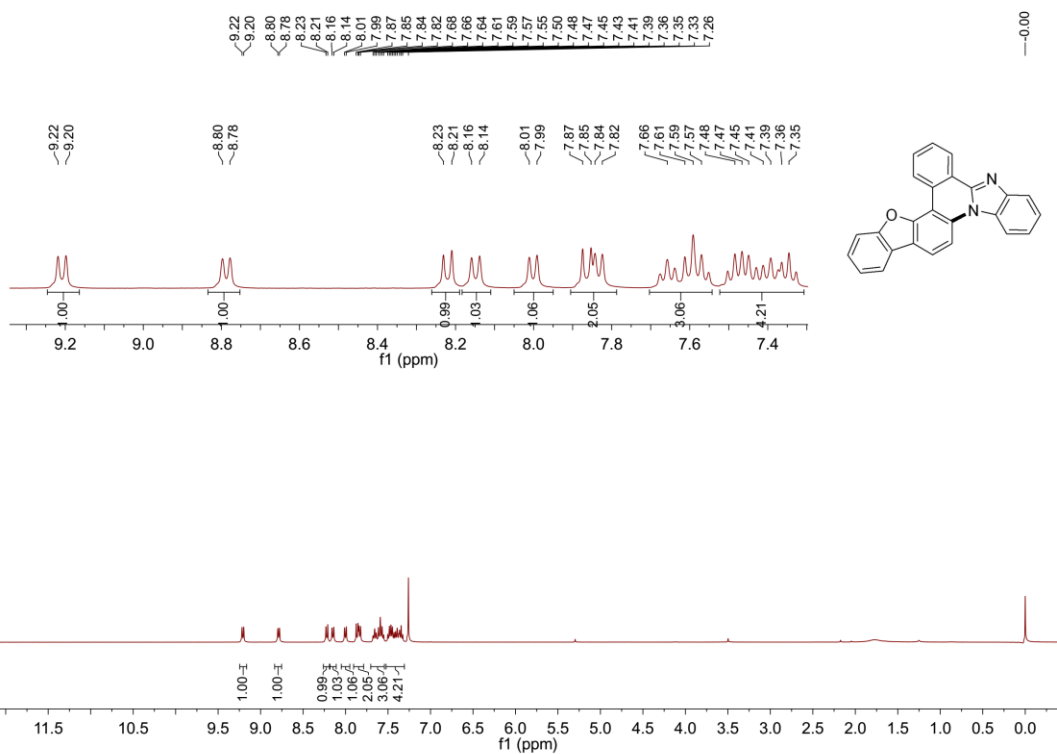

## 2p <sup>13</sup>C NMR

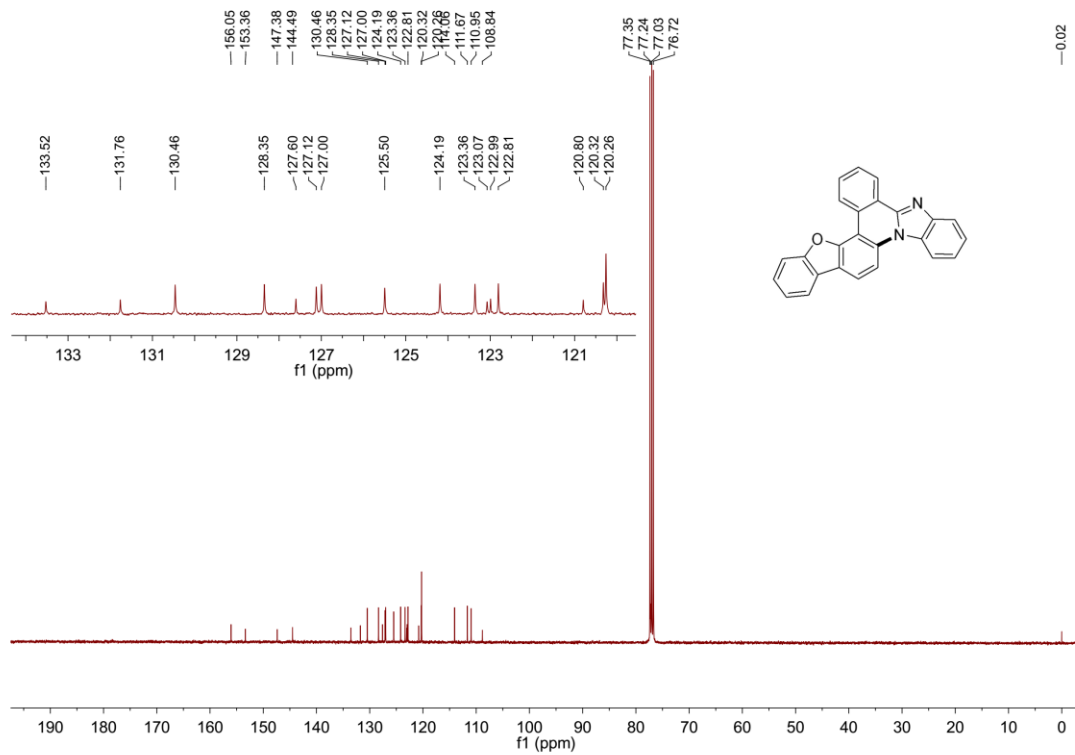

## 2q <sup>1</sup>H NMR

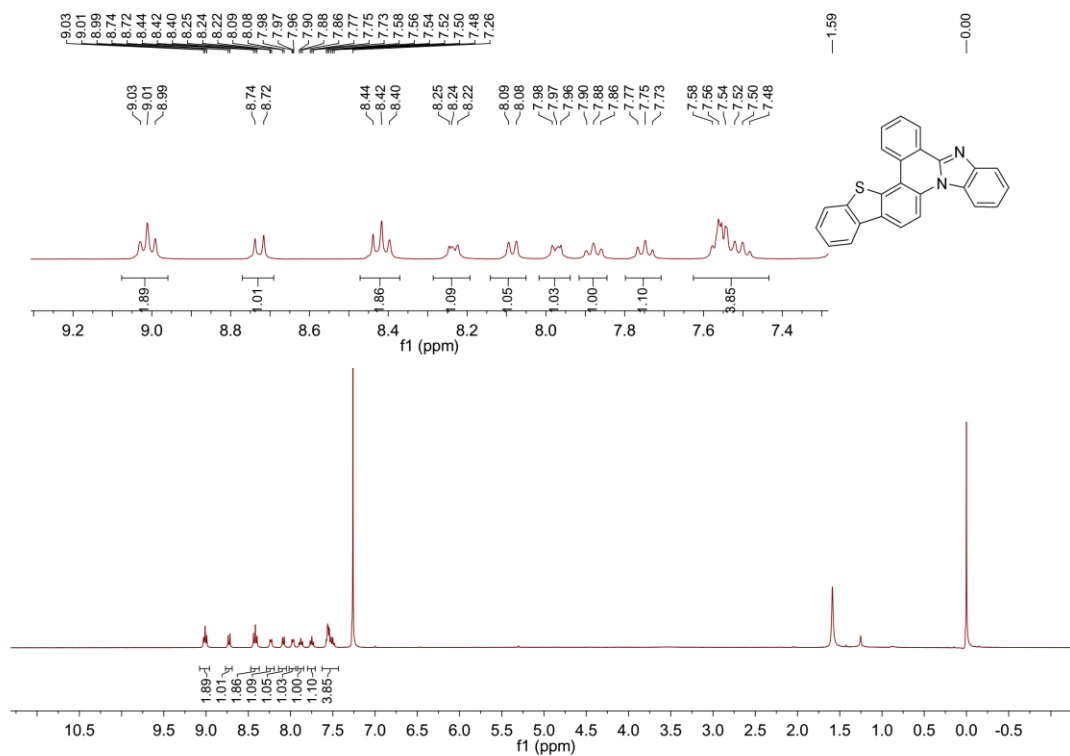

## 2q <sup>13</sup>C NMR

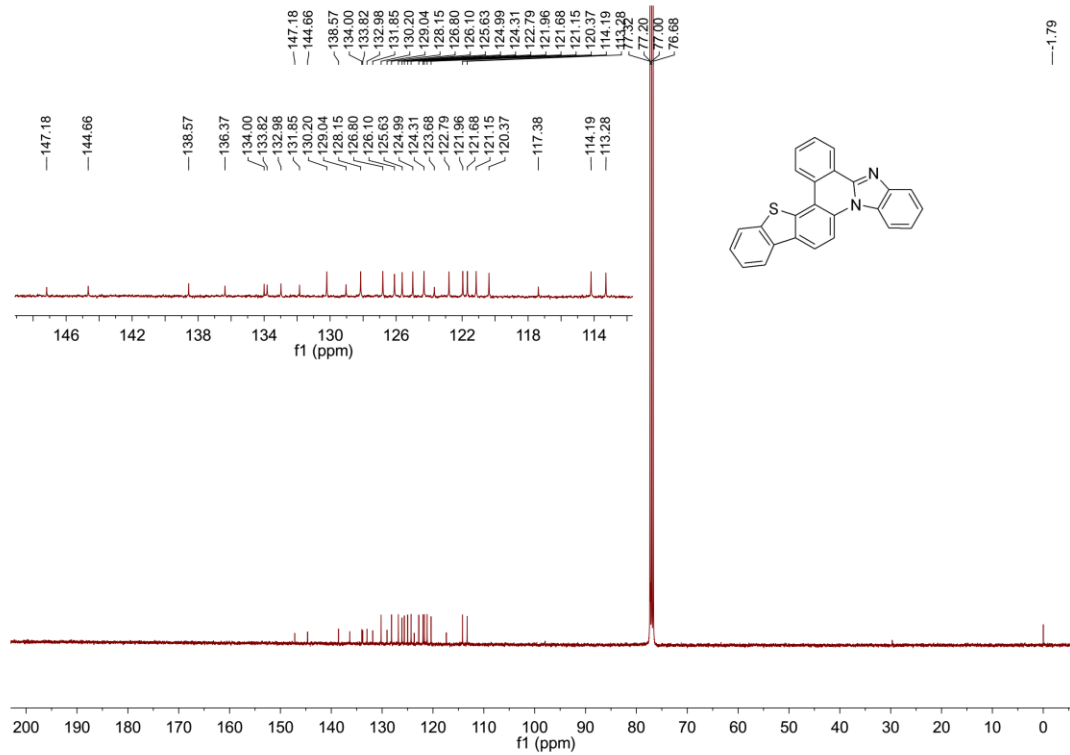

## 2r <sup>1</sup>H NMR

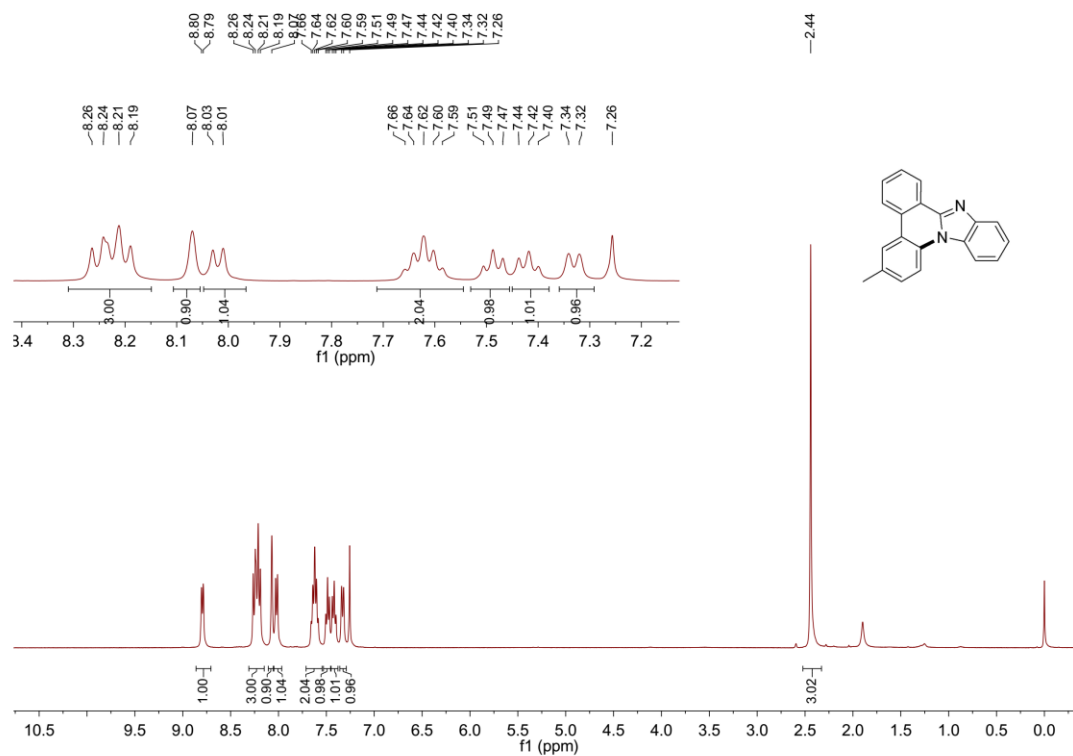

## 2r <sup>13</sup>C NMR

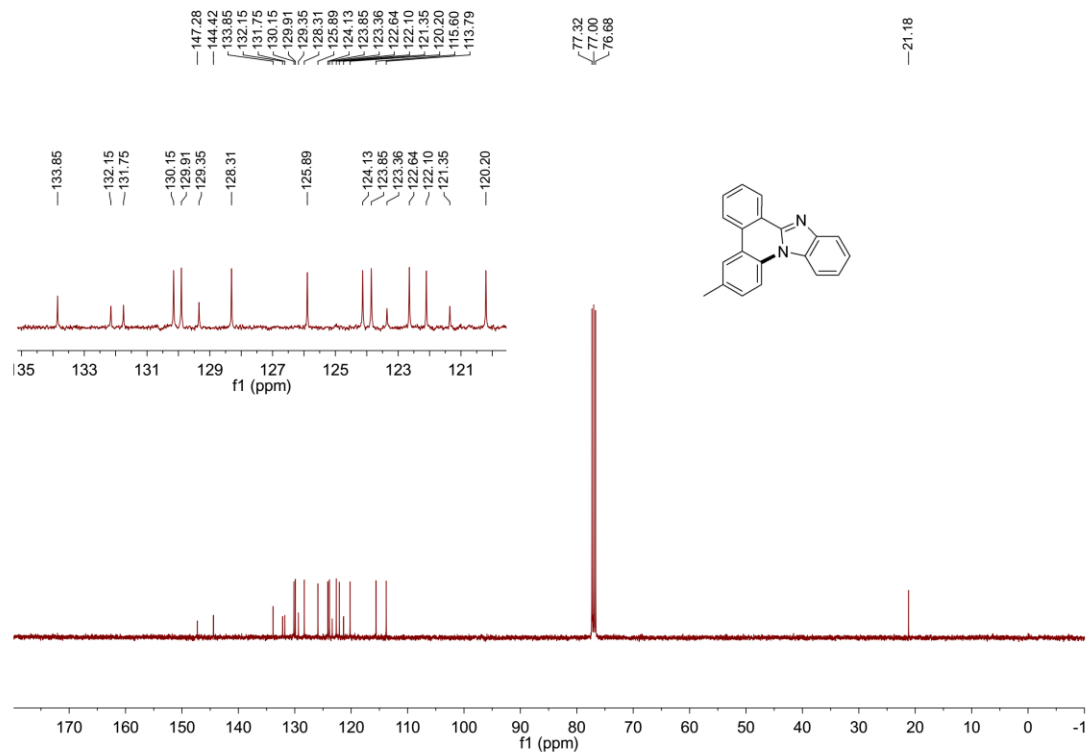

2s <sup>1</sup>H NMR

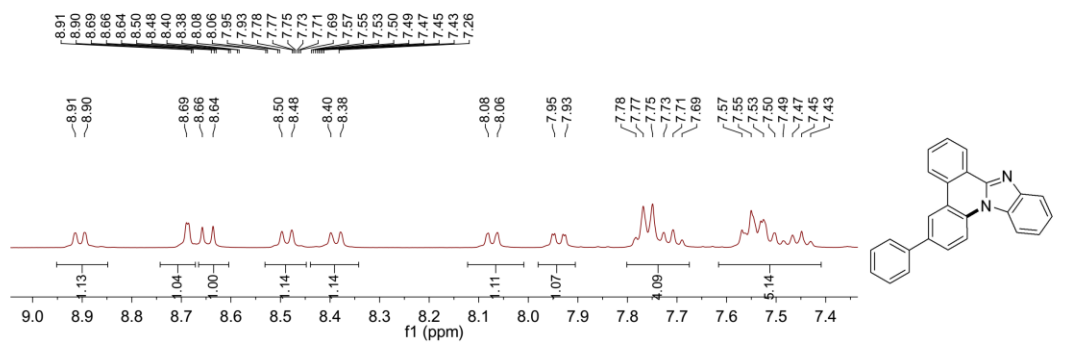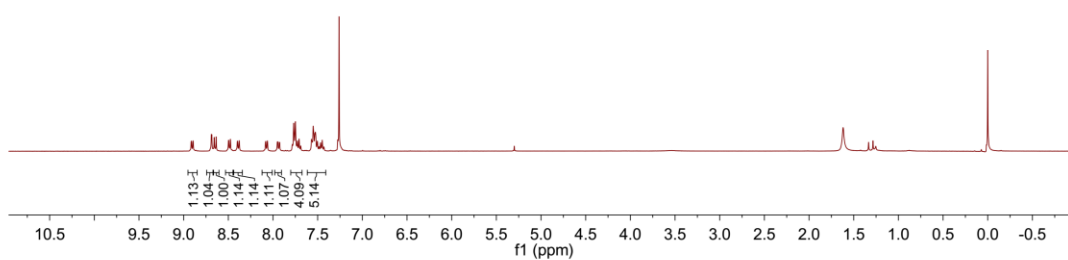

2s <sup>13</sup>C NMR

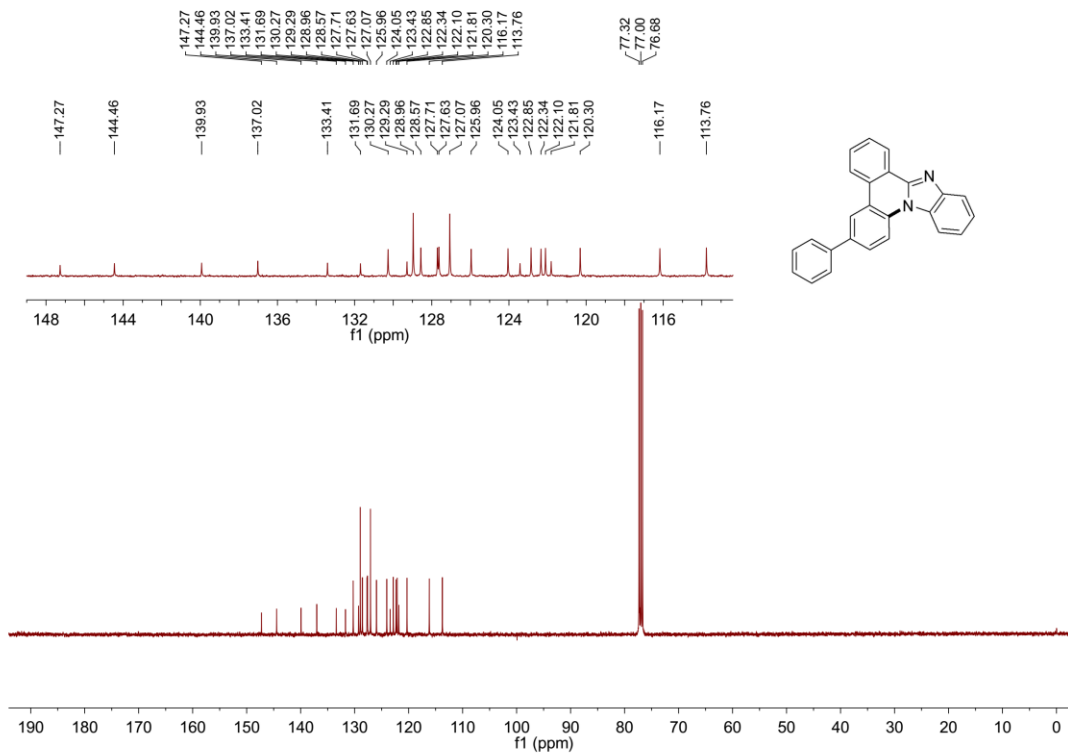

## 2t <sup>1</sup>H NMR

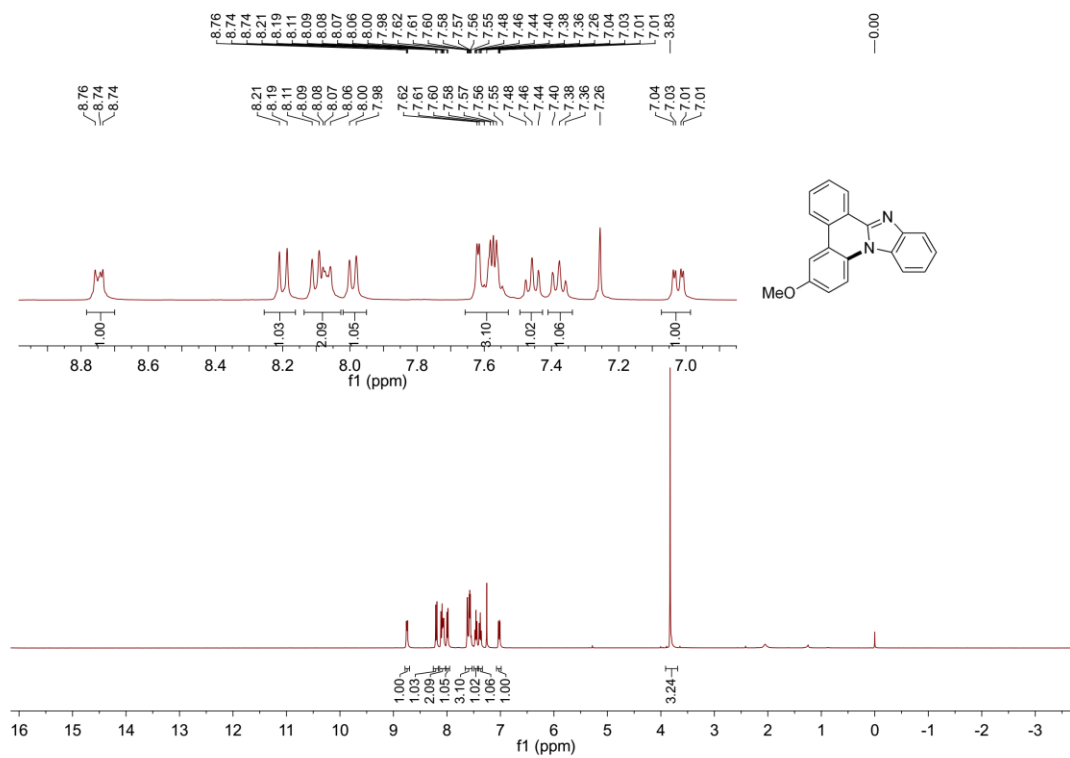

## 2t <sup>13</sup>C NMR

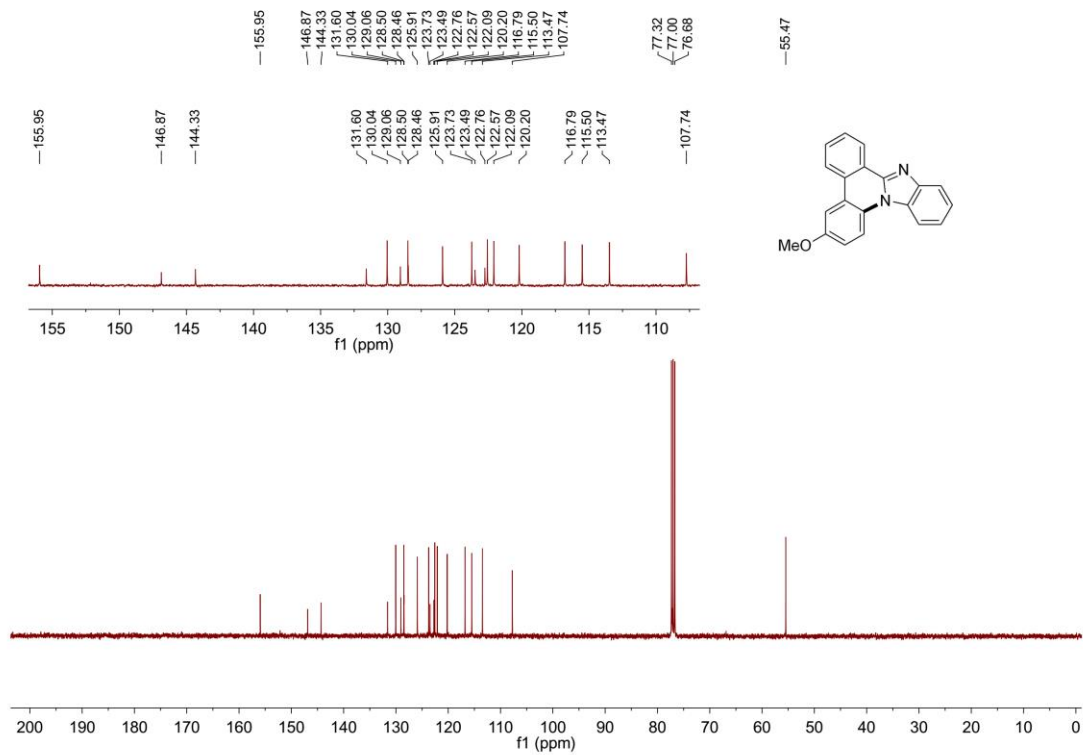

## 2u <sup>1</sup>H NMR

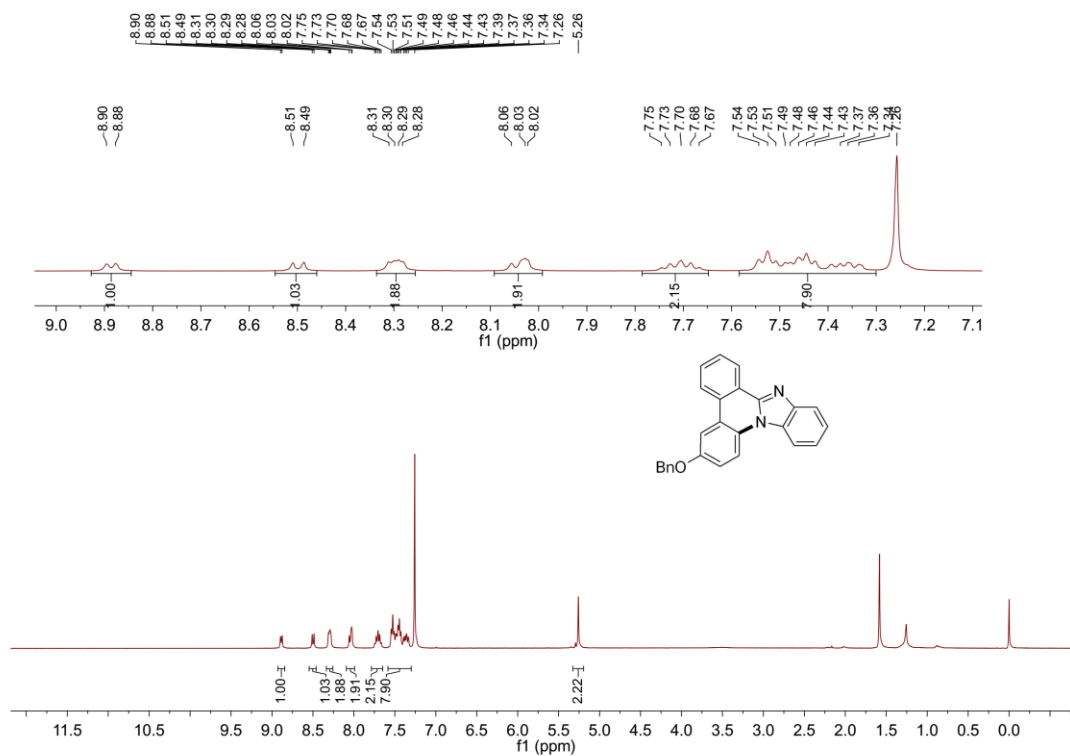

## 2u <sup>13</sup>C NMR

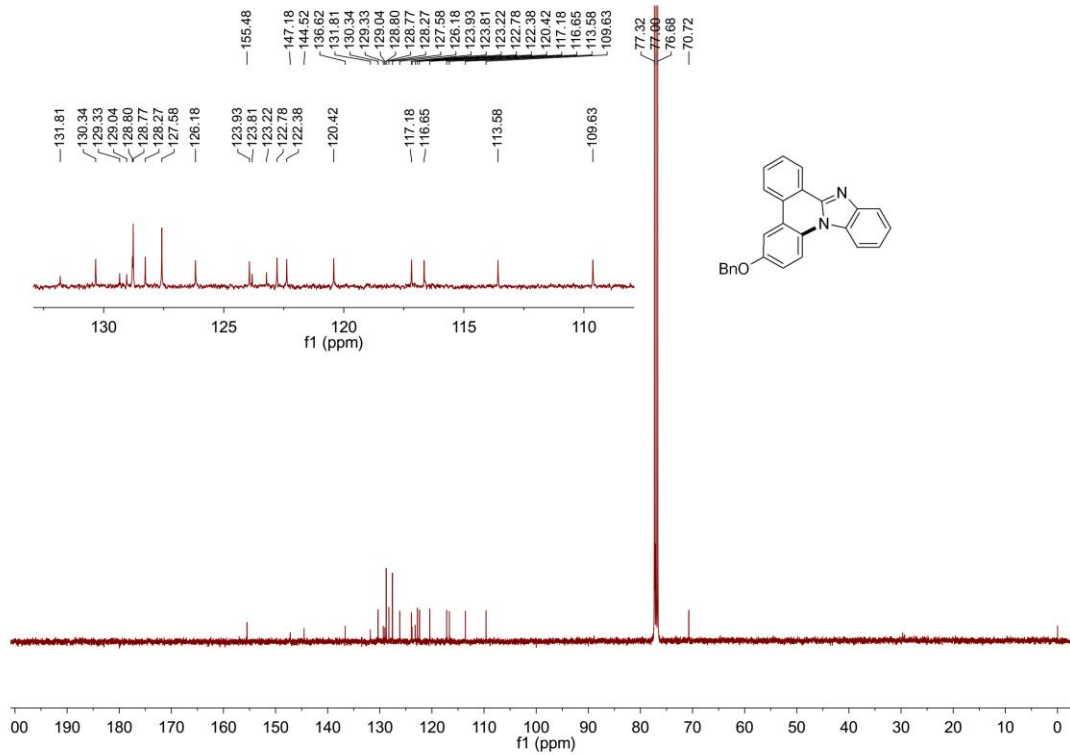

## 2v <sup>1</sup>H NMR

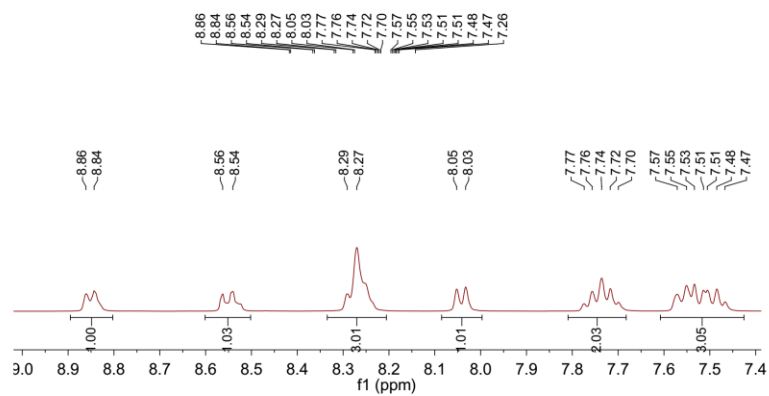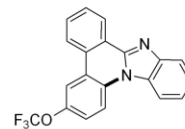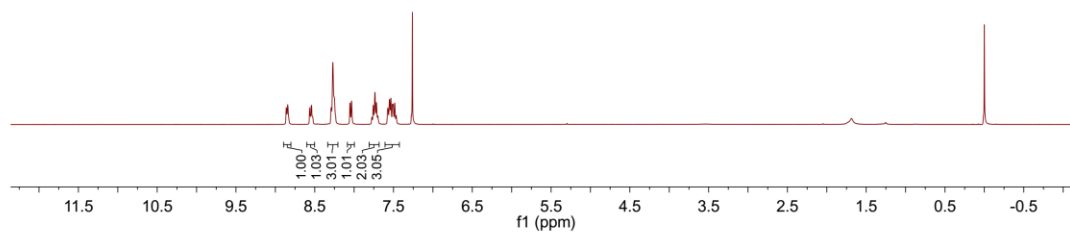

## 2v <sup>19</sup>F NMR

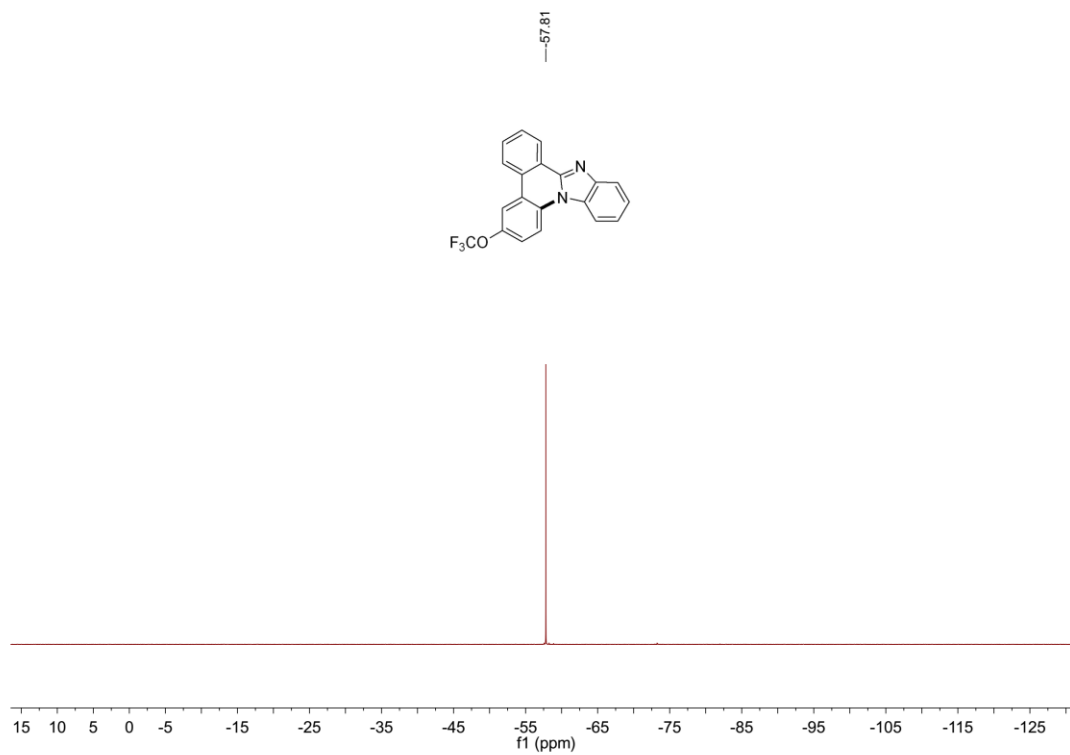

## 2v <sup>13</sup>C NMR

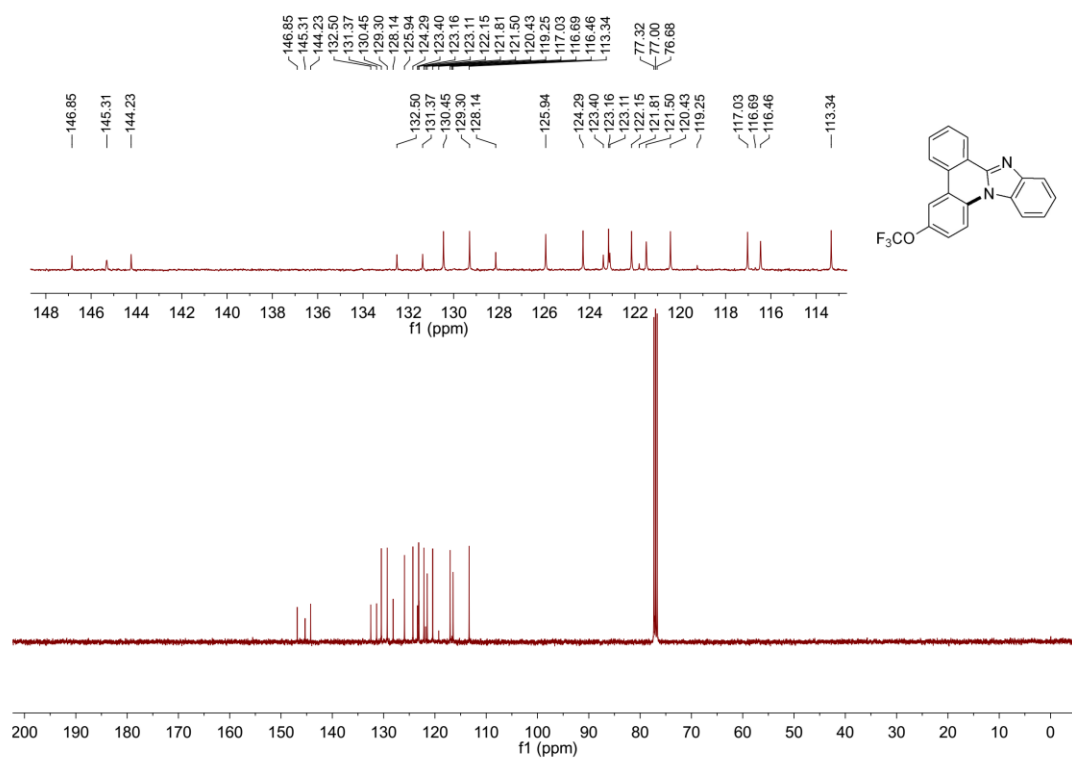

## 2w <sup>1</sup>H NMR

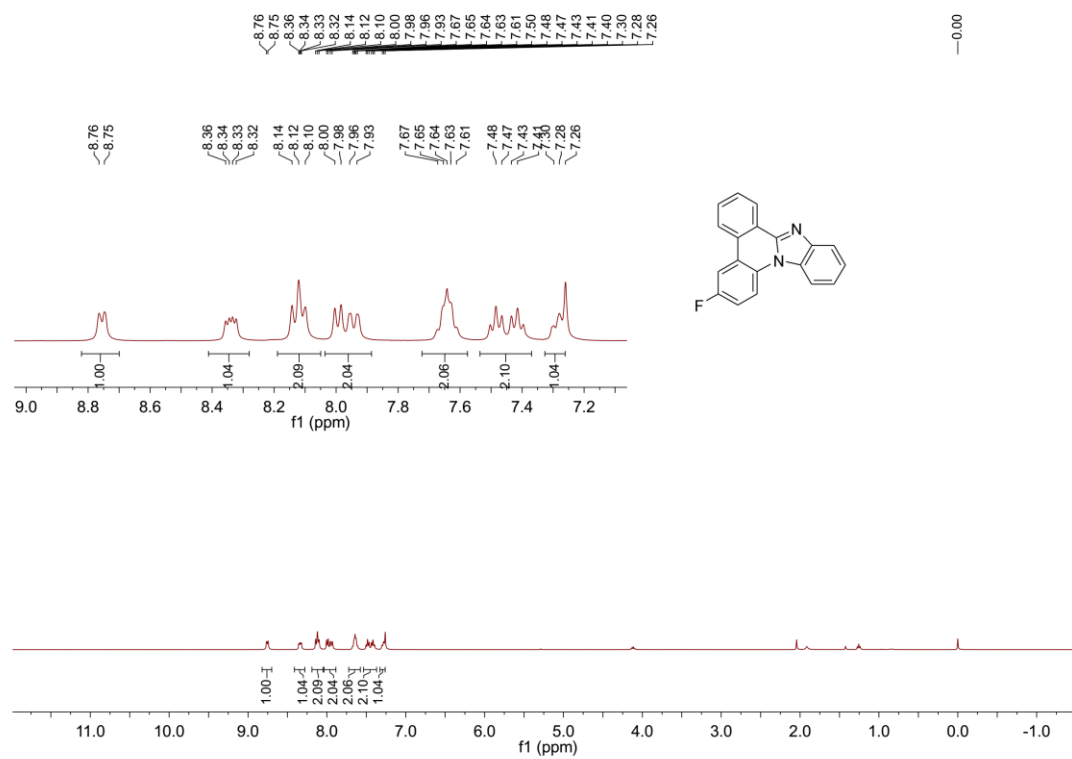



### 2w <sup>19</sup>F NMR

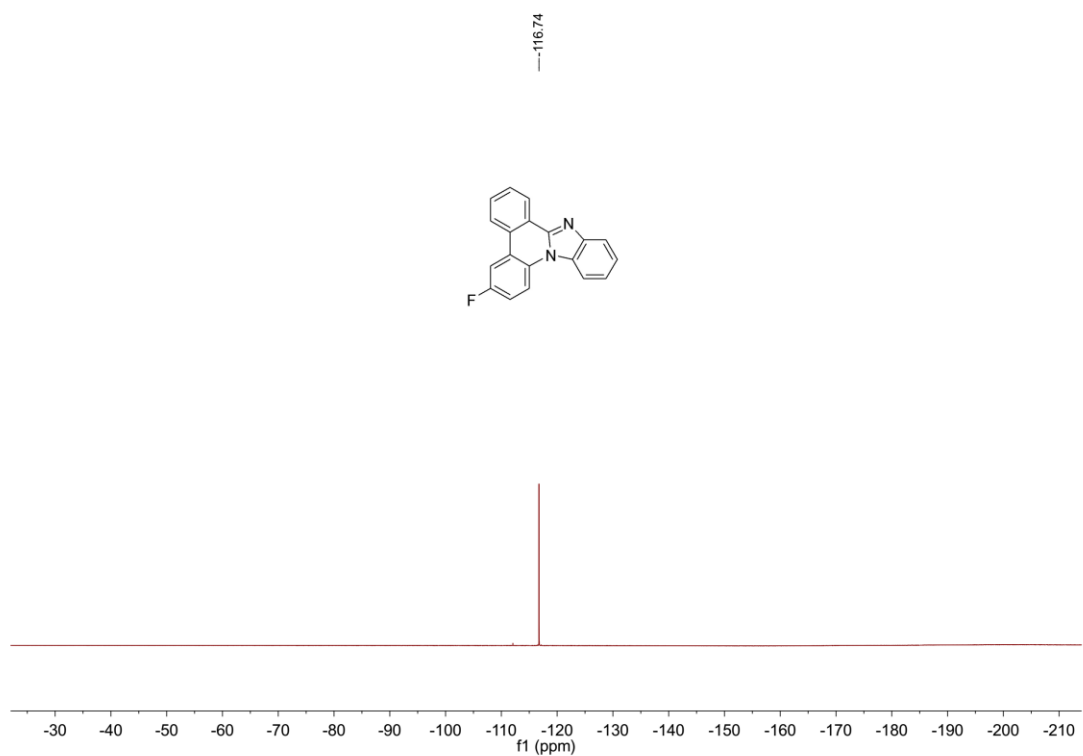

### 2w <sup>13</sup>C NMR

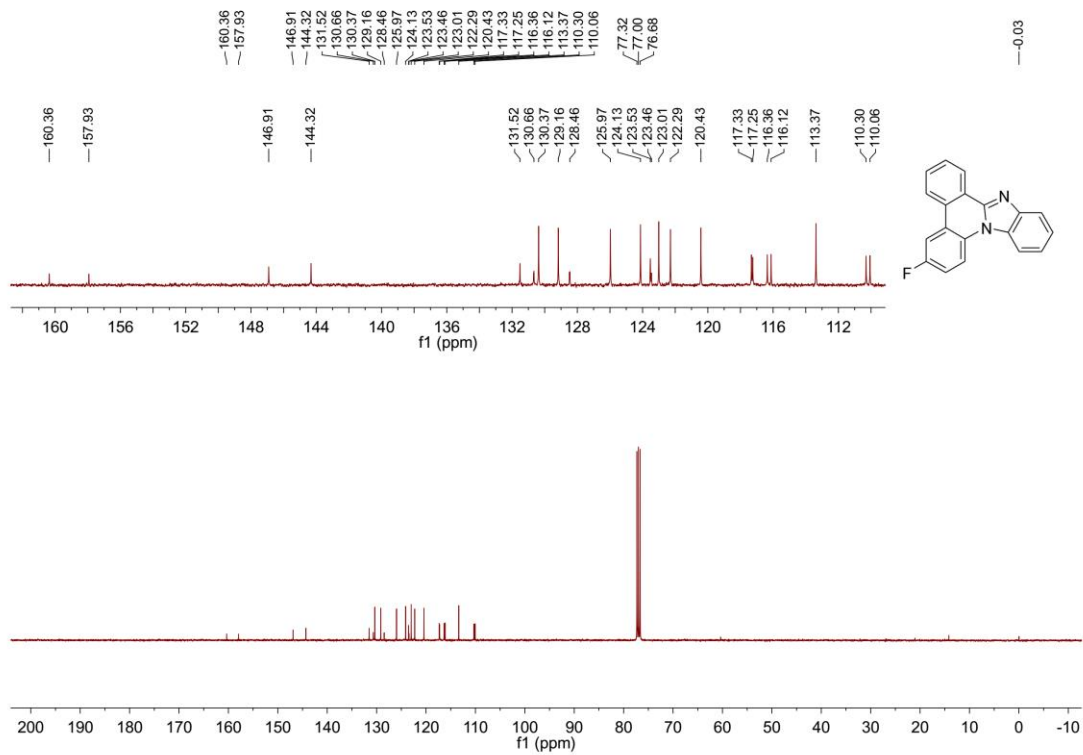

## 2x <sup>1</sup>H NMR

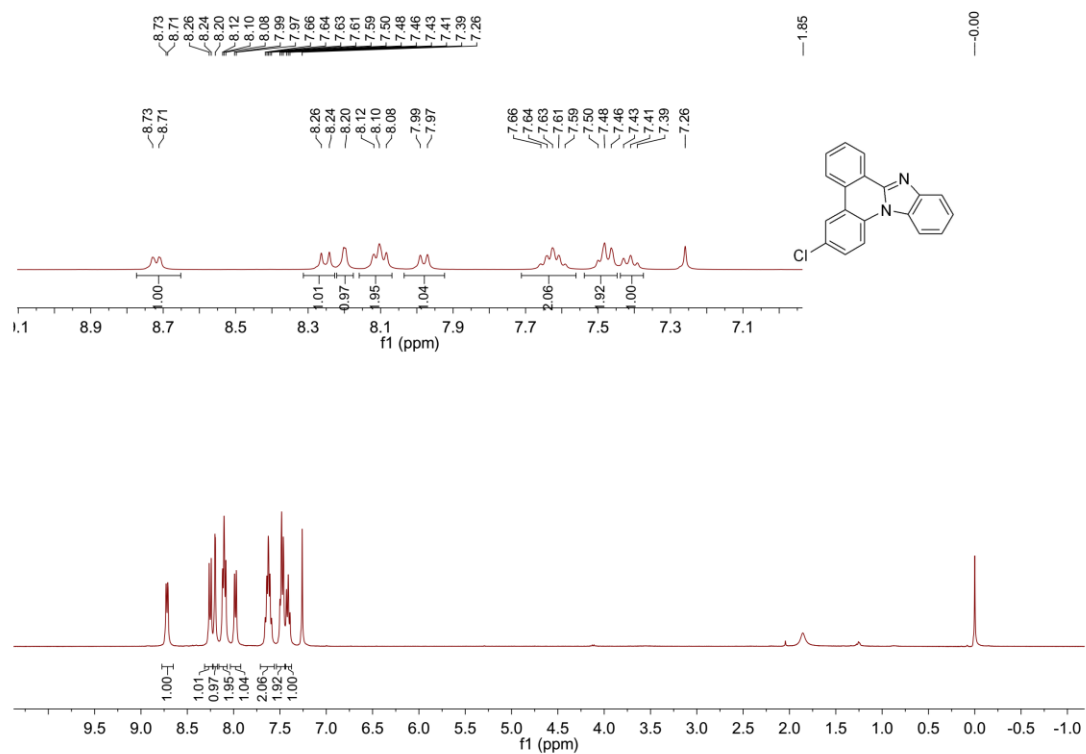

## 2x <sup>13</sup>C NMR

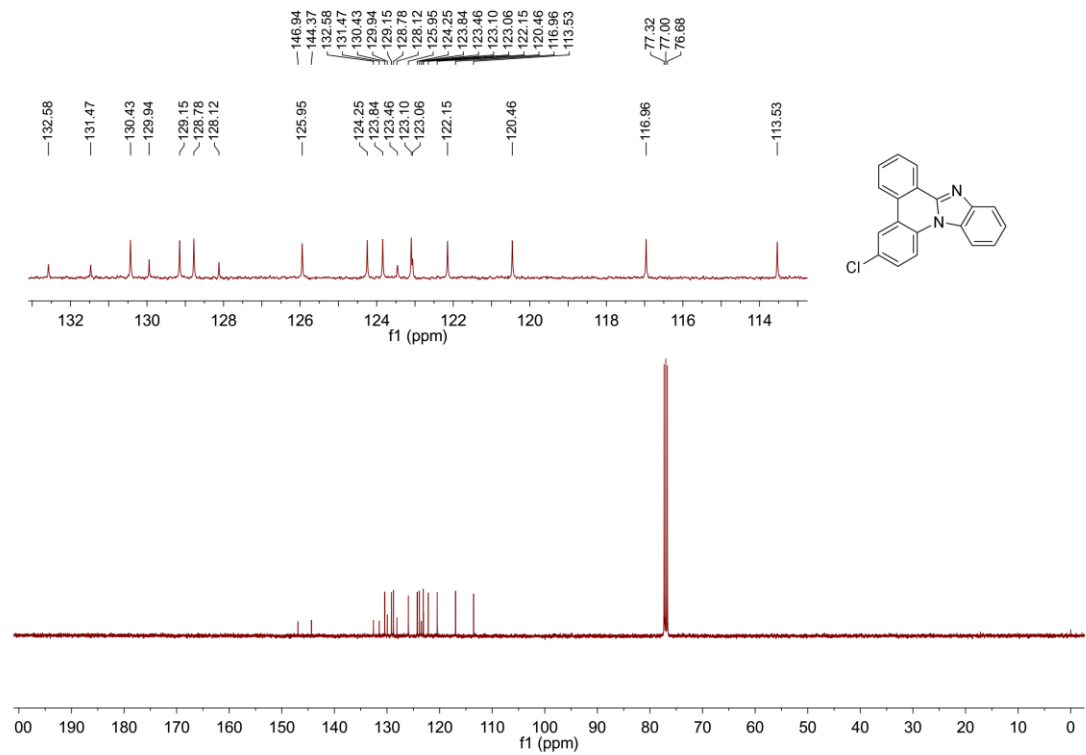

## 2y <sup>1</sup>H NMR

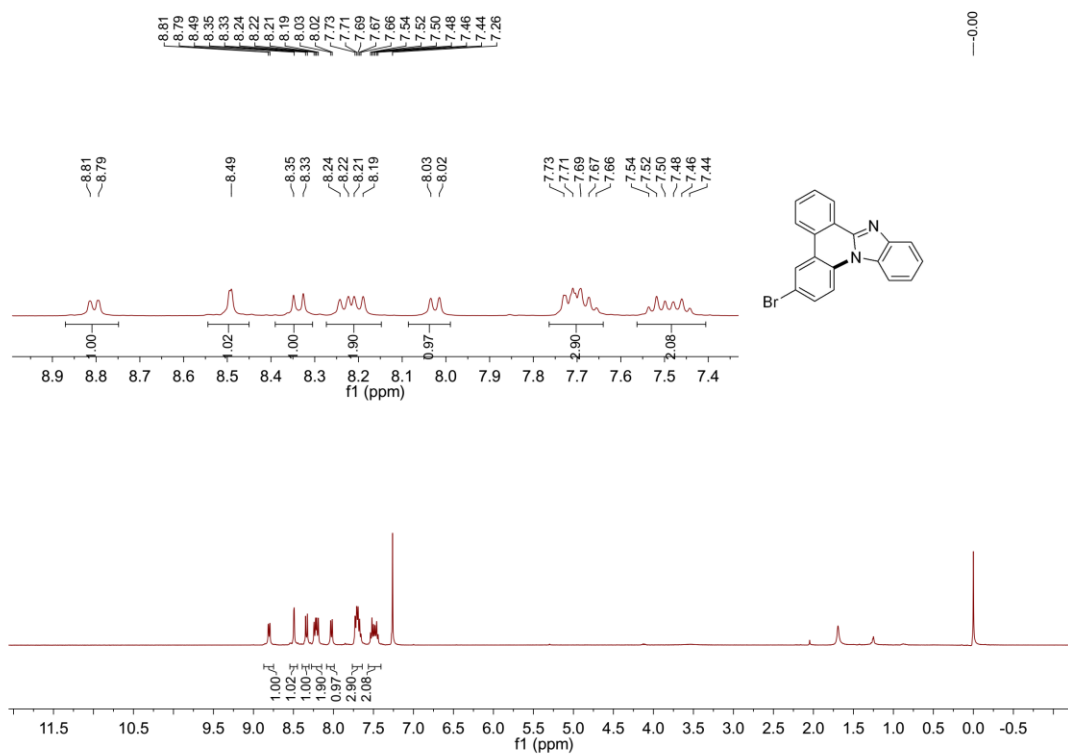

## 2y <sup>13</sup>C NMR

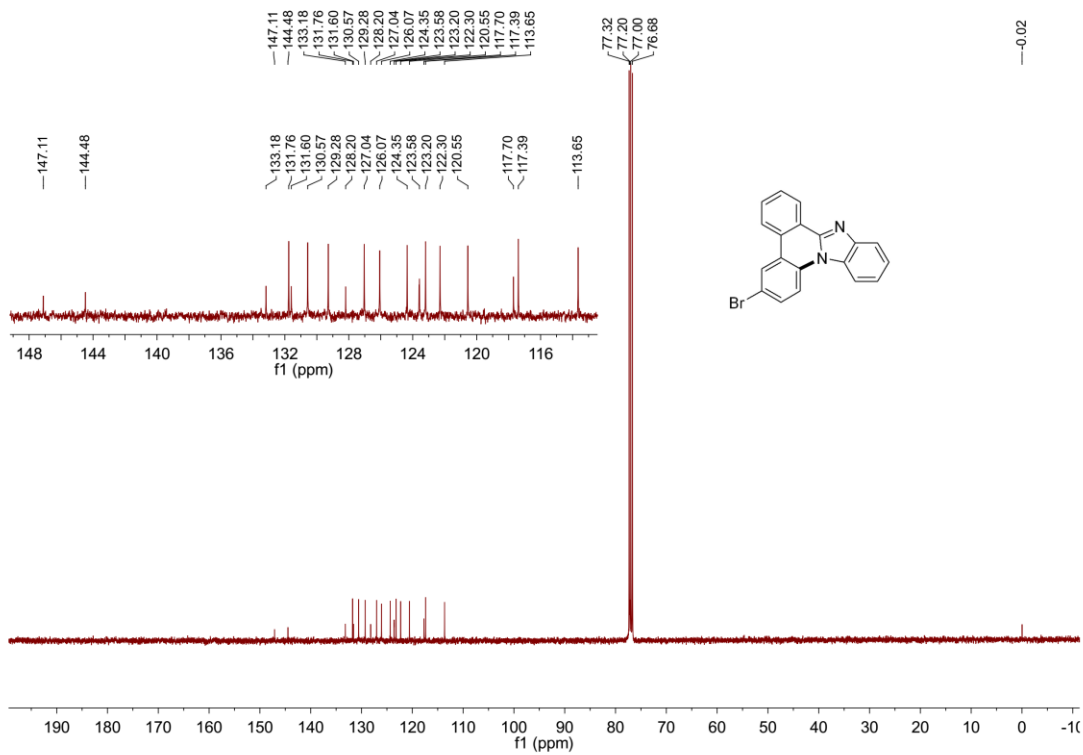

## 2z <sup>1</sup>H NMR

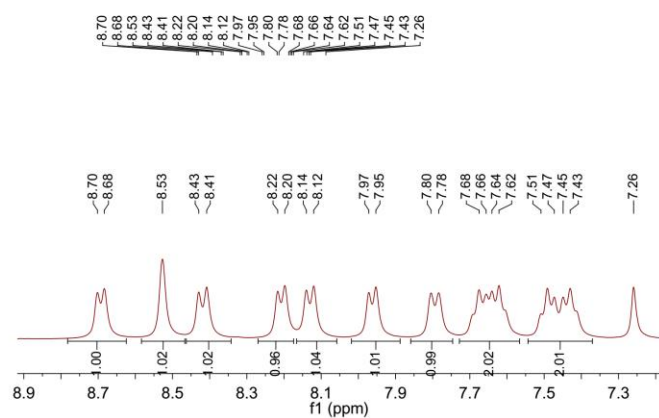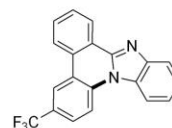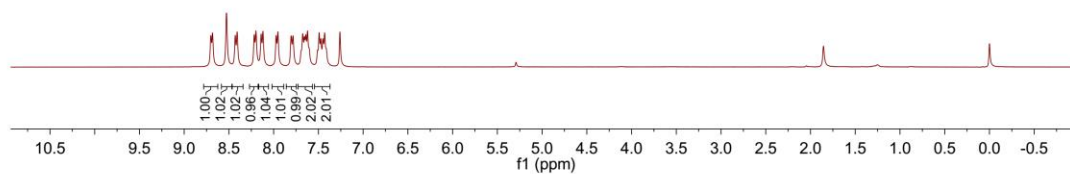

## 2z <sup>19</sup>F NMR

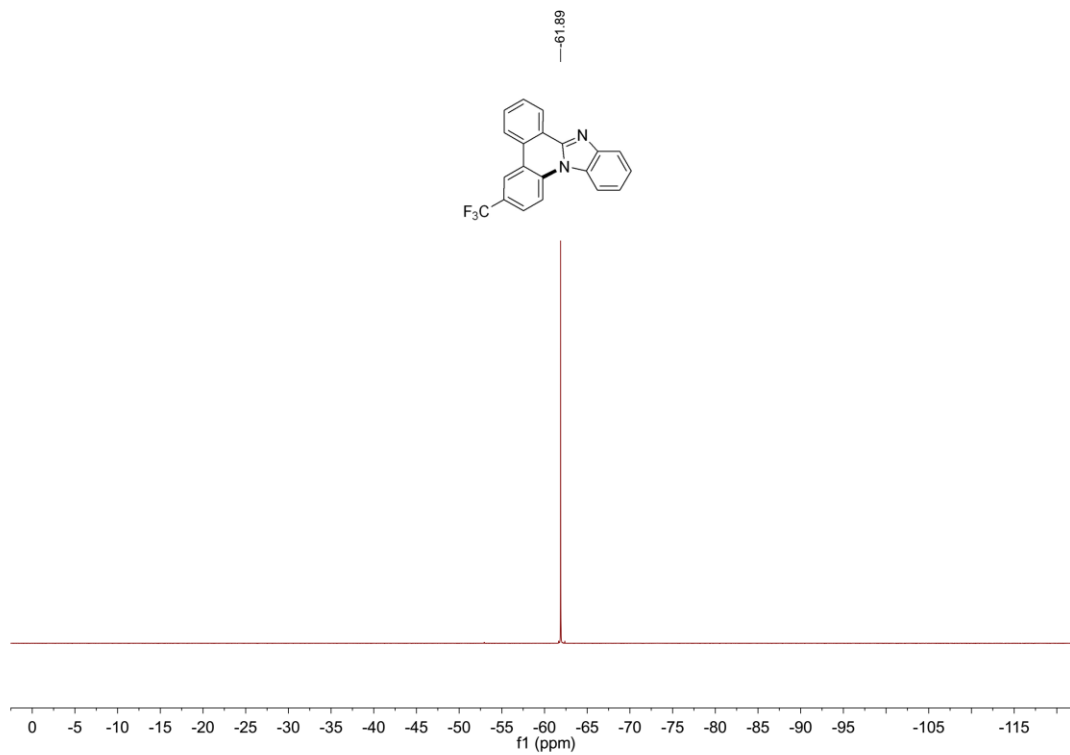

2z <sup>13</sup>C NMR

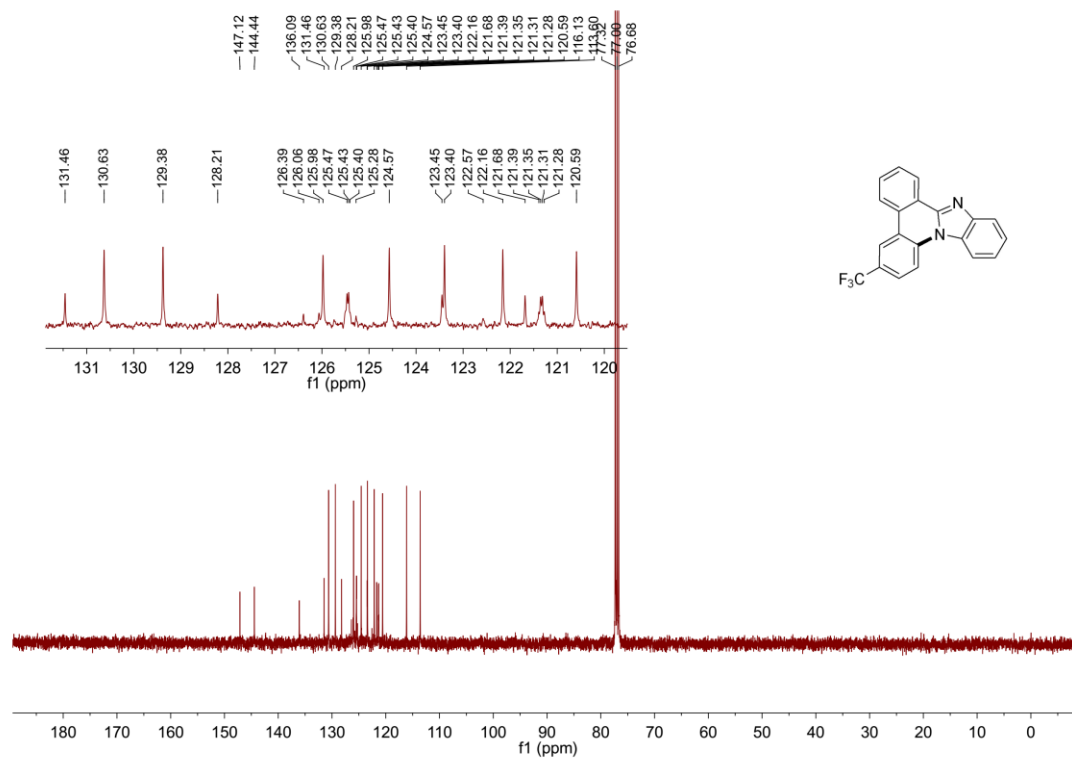

2aa <sup>1</sup>H NMR

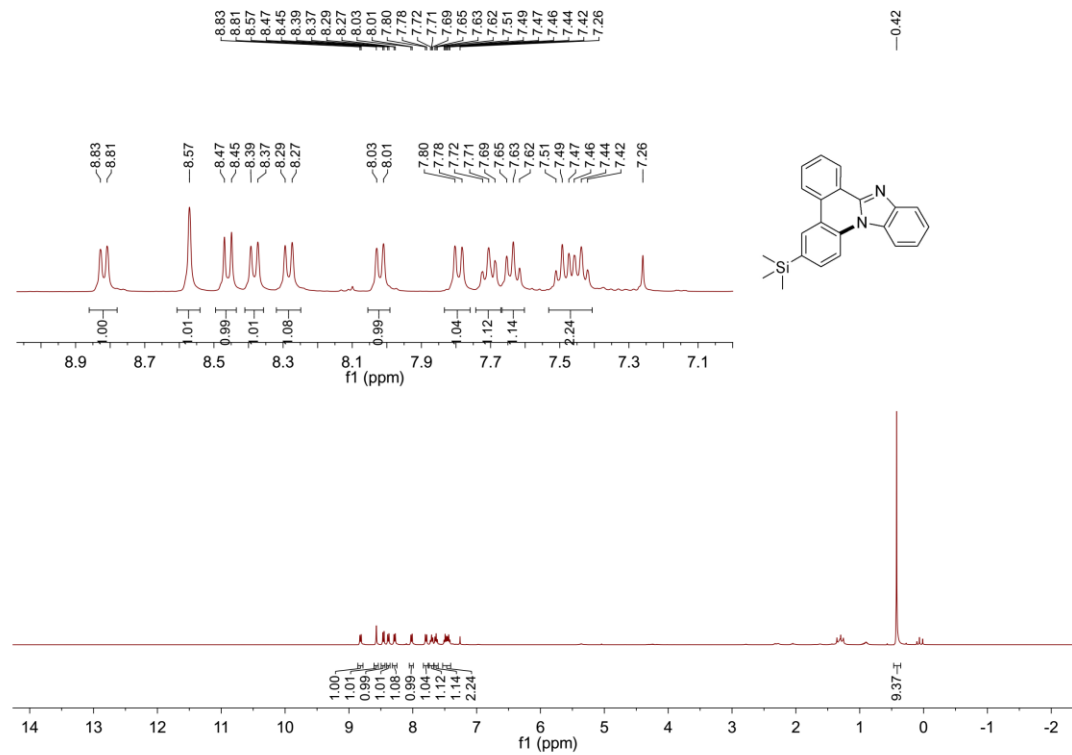

**2aa <sup>13</sup>C NMR**

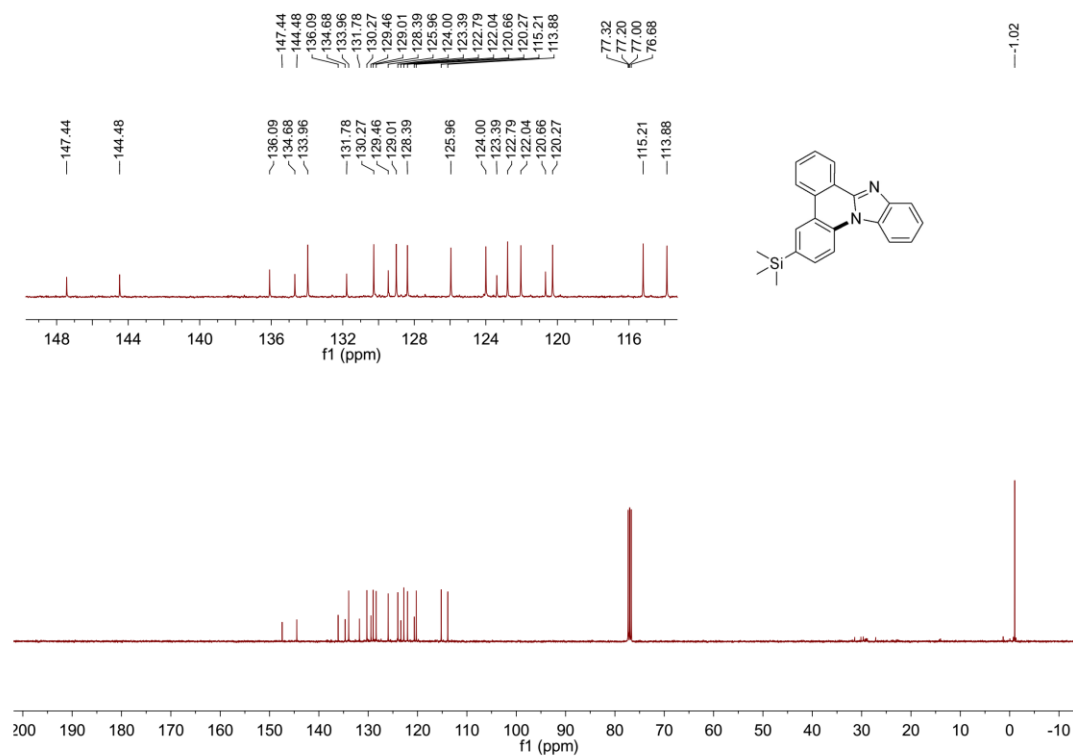

**2ab <sup>1</sup>H NMR**

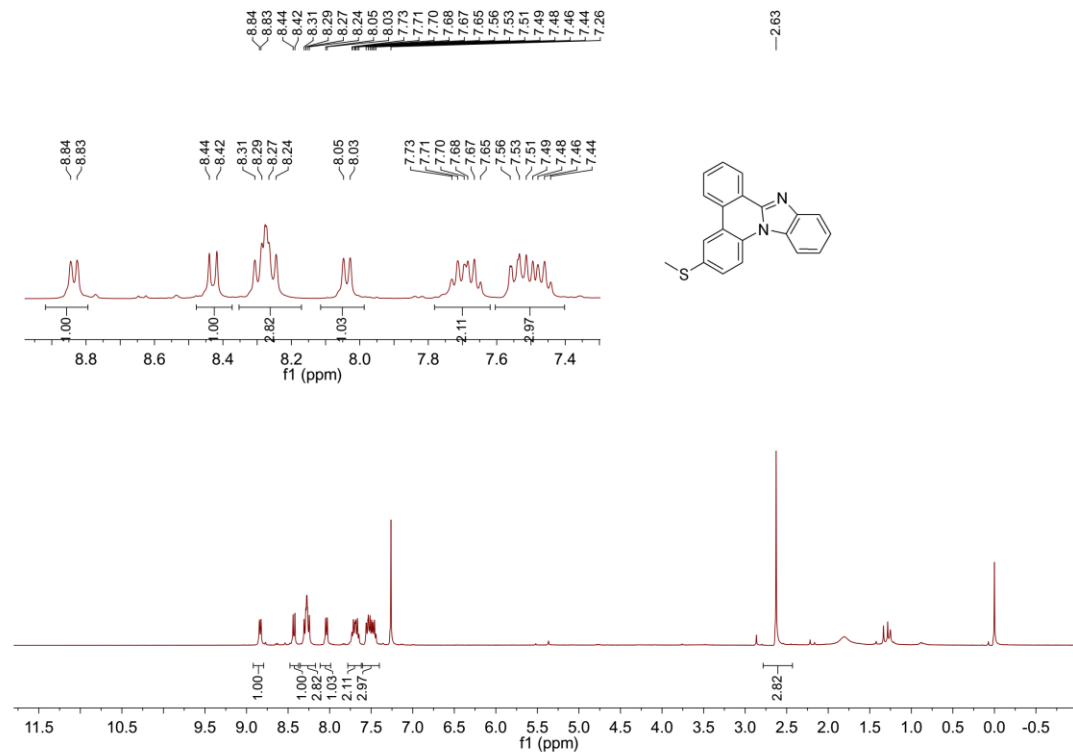

2ab <sup>13</sup>C NMR

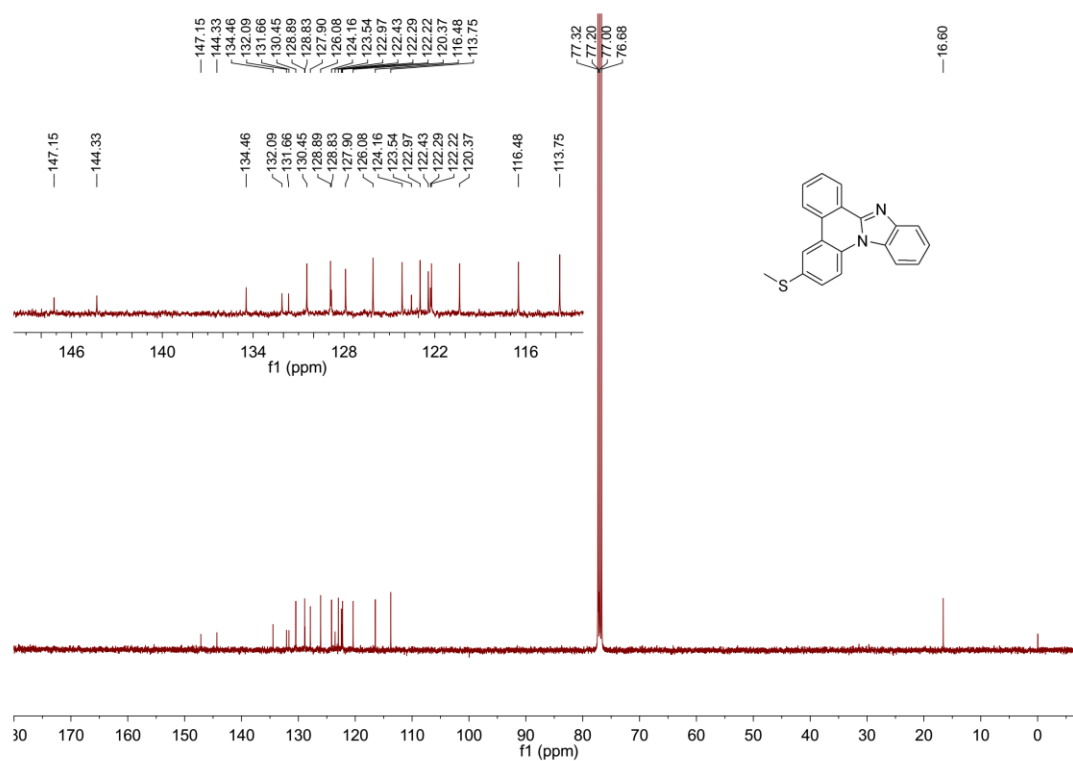

2ac <sup>1</sup>H NMR

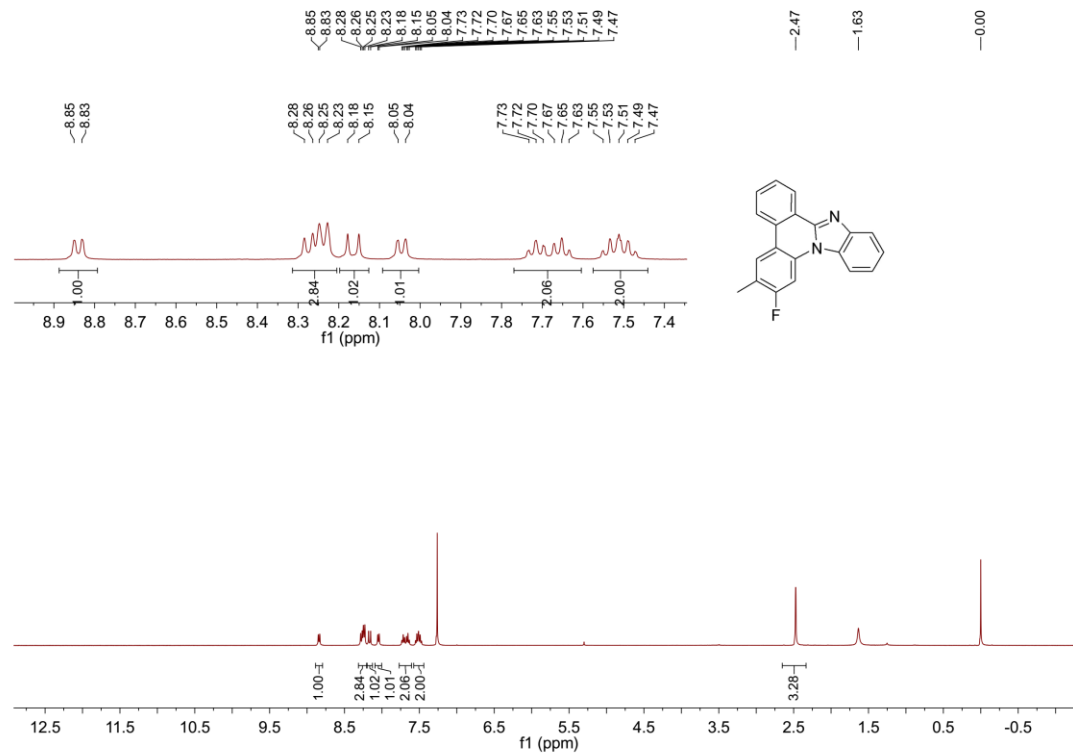

### 2ac <sup>13</sup>C NMR

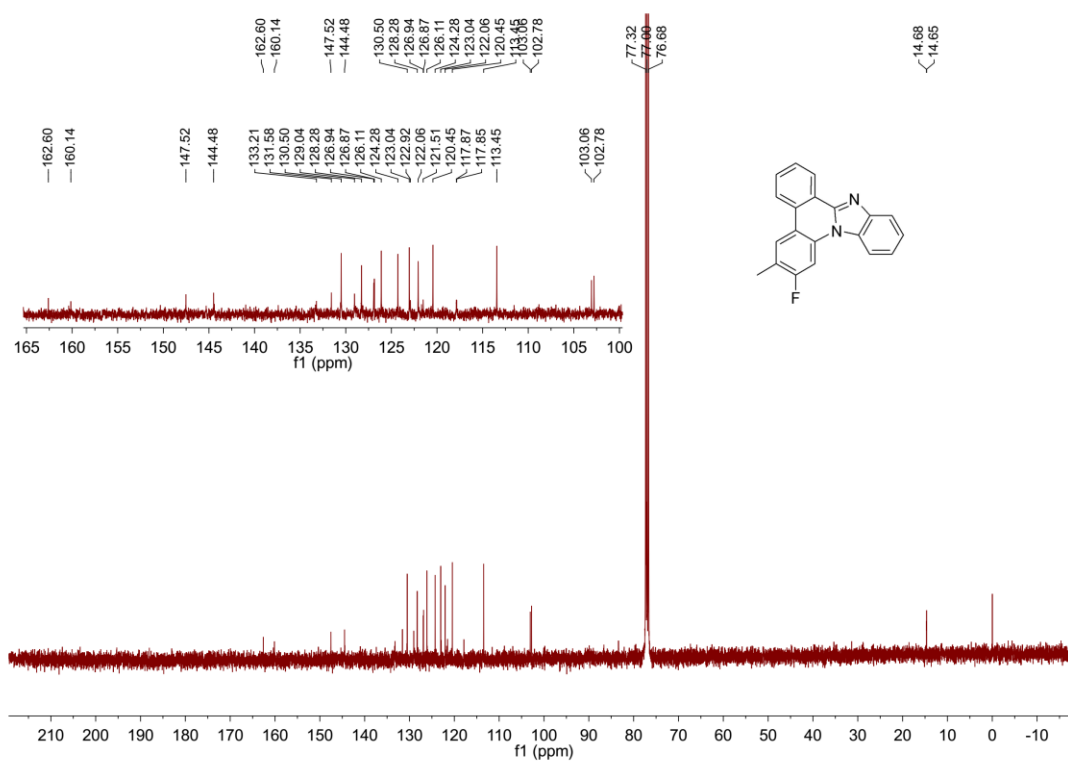

### 2ad <sup>1</sup>H NMR

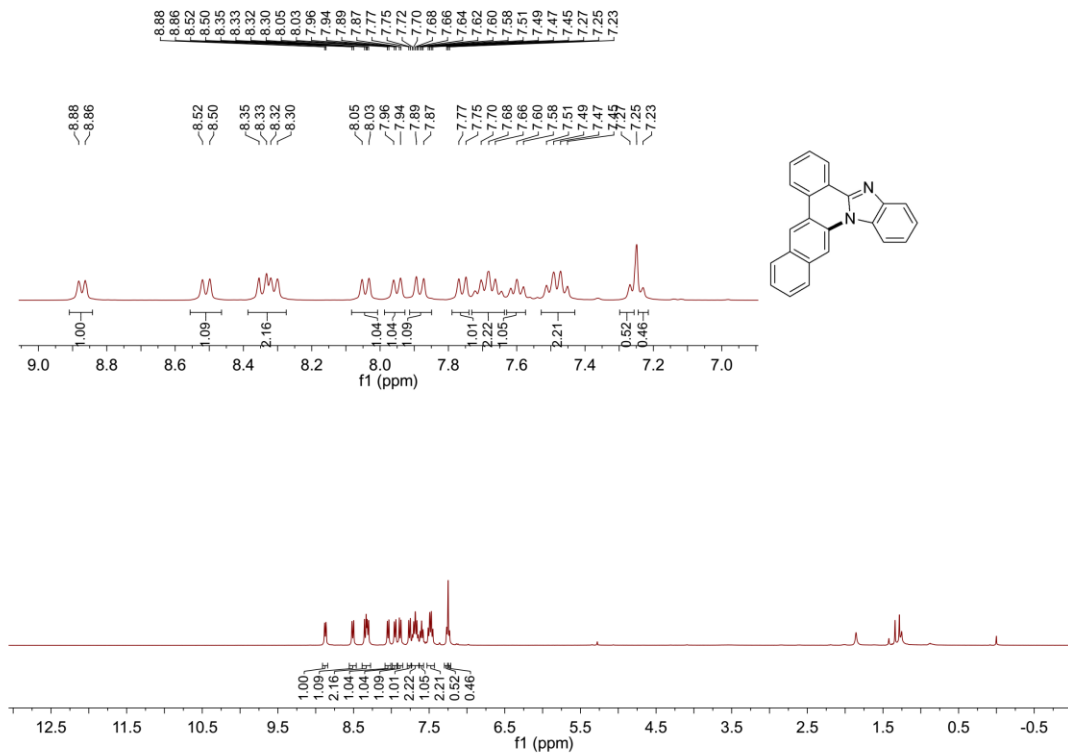



## 2ad <sup>13</sup>C NMR

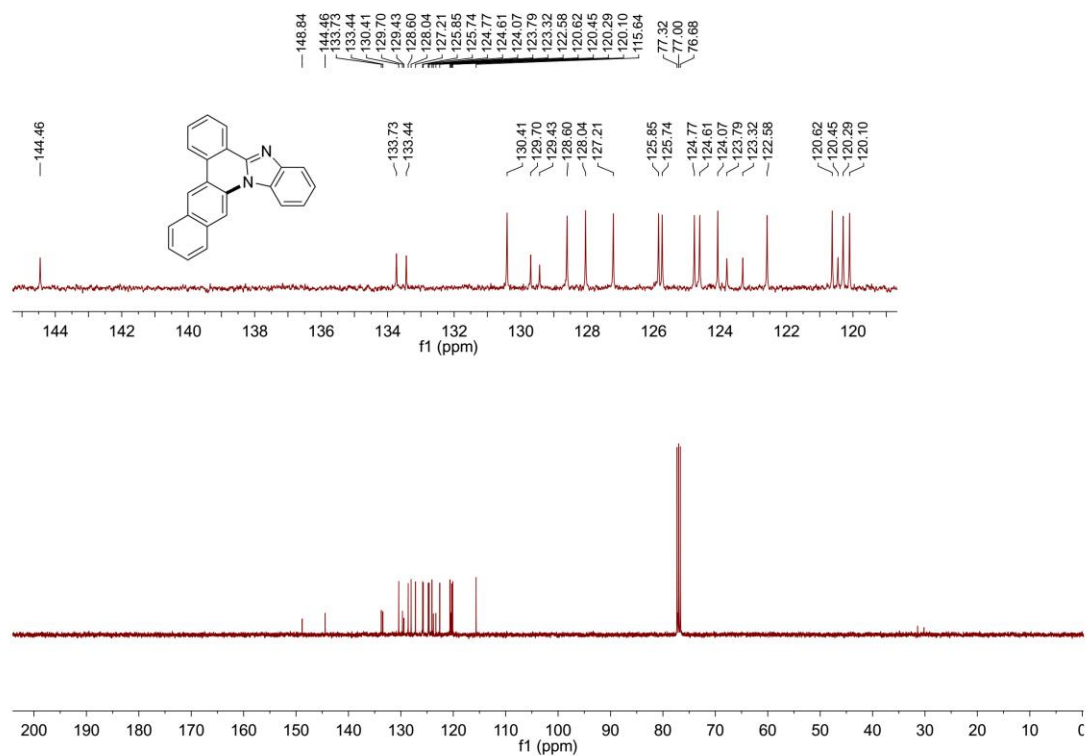

## 2ae <sup>1</sup>H NMR

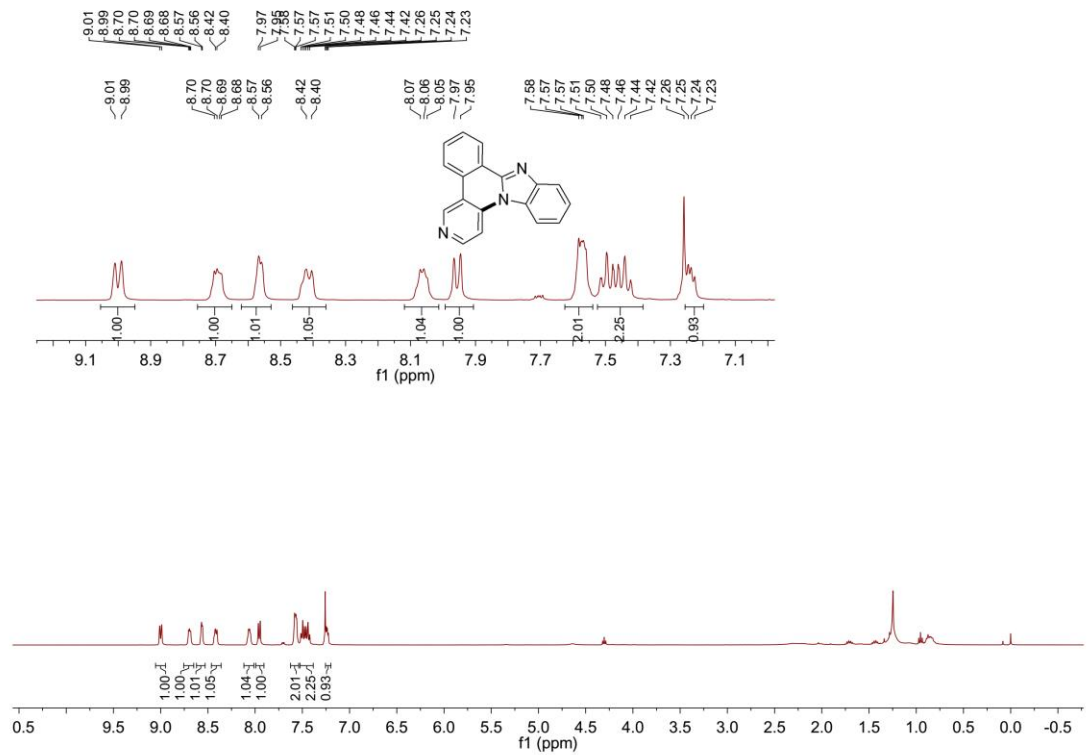

### 2ae <sup>13</sup>C NMR

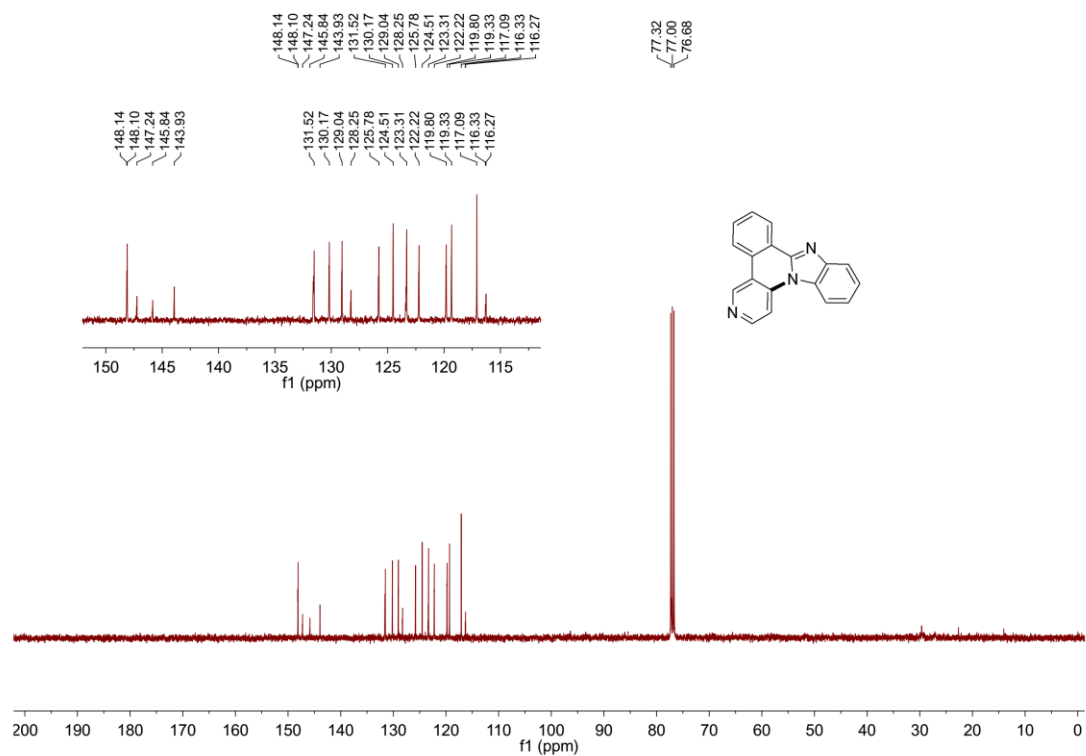

### 2af <sup>1</sup>H NMR

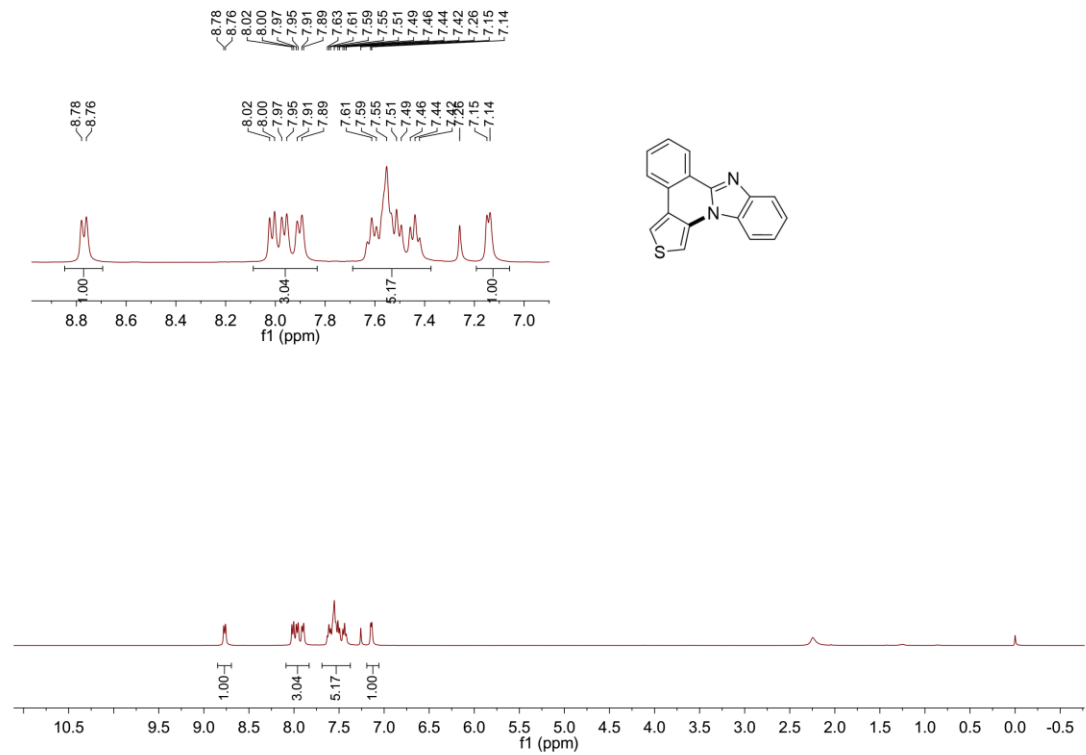

2af <sup>13</sup>C NMR

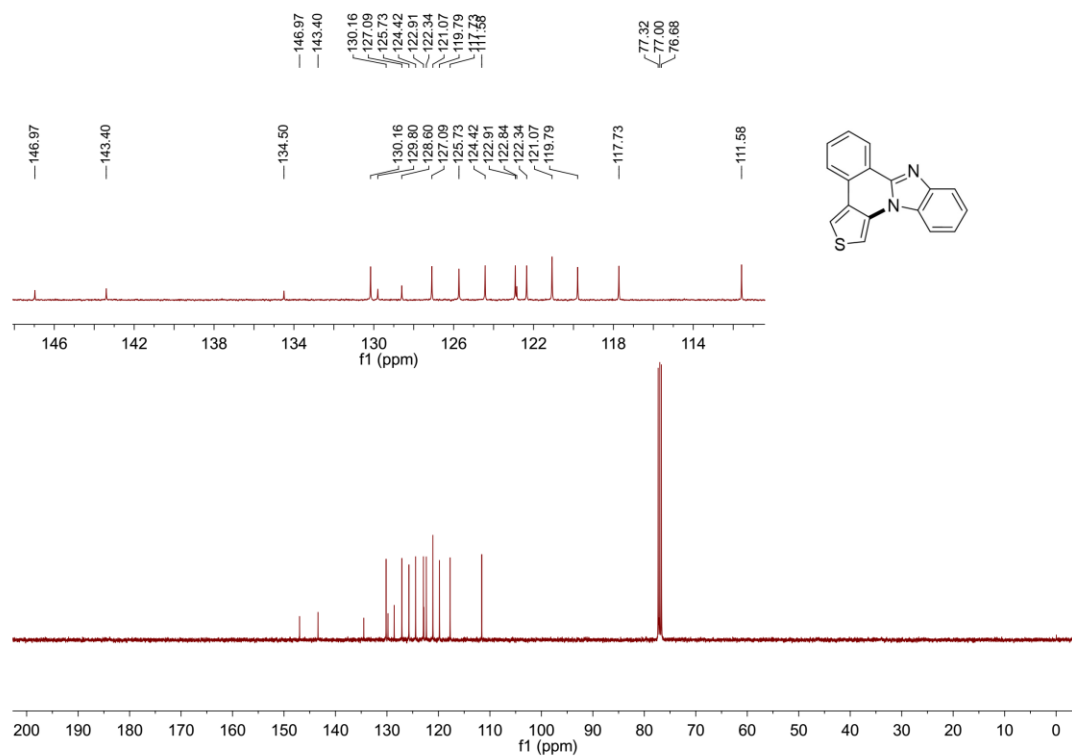

2ag <sup>1</sup>H NMR

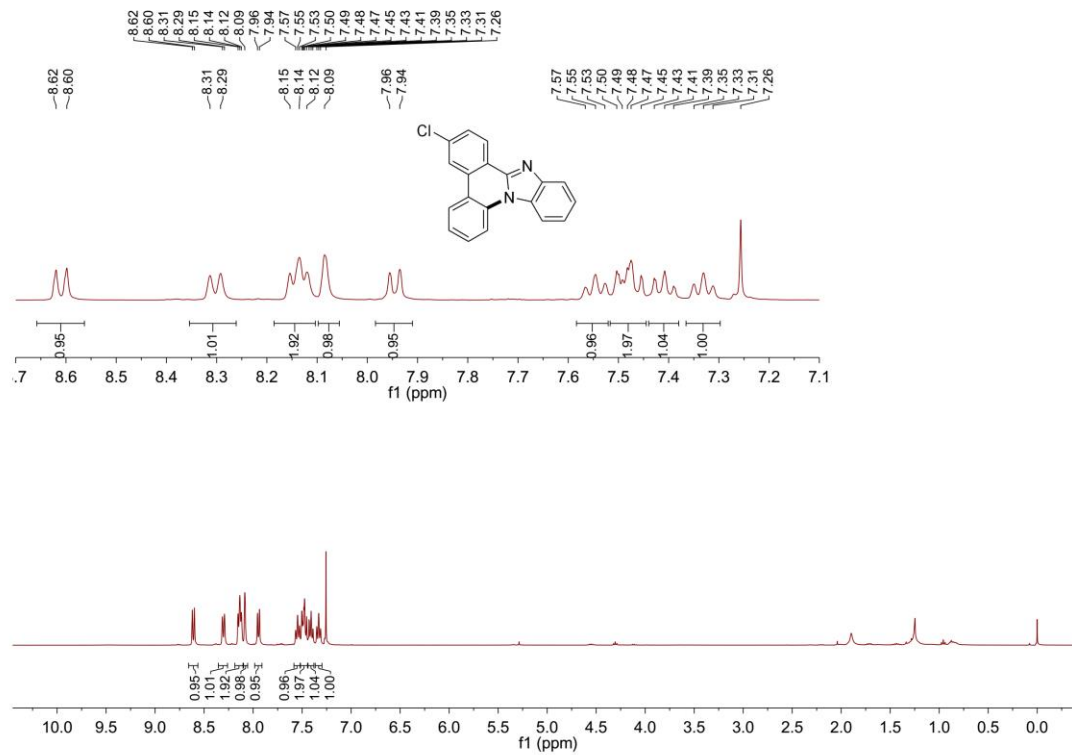

2ag <sup>13</sup>C NMR

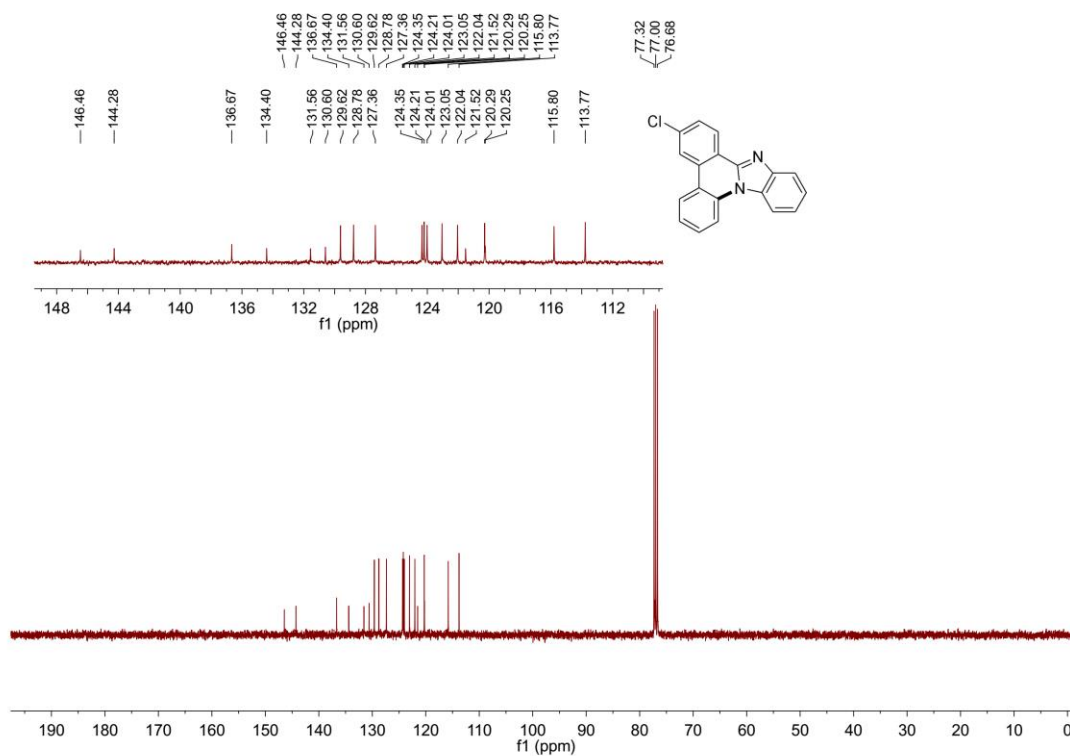

2ah <sup>1</sup>H NMR

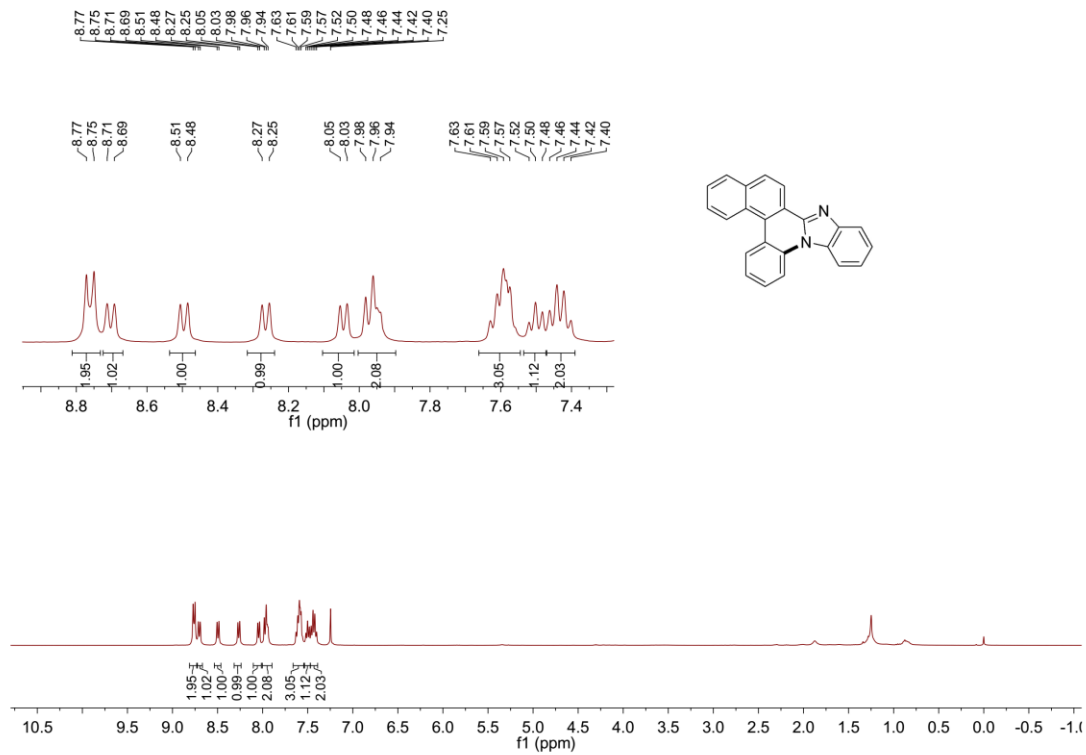

2ah <sup>13</sup>C NMR

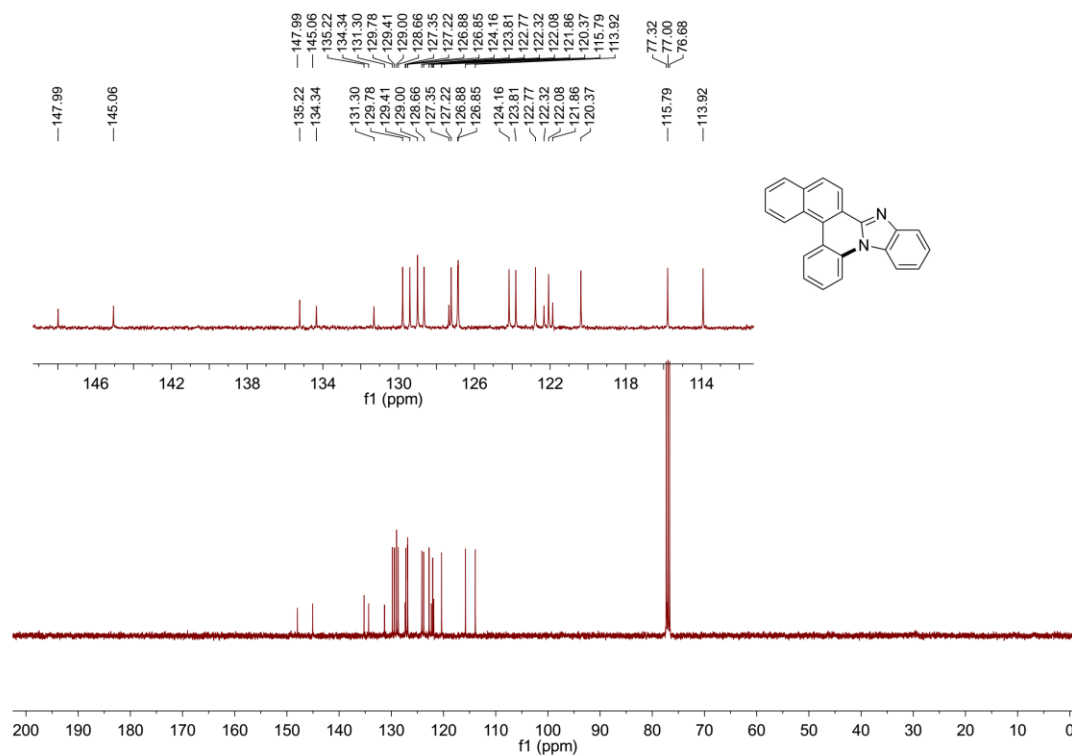

2ai <sup>1</sup>H NMR

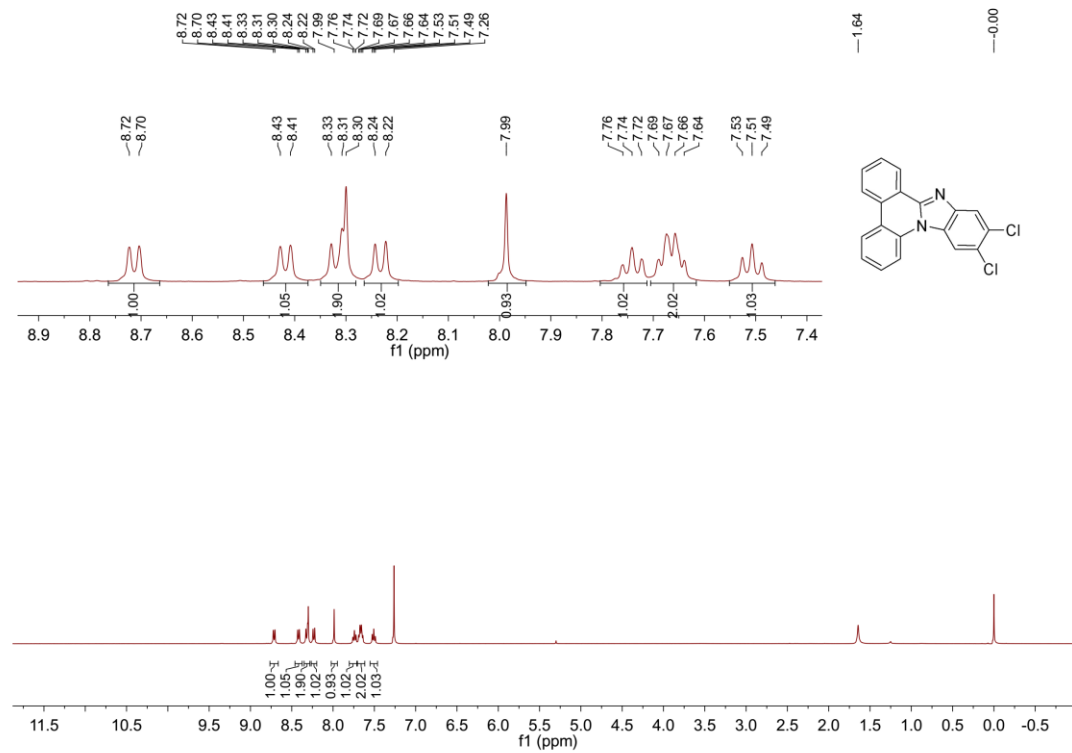

2ai <sup>13</sup>C NMR

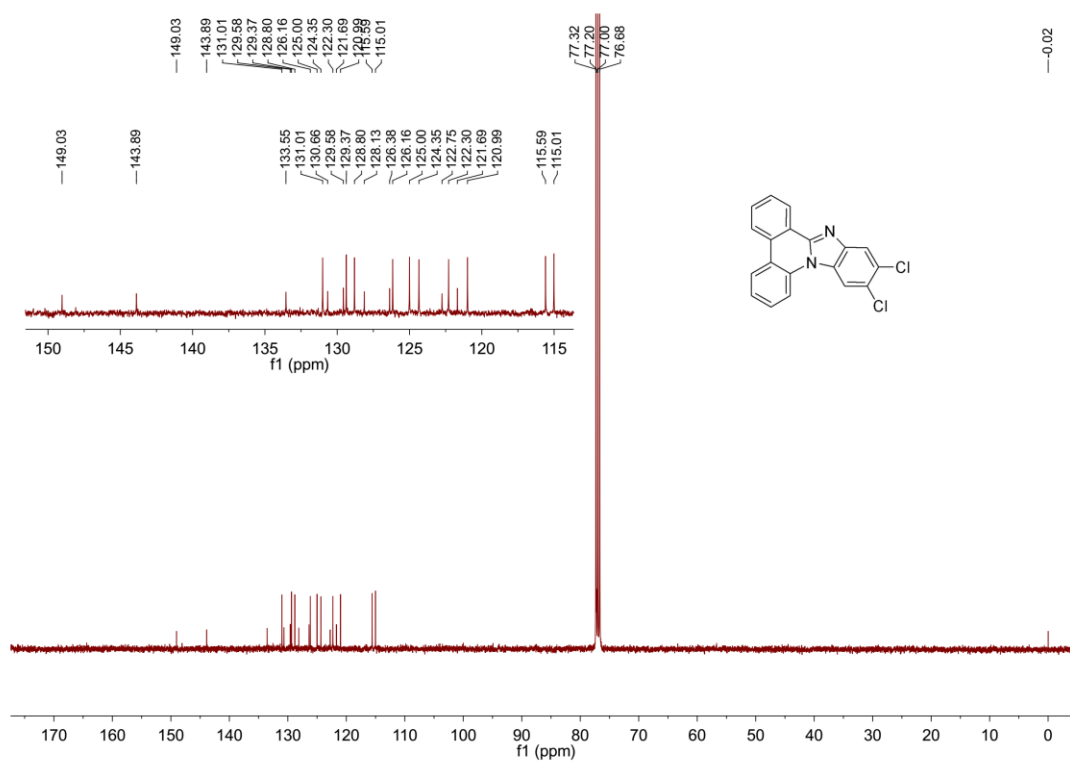

2aj <sup>1</sup>H NMR

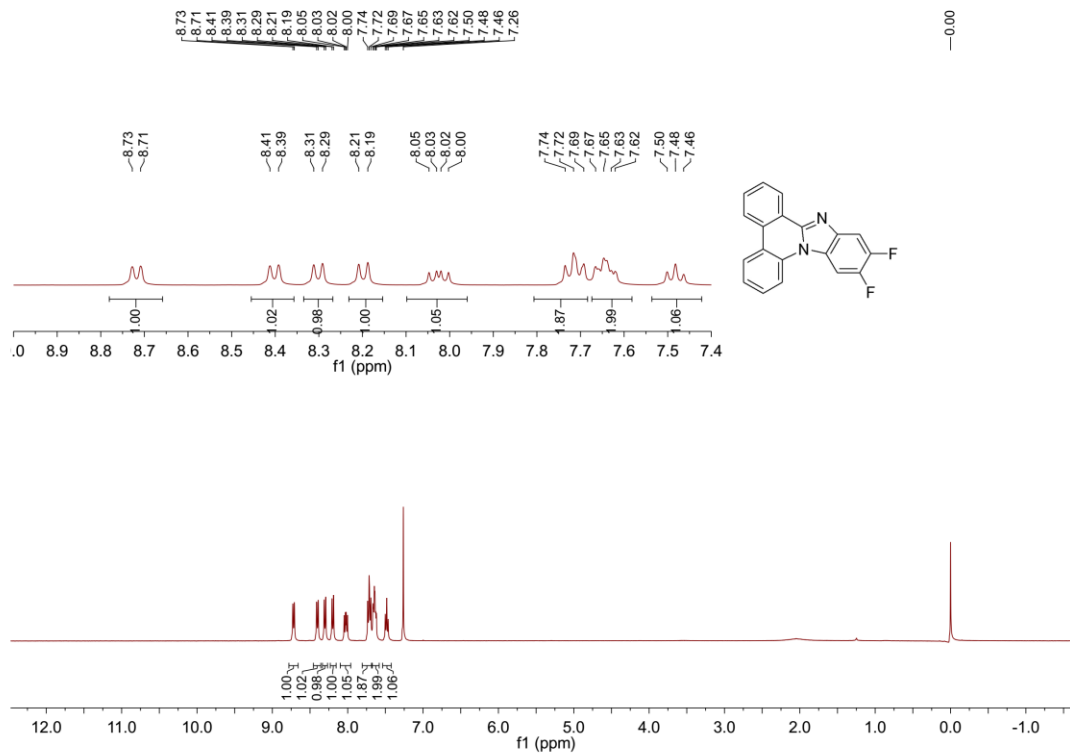

## 2aj <sup>19</sup>F NMR

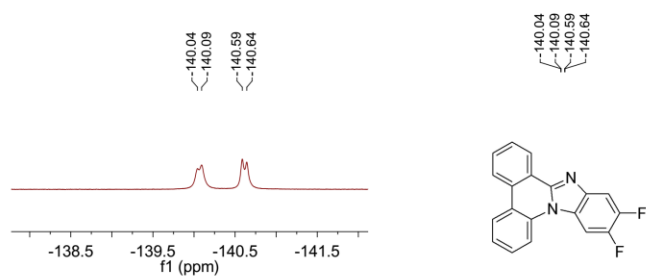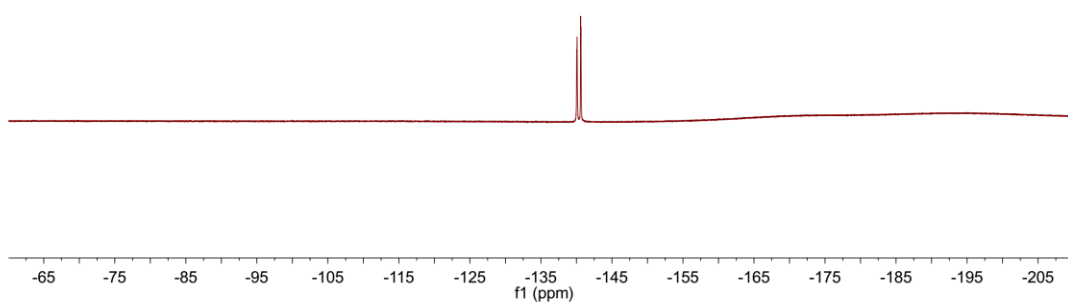

## 2aj <sup>13</sup>C NMR

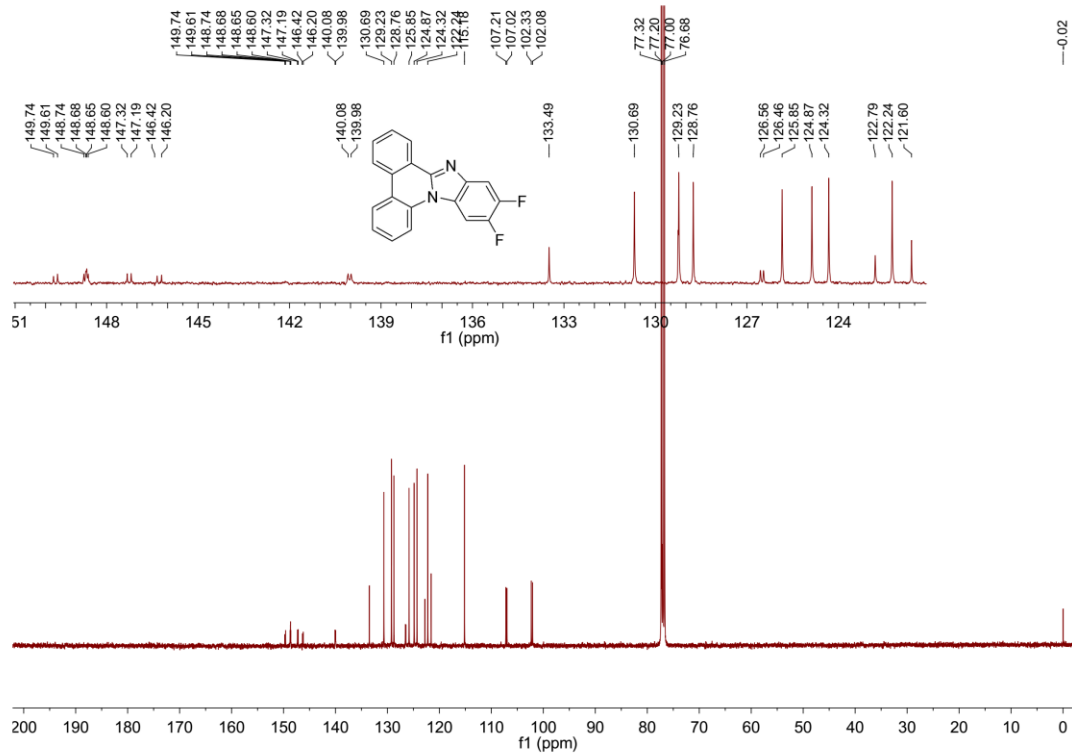

2ak <sup>1</sup>H NMR

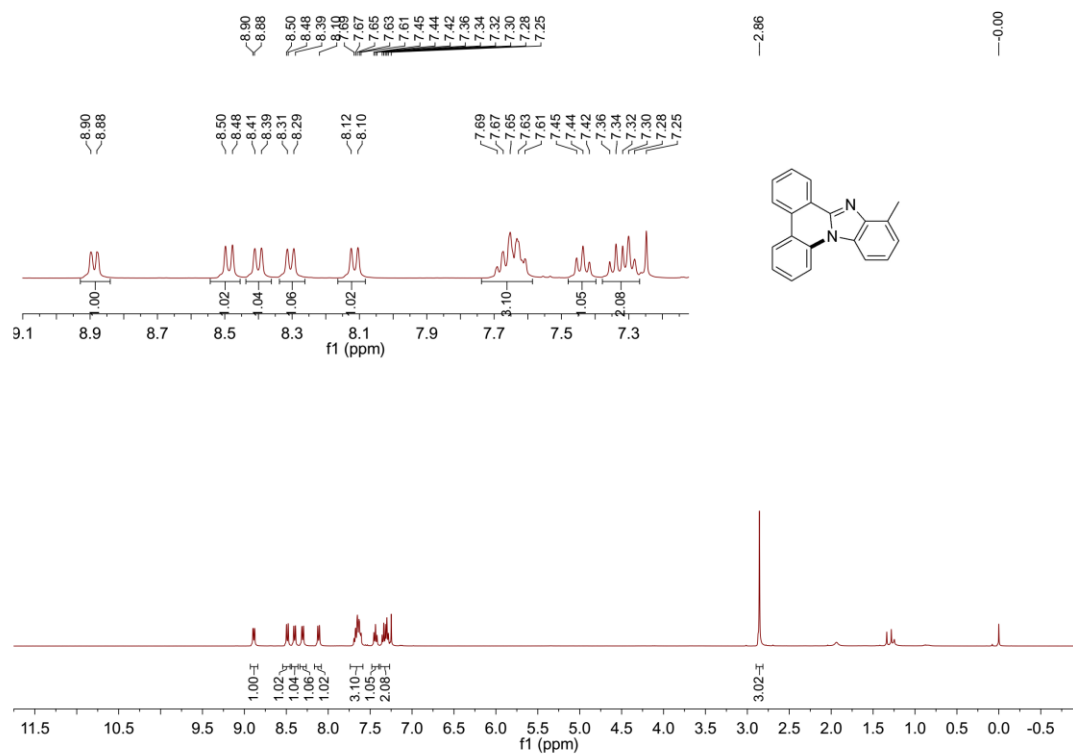

2ak <sup>13</sup>C NMR

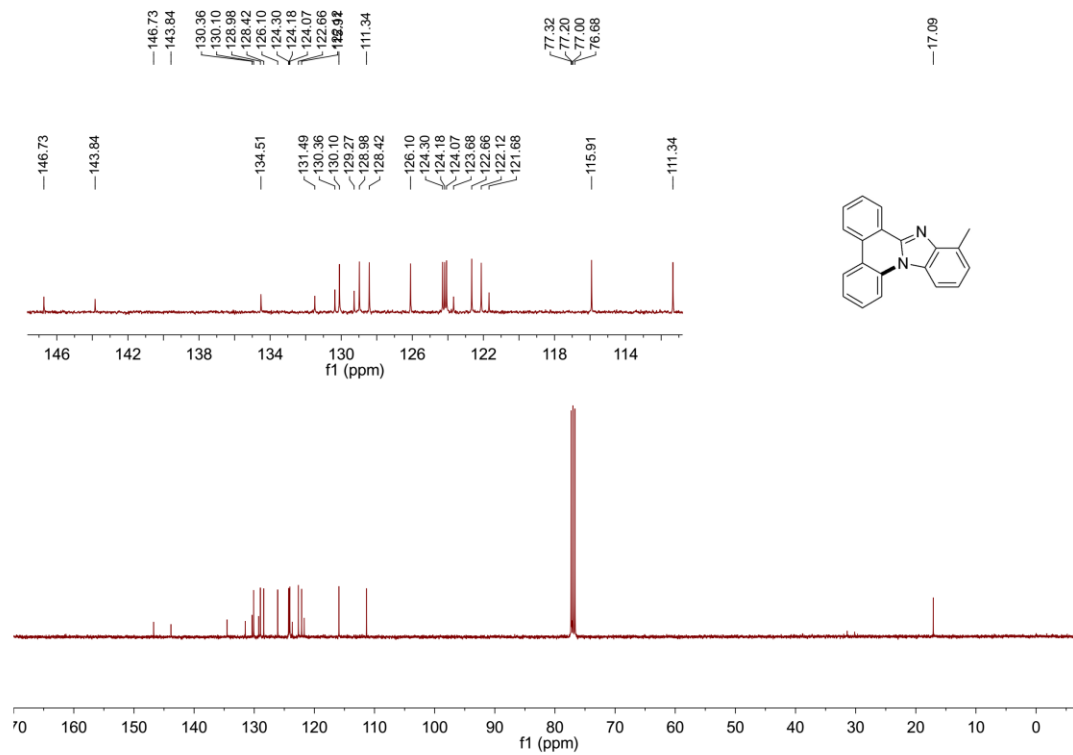



2a1 <sup>1</sup>H NMR

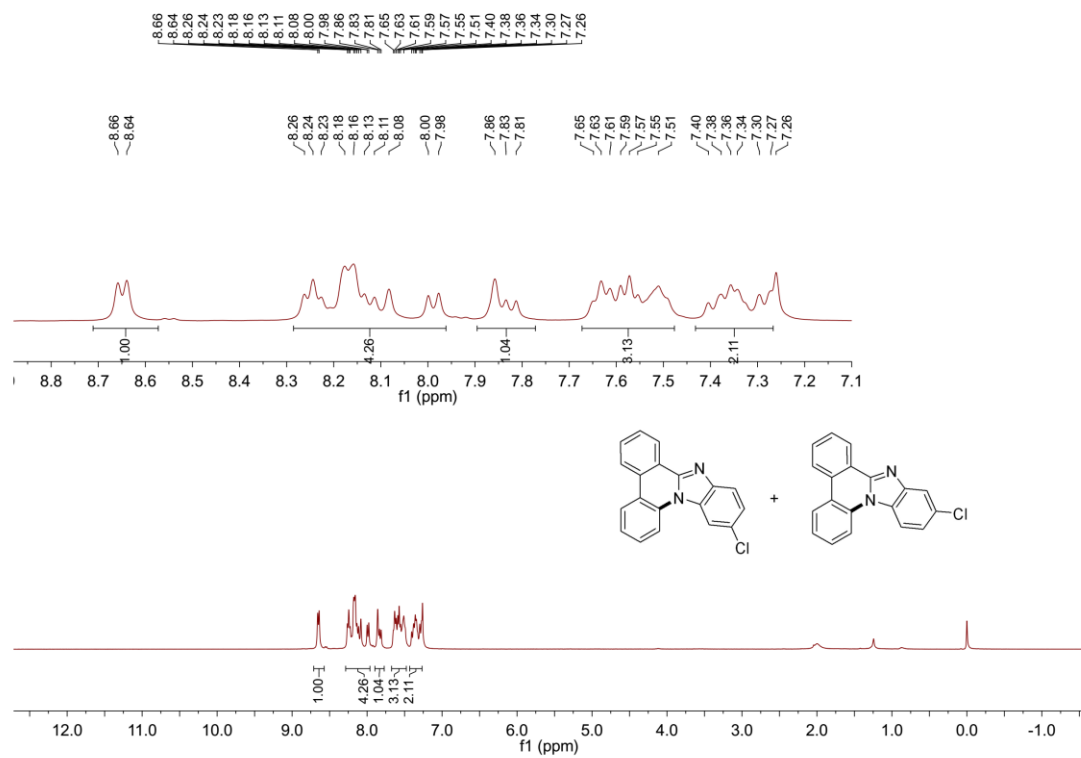

2a1 <sup>13</sup>C NMR

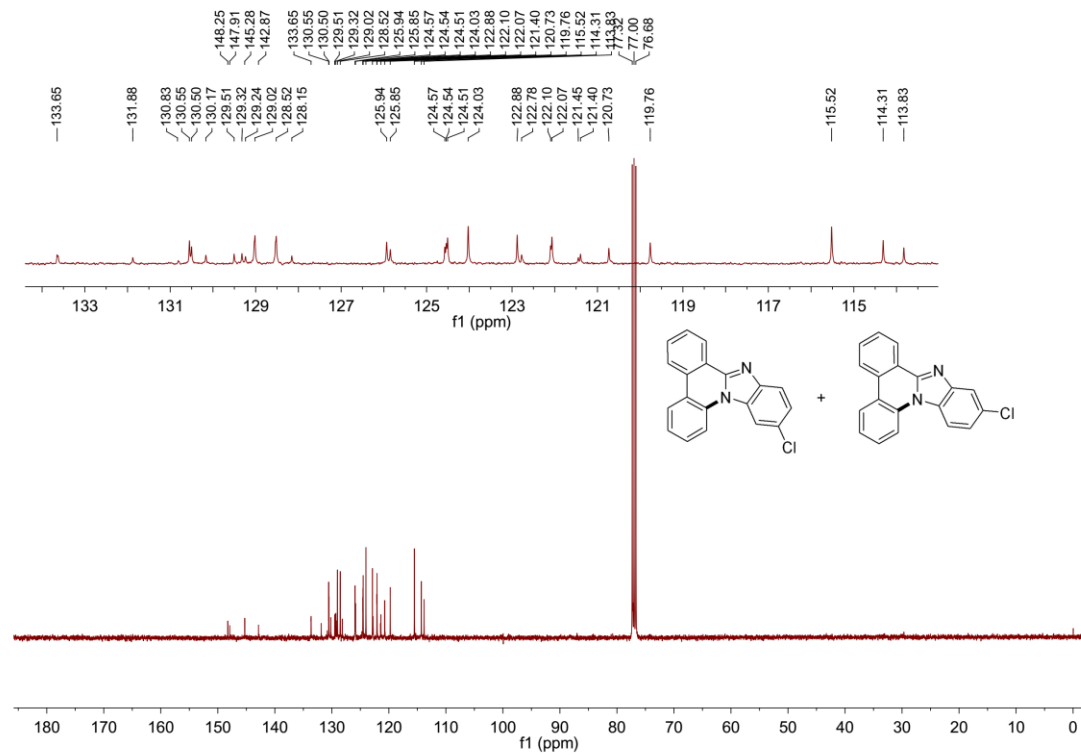

Supplement: d0qo01584a1.pdf [file d0qo01584a1.pdf]
